# Supplementary material for: Brain Gene Co-Expression Network Analysis Identifies 22q13 Region Genes Associated with Autism, Intellectual Disability, Seizures, Language Impairment, and Hypotonia
Source: MDPI journal article supplement (doi:10.3390/genes14111998), 2023-10-26
Supplement: s1 [file s1]

## Supporting Information

### Brain gene co-expression network analysis identifies 22q13 region genes associated with autism, intellectual disability, seizures, language impairment and hypotonia

Snehal Shah<sup>1,2</sup>, Sara M. Sarasua<sup>1,\*</sup>, Luigi Boccuto<sup>1</sup>, Brian C. Dean<sup>3</sup> and Liangjiang Wang<sup>2,4,\*</sup>

<sup>1</sup>Healthcare Genetics Program, School of Nursing, Clemson University, Clemson, SC 29634, USA

<sup>2</sup>Department of Genetics and Biochemistry, Clemson University, Clemson, SC 29634, USA

<sup>3</sup>School of Computing, Clemson University, Clemson, SC 29634, USA

<sup>4</sup>Center for Human Genetics, Clemson University, Greenwood, SC 29646, USA

\*Correspondence: liangjw@clemson.edu (LW); smsaras@clemson.edu (SMS)

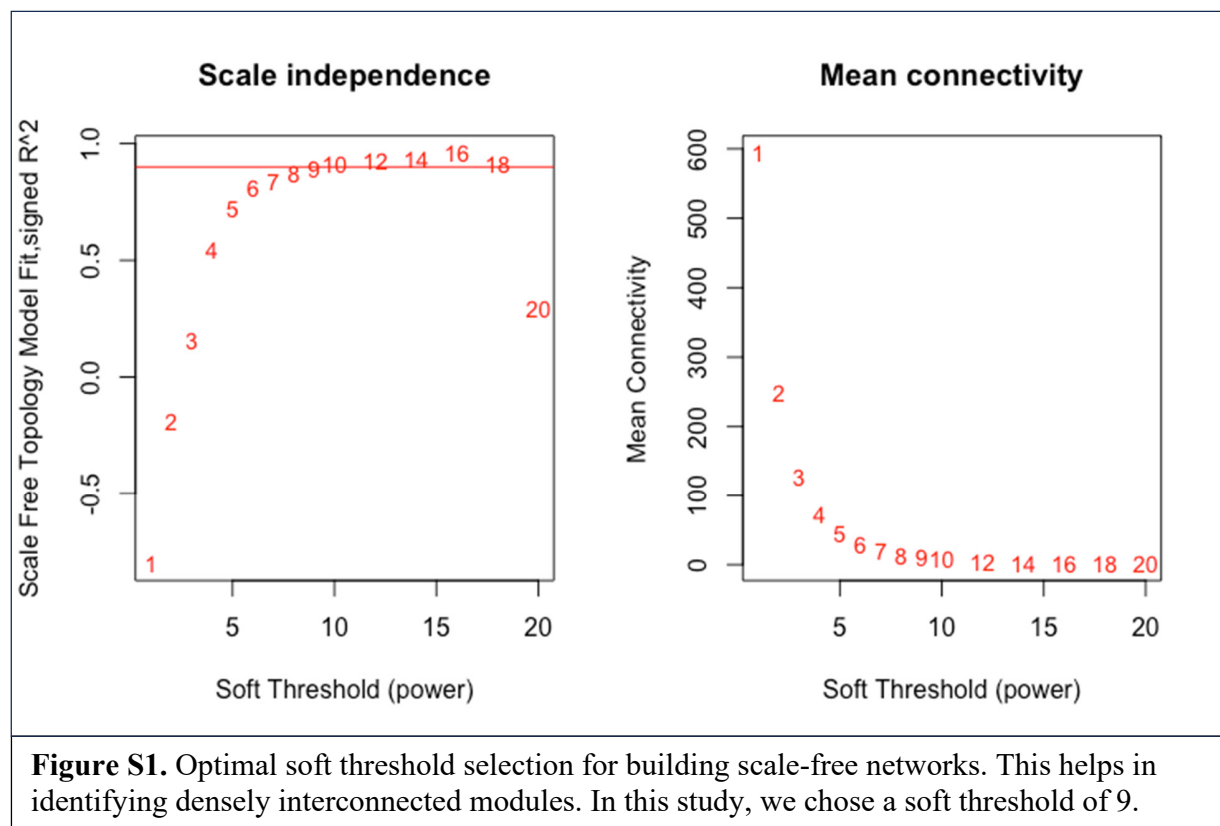



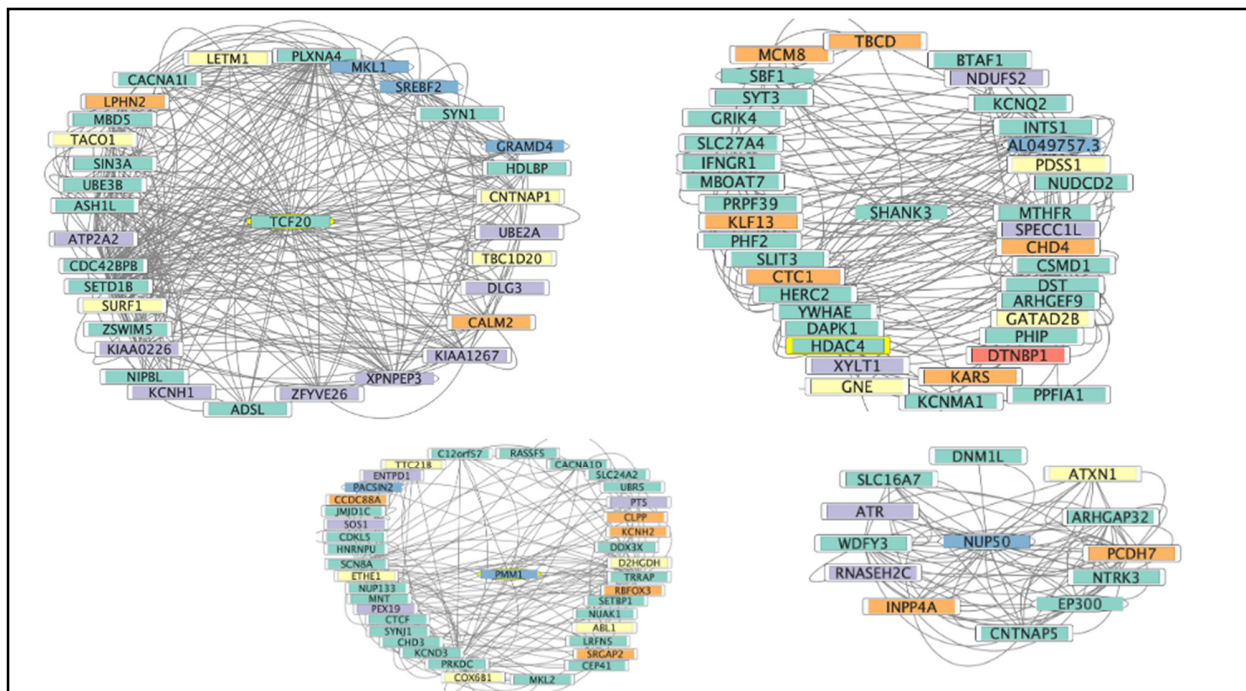

**Figure S3.** Network visualization to show the interactions of hub genes using Cytoscape. The figure illustrates the network topology for *TCF20*, *PMM1*, *SHANK3*, and *NUP50*, all of which are selected candidate genes on 22q13 for the phenotypes, including ASD, ID, seizures and language impairment. The genes are represented in the figure by different colors and shapes, reflecting the specific associated phenotypes: ASD – turquoise, ID – purple, hypotonia – yellow, language impairment – red, seizures – orange. PMS genes are shown in oval shape.
