# Supplementary material for: Brain Gene Co-Expression Network Analysis Identifies 22q13 Region Genes Associated with Autism, Intellectual Disability, Seizures, Language Impairment, and Hypotonia
Source: Genes (Basel). 2023 Oct 26;14(11):1998. doi: 10.3390/genes14111998 (PMC10671420; doi:10.3390/genes14111998)
Supplement: Supplementary file 1 [file genes-14-01998-s001.zip › Supplementary_Tables_S1_S2_S3_S4.xlsx]

## Sheet: Table S1
Table S1. List of candidate genes in the 22q13 region, prioritized based on degree of connectivity and module eigengenes. ME - Module Eigengenes; ASD - Autism Spectrum Disorder; ID - Intellectual Disability; Lang_imp - Language Impairment; _per - percentage.
Gene	Ensembl	MEs	co-expression	degree	ASD_num	ID_num	Seizure_num	Hypotonia_num	Lang_Imp_num	mlabel	mcolor	ASD_gene	ID_gene	Seizure_gene	Hypotonia_gene	Lang_Imp_gene	X22q13_gene	ASD_per	ID_per	Seizure_per	hypo_per	LI_per	pLI
EP300	ENSG00000100393	kMEblue, kMEmagenta, kMEturquoise	CHD8, EARS2, HDLBP, CHD5, IQSEC2, KDM5C, HERC2, KIF1A, UNC13A, PRRC2B, TRIO, MYH10, DAGLA, L3MBTL2, RANGAP1, ZC3H7B, BRD1, DNAJC5, GMEB2, CLCN6, SLC35A2, CD99L2, TSC2, SLC7A5, FBXO31, EIF3E, MED25, GPI, ATP1A3, OGDH, DNM1, ENG, RAI1, CNTNAP1, EFTUD2, AMBRA1, CHD4, ATN1, CCNG1, CRBN, DLGAP3, ARID1A, SLC12A5, PNPLA6, GLO1, MBOAT7, PRR12, AHDC1, APBA2, SMARCA4, KDM4B, TICAM1, TUBGCP6, LRRC4, NDUFA5,…	973	461	348	395	0	26	1	blue,magenta	1	1	0	0	0	1	48.9904	45.5497	49.4368	0	37.6812	1
TCF20	ENSG00000100207	kMEblue, kMEturquoise	RBX1, EP300, CHD8, EARS2, HDLBP, CHD5, IQSEC2, KDM5C, HERC2, KIF1A, UNC13A, PRRC2B, TRIO, MYH10, DAGLA, PPP6R2, SBF1, CACNA1I, L3MBTL2, RANGAP1, ZC3H7B, BRD1, DNAJC5, CHRNA4, GMEB2, CLCN6, SLC35A2, CD99L2, TSC2, SLC7A5, FBXO31, EIF3E, MED25, GPI, ATP1A3, OGDH, DNM1, ENG, RAI1, CNTNAP1, EFTUD2, AMBRA1, CHD4, ATN1, CCNG1, CRBN, DLGAP3, ARID1A, GRN, SLC12A5, PNPLA6, GLO1, MBOAT7, PRR12, AHDC1, APBA2…	945	456	346	384	0	25	1	blue	1	0	0	0	0	1	48.4591	45.288	48.0601	0	36.2319	1
BRD1	ENSG00000100425	kMEmagenta, kMEturquoise	CHD8, EARS2, HDLBP, CHD5, IQSEC2, KDM5C, HERC2, KIF1A, UNC13A, PRRC2B, TRIO, MYH10, DAGLA, DNAJC5, GMEB2, CLCN6, SLC35A2, CD99L2, TSC2, SLC7A5, FBXO31, EIF3E, MED25, ATP1A3, OGDH, DNM1, ENG, RAI1, CNTNAP1, EFTUD2, AMBRA1, CHD4, ATN1, CCNG1, CRBN, DLGAP3, ARID1A, SLC12A5, PNPLA6, GLO1, MBOAT7, PRR12, AHDC1, APBA2, SMARCA4, KDM4B, TICAM1, TUBGCP6, LRRC4, NDUFA5, INO80, DPP6, ACTN4, ZC3H4, DNMT1, PL…	614	298	216	255	0	16	1	magenta	0	0	0	0	0	1	31.6684	28.2723	31.9149	0	23.1884	1
SBF1	ENSG00000100241	kMEgreenyellow, kMEpurple, kMEturquoise	RBX1, EP300, CHD8, EARS2, HDLBP, CHD5, IQSEC2, KDM5C, HERC2, KIF1A, UNC13A, PRRC2B, TRIO, MYH10, DAGLA, LMF2, TTLL12, CACNA1I, L3MBTL2, RANGAP1, ZC3H7B, BRD1, TELO2, DNAJC5, CHRNA4, GMEB2, CLCN6, SLC35A2, CD99L2, PORCN, TSC2, SLC7A5, FBXO31, BCKDK, EIF3E, MED25, GPI, ATP1A3, OGDH, TAF6, DNM1, ENG, RAI1, CNTNAP1, EFTUD2, AMBRA1, CHD4, ATN1, CCNG1, CRBN, MOGS, AMPD2, DLGAP3, ARID1A, CTSD, GRN, SLC1…	483	210	162	204	0	12	1	greenyellow, purple	1	0	0	0	0	1	22.3167	21.2042	25.5319	0	17.3913	1
GRAMD4	ENSG00000075240	kMEpurple, kMEturquoise	SRCAP, KIF3C, HUWE1, TCF20, RBX1, EP300, CHD8, HDLBP, CHD5, IQSEC2, KDM5C, HERC2, KIF1A, UNC13A, PRRC2B, TRIO, MYH10, DAGLA, CSNK1E, PLXNA4, RP4-796I17.5, JRK, SHANK3, PTPN23, UBE2A, CIC, DLGAP4, CACNA2D2, CAD, CNOT3, SYN1, GNA11, SLC9A1, ABL1, STX1B, CELSR3, SPECC1L, DEPDC5, PPP6R2, SBF1, CACNA1I, RANGAP1, ZC3H7B, BRD1, TELO2, DNAJC5, CHRNA4, GMEB2, CLCN6, TSC2, SLC7A5, FBXO31, EIF3E, MED25, ATP…	368	185	115	158	0	13	1	turquoise	0	0	0	0	0	1	19.6599	15.0524	19.7747	0	18.8406	1
SHANK3	ENSG00000251322	kMEgreenyellow, kMEred	SRCAP, KIF3C, HUWE1, TCF20, RBX1, EP300, CHD8, HDLBP, CHD5, IQSEC2, KDM5C, HERC2, KIF1A, UNC13A, PRRC2B, TRIO, MYH10, DAGLA, PTPN23, UBE2A, CIC, DLGAP4, PLOD1, CACNA2D2, CAD, PIGQ, ALG6, CNOT3, SYN1, GNA11, SLC9A1, ABL1, STX1B, CELSR3, SPECC1L, DEPDC5, PPP6R2, SBF1, LMF2, TTLL12, CACNA1I, L3MBTL2, RANGAP1, ZC3H7B, BRD1, TELO2, DNAJC5, CHRNA4, GMEB2, CLCN6, CD99L2, PORCN, TSC2, SLC7A5, FBXO31, EIF…	342	162	110	143	0	9	1	turquoise	1	1	1	1	0	1	17.2157	14.3979	17.8974	0	13.0435	1
MAPK8IP2	ENSG00000008735	kMEgreenyellow	IQSEC2, KDM5C, KIF1A, DAGLA, CACNA1I, RANGAP1, TELO2, DNAJC5, CHRNA4, GMEB2, CD99L2, TSC2, SLC7A5, FBXO31, MED25, ATP1A3, OGDH, TAF6, RAI1, AMBRA1, ATN1, AMPD2, DLGAP3, CTSD, GRN, PNPLA6, MBOAT7, PRR12, AHDC1, APBA2, SMARCA4, KDM4B, TICAM1, UBA1, DHX30, RTN4R, AGAP2, PIK3R2, GRIK5, NRXN2, ARHGAP33, SLC4A3, TRAF7, EEF1A2, CORO1A, ERCC2, PPP2R1A, DVL1, STK11, PEX16, MAP2K2, KLF16, DLG4, TUBB4A, PEP…	165	76	51	69	0	3	11	greenyellow	1	0	0	0	0	1	8.07651	6.67539	8.63579	0	4.34783	1
CELSR1	ENSG00000075275	kMEpurple, kMEyellow	TRIO, DLGAP4, CHRNA4, AMBRA1, KDM4B, EPHB2, AGAP2, DGKD, CD59, FGD1, GRIN2D, PIK3R2, GRIK5, NRXN2, ARHGAP33, KIF21B, KCNJ5, HIVEP3, MYO16, COL4A2, DCX, IGF1, DPYSL3, NID1, PCDHA13, PCDHAC1, PCDHA11, PCDHA10, PCDHA12, PCDHA3, PCDHA6, HIVEP2, TECTA, MARK1, PCDHAC2, GNPTAB, LRRC7, MYCN, APC, THBS1, CENPE, ST8SIA2, XPR1, FLG, EPHA5, KIAA2022, SDK1, NLGN4X, CASK, SLC16A2, LAMC3, QDPR, PHF21B, SETBP1, …	83	58	22	32	0	3	4	yellow	0	0	0	0	0	1	6.16366	2.87958	4.00501	0	4.34783	1
PLXNB2	ENSG00000196576	kMEmagenta, kMEred, kMEturquoise	SLC6A17, HTT, SPTAN1, CLASP1, CDC42BPB, MTOR, RUSC2, L1CAM, SREBF2, SRCAP, HUWE1, TCF20, RBX1, EP300, CHD8, HDLBP, CHD5, IQSEC2, KDM5C, HERC2, KIF1A, UNC13A, PRRC2B, TRIO, MYH10, DAGLA, MKL1, SDHA, DYNC1H1, ADARB1, ATAD3A, SZT2, QRICH1, NOTCH3, SDHD, DNAJC19, NUP62, GRAMD4, CSNK1E, PLXNA4, RP4-796I17.5, JRK, SHANK3, PTPN23, UBE2A, CIC, PLOD1, CACNA2D2, CAD, PIGQ, CNOT3, GNA11, SLC9A1, ABL1, STX1B…	414	188	143	170	0	12	1	turquoise	0	0	1	0	0	1	19.9787	18.7173	21.2766	0	17.3913	0.99
PIM3	ENSG00000198355	kMEgreenyellow	RUSC2, L1CAM, SREBF2, SRCAP, CHD5, IQSEC2, KDM5C, KIF1A, DAGLA, NOTCH3, KCNQ2, FAM116B, SYT3, NUP62, CSNK1E, XX-C283C717.1, SHANK3, PTPN23, CIC, DLGAP4, PIGQ, CNOT3, SYN1, GNA11, PPP6R2, SBF1, TTLL12, CACNA1I, RANGAP1, TELO2, DNAJC5, CHRNA4, GMEB2, CD99L2, TSC2, SLC7A5, FBXO31, MED25, ATP1A3, OGDH, TAF6, ENG, RAI1, AMBRA1, ATN1, DLGAP3, CTSD, GRN, PNPLA6, MBOAT7, PRR12, AHDC1, APBA2, SMARCA4, KDM…	155	72	49	64	0	4	11	greenyellow	0	0	0	0	0	1	7.65143	6.41361	8.01001	0	5.7971	0.98
SCUBE1	ENSG00000159307	kMEpurple	AP3D1, GRIN1, MAPT, RUSC2, L1CAM, ATP13A2, DVL3, SLC45A1, NCKAP5L, FASN, NLGN2, SEZ6L2, PACS1, PHRF1, LMNB2, CACNA1G, SLC25A22, BRF1, MKL1, SYNGAP1, ATAD3A, SYT3, GRAMD4, CSNK1E, CIC, DLGAP4, PPP6R2, CACNA1I, TELO2, CHRNA4, SLC7A5, AMBRA1, PRR12, KDM4B, EPHB2, AGAP2, CELSR1, LRP5, SLC29A4, DCHS1, CHD3, PER1, SLC35C1, COL4A1, TUBB3, C1orf70, WDR62, DGKD, CD59, GNAO1, MCOLN1, ABCD1, FGD1, GRIN2D, P…	76	41	21	30	0	1	10	purple	0	0	0	0	0	1	4.35707	2.74869	3.75469	0	1.44928	0.96
RBX1	ENSG00000100387	kMEblue, kMEmagenta, kMEturquoise	EP300, CHD8, EARS2, HDLBP, CHD5, IQSEC2, KDM5C, HERC2, KIF1A, UNC13A, PRRC2B, TRIO, MYH10, DAGLA, L3MBTL2, RANGAP1, ZC3H7B, BRD1, DNAJC5, GMEB2, CLCN6, SLC35A2, CD99L2, TSC2, SLC7A5, FBXO31, EIF3E, MED25, GPI, ATP1A3, OGDH, DNM1, ENG, RAI1, CNTNAP1, EFTUD2, AMBRA1, CHD4, ATN1, CCNG1, CRBN, DLGAP3, ARID1A, SLC12A5, PNPLA6, GLO1, MBOAT7, PRR12, AHDC1, APBA2, SMARCA4, KDM4B, TICAM1, TUBGCP6, LRRC4, …	889	425	326	360	0	22	1	blue,magenta	0	0	0	0	0	1	45.1647	42.6702	45.0563	0	31.8841	0.95
PHF5A	ENSG00000100410	kMEblue, kMEturquoise	CHD8, EARS2, HDLBP, CHD5, IQSEC2, KDM5C, HERC2, KIF1A, UNC13A, PRRC2B, TRIO, MYH10, DAGLA, BRD1, DNAJC5, GMEB2, CLCN6, CD99L2, TSC2, SLC7A5, FBXO31, EIF3E, ATP1A3, OGDH, DNM1, RAI1, CNTNAP1, EFTUD2, AMBRA1, CHD4, ATN1, CCNG1, CRBN, ARID1A, SLC12A5, GLO1, MBOAT7, PRR12, AHDC1, APBA2, SMARCA4, KDM4B, LRRC4, NDUFA5, INO80, DPP6, ACTN4, ZC3H4, DNMT1, PLXNA3, UBA1, KCNC3, EPHB2, RNASEH2B, STXBP1, HIVE…	790	395	286	314	0	21	1	blue	0	0	0	0	0	1	41.9766	37.4346	39.2991	0	30.4348	0.87
ST13	ENSG00000100380	kMEmagenta, kMEred	RBX1, EP300, CHD5, IQSEC2, KDM5C, HERC2, KIF1A, UNC13A, PRRC2B, MYH10, DAGLA, RANGAP1, TSC2, EIF3E, MED25, DNM1, RAI1, CNTNAP1, CCNG1, CRBN, MOGS, AMPD2, PNPLA6, GLO1, MBOAT7, AHDC1, APBA2, SMARCA4, TUBGCP6, LRRC4, NDUFA5, INO80, ACTN4, DNMT1, PLXNA3, UBA1, CC2D1A, DHX30, EPHB2, B4GALNT1, RNASEH2B, STXBP1, POMT2, TAF1C, CD276, RAB2A, AKT2, TMEM106B, KCNT1, SHOC2, CEP164, PDHX, PPP2CA, SPAST, PTBP…	275	122	107	113	0	10	6	red	0	0	0	0	0	1	12.9649	14.0052	14.1427	0	14.4928	0.66
NUP50	ENSG00000093000	kMEblue, kMEpink	TCF20, RBX1, EP300, CHD8, EARS2, CHD5, KDM5C, HERC2, UNC13A, PRRC2B, TRIO, MYH10, SPECC1L, DEPDC5, CLCN6, RAI1, CHD4, ARID1A, SLC12A5, LRRC4, INO80, DPP6, ZC3H4, DNMT1, STXBP1, CHKB, MIB1, KATNAL1, NBN, MED13, PRKAR1A, COL4A3BP, PDE4D, CPEB4, CAMSAP2, PIK3CA, CUL3, RLIM, CHL1, SYNCRIP, NAA10, SPTLC2, PQBP1, GCK, PRUNE2, NDUFS8, C12orf57, NDUFS7, KPTN, CLPP, ITPA, SCO2, EIF3G, THOC6, TYMP, SATB2, …	714	369	267	282	0	27	2	blue, pink	0	0	0	0	0	1	39.2136	34.9476	35.2941	0	39.1304	0.28
SREBF2	ENSG00000198911	kMEmagenta, kMEred, kMEturquoise	SRCAP, KIF3C, HUWE1, TCF20, RBX1, EP300, CHD8, EARS2, HDLBP, CHD5, IQSEC2, KDM5C, HERC2, KIF1A, UNC13A, PRRC2B, TRIO, MYH10, DAGLA, NOS1AP, SDHD, KCNQ2, FAM116B, DNAJC19, SYT3, NUP62, GRAMD4, CSNK1E, PLXNA4, RP4-796I17.5, XX-C283C717.1, JRK, RAD21L1, SHANK3, PTPN23, UBE2A, CIC, DLGAP4, PLOD1, CACNA2D2, CAD, PIGQ, ALG6, CNOT3, SYN1, GNA11, SLC9A1, AARS, ABL1, STX1B, CELSR3, SPECC1L, TOP3B, DEPDC5,…	664	303	228	268	0	15	1	magenta, red	0	0	0	0	0	1	32.1998	29.8429	33.5419	0	21.7391	0.21
ACO2	ENSG00000100412	kMEgreenyellow	TELO2, TSC2, MED25, GPI, TAF6, ATN1, MOGS, CTSD, GRN, PNPLA6, TICAM1, DHX30, TRAF7, NPRL3, EEF1A2, ERCC2, DVL1, NDUFS7, STK11, PEX16, MAP2K2, PEPD, GIPC1, POLR3H, B4GALT7, NR1H2, KATNB1, ARHGDIA, AKT1, PEX14, PPP1R3F, DGKZ, B3GAT3, TAOK2, KCNH2, SLC38A10, PEX10, ATP13A2, CTBP1, NACC1, SLC45A1, IGSF8, INTS1, APBB1, ROGDI, SLC27A4, NDUFV1, FASN, GAA, PC, SEZ6L2, KLC2, SLC25A22, GRINA, PUF60, RBM10,…	83	23	33	32	0	2	11	greenyellow	0	1	1	0	0	1	2.44421	4.31937	4.00501	0	2.89855	0.21
C22orf32	ENSG00000183172	kMEblue, kMEturquoise	MAPT, SRGAP3, XPNPEP3, SLC6A17, HTT, SPTAN1, CLASP1, CDC42BPB, MTOR, RUSC2, L1CAM, SREBF2, SRCAP, KIF3C, HUWE1, TCF20, RBX1, EP300, CHD8, EARS2, HDLBP, CHD5, IQSEC2, KDM5C, HERC2, KIF1A, UNC13A, PRRC2B, TRIO, MYH10, DAGLA, BCOR, EP400, RP5-821D11.7, SLIT3, MED12, PRPF39, TRRAP, MKL1, C14orf21, DYNC1H1, SYNGAP1, ADARB1, QRICH1, NOTCH3, NOS1AP, SDHD, KCNQ2, DNAJC19, NUP62, GRAMD4, PLXNA4, RP4-796I1…	813	410	300	322	0	25	2	blue	0	0	0	0	0	1	43.5707	39.267	40.3004	0	36.2319	0.18
PPP6R2	ENSG00000100239	kMEgreenyellow, kMEred, kMEturquoise	RBX1, EP300, CHD8, EARS2, HDLBP, CHD5, IQSEC2, KDM5C, HERC2, KIF1A, UNC13A, PRRC2B, TRIO, MYH10, DAGLA, SBF1, LMF2, TTLL12, CACNA1I, L3MBTL2, RANGAP1, ZC3H7B, BRD1, TELO2, DNAJC5, CHRNA4, GMEB2, CLCN6, SLC35A2, CD99L2, PORCN, TSC2, SLC7A5, FBXO31, BCKDK, EIF3E, MED25, GPI, ATP1A3, OGDH, TAF6, DNM1, ENG, RAI1, CNTNAP1, EFTUD2, AMBRA1, CHD4, ATN1, CCNG1, CRBN, MOGS, AMPD2, DLGAP3, ARID1A, CTSD, GRN…	569	248	195	236	0	15	1	greenyellow,red	0	0	0	0	0	1	26.3549	25.5236	29.5369	0	21.7391	0.16
RANGAP1	ENSG00000100401	kMEmagenta, kMEturquoise	CHD8, EARS2, HDLBP, CHD5, IQSEC2, KDM5C, HERC2, KIF1A, UNC13A, PRRC2B, TRIO, MYH10, DAGLA, ZC3H7B, BRD1, TELO2, DNAJC5, CHRNA4, GMEB2, CLCN6, SLC35A2, CD99L2, PORCN, TSC2, SLC7A5, FBXO31, BCKDK, EIF3E, MED25, GPI, ATP1A3, OGDH, TAF6, DNM1, ENG, RAI1, CNTNAP1, EFTUD2, AMBRA1, CHD4, ATN1, CCNG1, CRBN, MOGS, AMPD2, DLGAP3, ARID1A, CTSD, GRN, SLC12A5, PNPLA6, GLO1, MBOAT7, PRR12, AHDC1, APBA2, SMARCA…	619	274	212	250	0	15	1	magenta	0	0	1	0	0	1	29.118	27.7487	31.2891	0	21.7391	0.03
PPARA	ENSG00000186951	kMEgreen	ARHGEF10, PPFIA1, SLC2A10, GPR56, SLC1A3, FAT1, MLC1, ZNF423, GLI3, KANK1, SASH1, ATP1A2, PARD3B, ARHGAP31, FGFRL1, CGNL1, PLCD1, WNT7B, MAOA, RYR1, GM2A, GLI2, ELOVL2, SMOC1, NOTCH2NL, GPC4, OPHN1, PAX6, BCKDHB, HADHA, PHGDH, CECR2, PRODH, AASS, HFE, LAMA1, TBL1X, MID1, CHRDL1, ABHD5, SALL1, EYA1, CD38, SLC1A2, KAT2B, DOCK7, PPP1R3C, GPSM2, CXCR4, SARDH, BAZ2B, MOCS1, BBS2, MASP1, SGCE, MCCC2, A…	119	50	50	45	0	8	5	green	0	0	0	0	0	1	5.3135	6.5445	5.63204	0	11.5942	0.03
LDOC1L	ENSG00000188636	kMEblue, kMEturquoise	SRGAP3, XPNPEP3, SLC6A17, HTT, SPTAN1, CLASP1, CDC42BPB, MTOR, RUSC2, L1CAM, SREBF2, SRCAP, KIF3C, HUWE1, TCF20, RBX1, EP300, CHD8, EARS2, HDLBP, CHD5, IQSEC2, KDM5C, HERC2, KIF1A, UNC13A, PRRC2B, TRIO, MYH10, DAGLA, TRRAP, MKL1, C14orf21, DYNC1H1, SYNGAP1, ADARB1, QRICH1, NOTCH3, NOS1AP, SDHD, KCNQ2, DNAJC19, SYT3, NUP62, GRAMD4, CSNK1E, PLXNA4, RP4-796I17.5, JRK, RAD21L1, PTPN23, UBE2A, CIC, DL…	597	325	194	246	0	17	1	blue	0	0	0	0	0	1	34.5377	25.3927	30.7885	0	24.6377	0.02
TRABD	ENSG00000170638	kMEbrown, kMEcyan, kMEred	TSNARE1, GAA, GMPPB, MTHFR, D2HGDH, PLXNB2, SZT2, CAD, PIGQ, TOP3B, PPP6R2, LMF2, MOGS, GLO1, TUBGCP6, PLXNA3, CC2D1A, ABCC8, PPM1D, HDAC3, PTEN, SERHL, NEGR1, PIGG, BBS1, CADM2, WDR73, PUS1, TBL1XR1, EXOC5, PACS2, BBS10, BBS12, SGSH, TSEN54, CACNB4, RRP7B, MAPK11, ACADVL, MAPK12, C15orf62, RP3-402G11.5, TRIM33, ZNF517, OPA1, COL11A2, CPT1B, CYP2D7P1, RNPS1, TSN, NRAS, LAT, LTB4R, GALT, RP4-669P1…	199	76	70	72	0	7	6	red	0	0	0	0	0	1	8.07651	9.1623	9.01126	0	10.1449	0.02
POLR3H	ENSG00000100413	kMEpink	NPRL3, MED13, COL4A3BP, PIK3CA, PQBP1, DVL1, NDUFS8, C12orf57, NDUFS7, NCAPH2, STK11, KPTN, PEX16, CLPP, MAP2K2, SCO2, EIF3G, THOC6, PMM1, DMXL2, LIN7B, SLC25A39, ETHE1, RAD50, BIRC6, ASH1L, AKT3, RAB3GAP2, GIPC1, USP9X, MPDU1, GAMT, NDUFA2, VPS13B, SCN2A, EMD, NAGLU, B4GALT7, PNKP, NR1H2, NR1D1, KRR1, YTHDC2, HECW2, KATNB1, PEX14, LYST, ANK2, NHP2, NDUFB11, DGKZ, B3GAT3, ANK3, SACS, RANBP2, PHF6…	116	44	59	47	0	2	8	pink	0	0	0	0	0	1	4.67588	7.72251	5.88235	0	2.89855	0.01
PPPDE2	ENSG00000100418	kMEcyan	MIB1, TAZ, KATNAL1, TAF1C, PIGL, MED13, PRKAR1A, AGPS, PDE4D, CPEB4, CAMSAP2, ABCD4, STRADA, MRI1, RLIM, KRAS, NAA10, NPRL2, MMACHC, PPOX, XPR1, AMT, KIAA2022, PGAP2, MMAA, GUCY1A2, CACNA2D1, KIF5A, GNAQ, WDR26, TTC8, SPRED1, COQ4, ACSL4, NLGN1, STAT2, TRABD, PTEN, SERHL, BBS1, WDR73, EXOC5, TSEN54, RRP7B, PBX1, ACADVL, TRIM33, OPA1, CPT1B, NRAS, LAT, TREX1, GALT, CTA-217C2.1, CHKB-CPT1B, HMBS, R…	66	21	29	26	0	2	14	cyan	0	0	0	0	0	1	2.23167	3.79581	3.25407	0	2.89855	0.01
XPNPEP3	ENSG00000196236	kMEblue, kMEturquoise	SLC6A17, HTT, SPTAN1, CLASP1, CDC42BPB, MTOR, RUSC2, L1CAM, SREBF2, SRCAP, KIF3C, HUWE1, TCF20, RBX1, EP300, CHD8, EARS2, HDLBP, CHD5, IQSEC2, KDM5C, HERC2, KIF1A, UNC13A, PRRC2B, TRIO, MYH10, DAGLA, TRRAP, PLXNB2, MKL1, C14orf21, SDHA, DYNC1H1, SND1, SYNGAP1, ADARB1, SZT2, QRICH1, NOTCH3, NOS1AP, SDHD, KCNQ2, DNAJC19, SYT3, NUP62, GRAMD4, CSNK1E, PLXNA4, RP4-796I17.5, JRK, RAD21L1, SHANK3, PTPN2…	836	410	290	329	0	21	1	blue	0	1	1	0	0	1	43.5707	37.9581	41.1765	0	30.4348	0
NDUFA6	ENSG00000184983	kMEblue, kMEmagenta, kMEturquoise	MAPT, SRGAP3, XPNPEP3, SLC6A17, HTT, SPTAN1, CLASP1, CDC42BPB, MTOR, RUSC2, L1CAM, SREBF2, SRCAP, KIF3C, HUWE1, TCF20, RBX1, EP300, CHD8, EARS2, HDLBP, CHD5, IQSEC2, KDM5C, HERC2, KIF1A, UNC13A, PRRC2B, TRIO, MYH10, DAGLA, PRPF39, NAT8L, TRRAP, PLXNB2, MKL1, C14orf21, SDHA, DYNC1H1, SYNGAP1, ADARB1, SZT2, QRICH1, NOTCH3, NOS1AP, SDHD, KCNQ2, DNAJC19, NUP62, GRAMD4, CSNK1E, PLXNA4, RP4-796I17.5, J…	804	392	285	323	0	21	1	blue,magenta	0	0	0	0	0	1	41.6578	37.3037	40.4255	0	30.4348	0
ATP5L2	ENSG00000249222	kMEblue, kMEturquoise	SRCAP, KIF3C, HUWE1, TCF20, RBX1, EP300, CHD8, EARS2, HDLBP, CHD5, IQSEC2, KDM5C, HERC2, KIF1A, UNC13A, PRRC2B, TRIO, MYH10, DAGLA, PTPN23, UBE2A, CACNA2D2, CAD, CNOT3, SYN1, GNA11, SLC9A1, AARS, ABL1, STX1B, CELSR3, SPECC1L, DEPDC5, CACNA1I, RANGAP1, BRD1, DNAJC5, CLCN6, CD99L2, TSC2, EIF3E, ATP1A3, OGDH, DNM1, RAI1, CNTNAP1, AMBRA1, CHD4, CCNG1, ARID1A, SLC12A5, GLO1, PRR12, AHDC1, APBA2, SMARC…	546	275	196	224	0	15	1	blue	0	0	0	0	0	1	29.2242	25.6545	28.035	0	21.7391	0
AL049757.3	ENSG00000234009	kMEmagenta, kMEturquoise	SRCAP, KIF3C, HUWE1, TCF20, RBX1, EP300, CHD8, EARS2, HDLBP, CHD5, IQSEC2, KDM5C, HERC2, KIF1A, UNC13A, PRRC2B, TRIO, MYH10, DAGLA, JRK, PTPN23, UBE2A, CACNA2D2, CAD, ALG6, CNOT3, SYN1, GNA11, SLC9A1, AARS, ABL1, STX1B, CELSR3, SPECC1L, TOP3B, DEPDC5, PPP6R2, SBF1, CACNA1I, L3MBTL2, RANGAP1, ZC3H7B, BRD1, DNAJC5, GMEB2, CLCN6, CD99L2, TSC2, SLC7A5, FBXO31, EIF3E, MED25, ATP1A3, OGDH, DNM1, ENG, R…	523	260	183	213	0	16	1	magenta	0	0	0	0	0	1	27.6302	23.9529	26.6583	0	23.1884	0
PMM1	ENSG00000100417	kMEblue, kMEpink, kMEtan	CHD8, HERC2, UNC13A, PRRC2B, TRIO, MYH10, BRD1, CLCN6, CHD4, ARID1A, INO80, ZC3H4, DNMT1, COL4A3BP, ST3GAL3, NAA10, SPTLC2, PQBP1, CDK6, GCK, PRUNE2, NDUFS8, C12orf57, NDUFS7, NCAPH2, KPTN, PEX16, CLPP, ITPA, SCO2, EIF3G, CHMP1A, THOC6, DPM2, NPRL2, ZBED4, KIAA0586, ZC3H14, ZMYND8, ADNP, AHCY, HIVEP2, NALCN, HTR2A, FLT1, CTCF, XYLT1, HERC1, DMXL2, SPG11, UBR5, ARHGEF10, LIN7B, RNASEH2A, VRK3, ETF…	511	237	218	205	0	15	2	blue, pink, tan	0	0	0	0	0	1	25.186	28.534	25.6571	0	21.7391	0
TUBGCP6	ENSG00000128159	kMEmagenta, kMEred, kMEturquoise	HERC2, KIF1A, UNC13A, PRRC2B, MYH10, DAGLA, LRRC4, NDUFA5, INO80, DPP6, ACTN4, ZC3H4, DNMT1, PLXNA3, UBA1, KCNC3, CC2D1A, DHX30, B4GALNT1, RNASEH2B, BIN1, STXBP1, KDM6B, CLN6, ADCY4, DOCK6, GTPBP3, NDUFA10, PNPLA7, MRI1, NOL11, HCCS, KRAS, CHST5, DCUN1D1, FLT4, SLC6A8, KCNC1, TRAF3, DIAPH1, UNC79, IER3IP1, PHF21A, CIDEB, TOR1A, CDK5RAP2, POMT1, RAF1, RAB11FIP5, RAC1, TBC1D23, POT1, PXDN, SNX14, S…	533	217	181	210	0	18	6	magenta, red	0	1	0	0	0	1	23.0606	23.6911	26.2829	0	26.087	0
L3MBTL2	ENSG00000100395	kMEmagenta, kMEturquoise	CHD8, EARS2, HDLBP, CHD5, IQSEC2, KDM5C, HERC2, KIF1A, UNC13A, PRRC2B, TRIO, MYH10, DAGLA, RANGAP1, ZC3H7B, BRD1, TELO2, DNAJC5, GMEB2, CLCN6, SLC35A2, CD99L2, PORCN, TSC2, SLC7A5, FBXO31, BCKDK, EIF3E, MED25, GPI, ATP1A3, OGDH, TAF6, DNM1, ENG, RAI1, CNTNAP1, EFTUD2, AMBRA1, CHD4, ATN1, CCNG1, CRBN, MOGS, AMPD2, DLGAP3, ARID1A, CTSD, GRN, SLC12A5, PNPLA6, GLO1, MBOAT7, PRR12, AHDC1, APBA2, SMARC…	404	177	137	166	0	10	1	turquoise	0	0	0	0	0	1	18.8098	17.9319	20.776	0	14.4928	0
TSPO	ENSG00000100300	kMEblue, kMEpink	RBX1, EP300, CHD8, KDM5C, HERC2, UNC13A, PRRC2B, TRIO, MYH10, CHD4, ARID1A, INO80, STXBP1, COL4A3BP, NAA10, PQBP1, NDUFS8, C12orf57, NDUFS7, KPTN, PEX16, CLPP, ITPA, SCO2, EIF3G, THOC6, TXN2, TNRC6B, UBE3C, PHF5A, PMM1, KIAA0586, AHCY, HIVEP2, NALCN, HTR2A, CTCF, XYLT1, HERC1, DMXL2, LIN7B, RNASEH2A, ETFB, SLC25A39, ETHE1, ATRNL1, B9D1, WHSC1, CBL, ZBTB24, RAD50, NRXN3, DGUOK, BIRC6, RAB3GAP1, SO…	312	165	130	124	0	10	8	pink	0	0	0	0	0	1	17.5345	17.0157	15.5194	0	14.4928	0
ALG12	ENSG00000182858	kMEred	MAPT, SRGAP3, XPNPEP3, SLC6A17, HTT, SPTAN1, CLASP1, CDC42BPB, MTOR, RUSC2, L1CAM, SREBF2, SRCAP, KIF3C, HUWE1, TCF20, RBX1, EP300, CHD8, HDLBP, CHD5, IQSEC2, KDM5C, HERC2, KIF1A, UNC13A, PRRC2B, MYH10, DAGLA, RBM10, ATP6AP1, BCOR, EP400, RP5-821D11.7, PLA2G6, MED12, BRF1, PRPF39, NAT8L, KCNJ11, TRRAP, PLXNB2, MKL1, SDHA, DYNC1H1, SND1, ADARB1, ATAD3A, SZT2, QRICH1, NOTCH3, SDHD, KCNQ2, FAM116B, …	350	152	117	150	0	9	1	turquoise	0	1	1	0	0	1	16.153	15.3141	18.7735	0	13.0435	0
FAM116B	ENSG00000205593	kMEgreenyellow, kMEpurple, kMEred	SRCAP, KIF3C, CHD5, IQSEC2, KDM5C, KIF1A, PRRC2B, DAGLA, DNAJC19, SYT3, NUP62, GRAMD4, CSNK1E, XX-C283C717.1, RAD21L1, SHANK3, PTPN23, CIC, DLGAP4, PLOD1, CAD, PIGQ, ALG6, CNOT3, SYN1, GNA11, STX1B, CELSR3, PPP6R2, SBF1, LMF2, TTLL12, CACNA1I, L3MBTL2, RANGAP1, ZC3H7B, TELO2, DNAJC5, CHRNA4, GMEB2, SLC35A2, CD99L2, PORCN, TSC2, SLC7A5, FBXO31, BCKDK, MED25, GPI, ATP1A3, OGDH, TAF6, ENG, RAI1, CNT…	356	149	125	145	0	6	1	turquoise	0	0	0	0	0	1	15.8342	16.3613	18.1477	0	8.69565	0
TTLL12	ENSG00000100304	kMEgreenyellow, kMEred	HDLBP, CHD5, IQSEC2, KDM5C, HERC2, KIF1A, UNC13A, PRRC2B, MYH10, DAGLA, CACNA1I, L3MBTL2, RANGAP1, ZC3H7B, TELO2, DNAJC5, CHRNA4, GMEB2, CLCN6, SLC35A2, CD99L2, PORCN, TSC2, SLC7A5, FBXO31, BCKDK, EIF3E, MED25, GPI, ATP1A3, OGDH, TAF6, DNM1, ENG, RAI1, CNTNAP1, AMBRA1, ATN1, CCNG1, CRBN, MOGS, AMPD2, DLGAP3, CTSD, GRN, SLC12A5, PNPLA6, GLO1, MBOAT7, PRR12, AHDC1, APBA2, SMARCA4, KDM4B, TICAM1, TU…	308	138	102	126	0	9	11	greenyellow	0	0	0	0	0	1	14.6652	13.3508	15.7697	0	13.0435	0
LMF2	ENSG00000100258	kMEgreenyellow, kMEmagenta, kMEred	CHD5, IQSEC2, KDM5C, KIF1A, DAGLA, TTLL12, L3MBTL2, RANGAP1, ZC3H7B, TELO2, GMEB2, SLC35A2, CD99L2, PORCN, TSC2, SLC7A5, FBXO31, BCKDK, EIF3E, MED25, GPI, OGDH, TAF6, DNM1, ENG, RAI1, CNTNAP1, ATN1, CCNG1, CRBN, MOGS, AMPD2, CTSD, GRN, PNPLA6, GLO1, MBOAT7, AHDC1, APBA2, SMARCA4, TICAM1, TUBGCP6, NDUFA5, ACTN4, DNMT1, PLXNA3, UBA1, CC2D1A, DHX30, RTN4R, B4GALNT1, BIN1, ARSA, SGSM3, KIAA0930, ST13…	329	122	124	131	0	9	6	red	0	0	0	0	0	1	12.9649	16.2304	16.3955	0	13.0435	0
ARFGAP3	ENSG00000242247	kMEyellow	MYO16, DLG1, SLC25A24, RBM27, RAB18, MIB1, KATNAL1, NBN, TMEM106B, SHOC2, MED13, PRKAR1A, ZMYND11, RAB23, AGPS, COL4A3BP, PDE4D, CPEB4, SPAST, UBE3A, GPD2, PAPOLG, DCAF17, PTBP2, CAMSAP2, PIK3CA, VIL1, CUL3, RLIM, KRAS, CHL1, SYNCRIP, CAPRIN1, USP15, DCUN1D1, IGF1, PCDHAC1, PCDHA11, PCDHA10, PCDHA12, PCDHA3, PCDHA6, SOX5, PAK3, SMARCA2, GSK3B, ATRX, ZC3H14, YY1, RPGRIP1L, SOS1, MARK1, KDM5B, ATP8…	171	115	57	50	0	6	3	brown	0	0	0	0	0	1	12.221	7.46073	6.25782	0	8.69565	0
C22orf40	ENSG00000205643	kMEpink	HUWE1, RBX1, EP300, CHD8, HERC2, MYH10, DLG1, POMGNT1, KATNAL1, NPRL3, MED13, COL4A3BP, PIK3CA, RLIM, NAA10, PQBP1, GCK, NDUFS8, C12orf57, NDUFS7, NCAPH2, KPTN, CLPP, ITPA, SCO2, THOC6, DPM2, HMBS, NPRL2, NDUFS3, ZNF407, ERCC6, GPX1, ACY1, ALG11, PRKDC, APOPT1, GTF2I, PAFAH1B1, AP4E1, GSK3B, KAT6A, FTL, COQ9, NRCAM, CDKL5, NUP50, ADAM22, BTAF1, TSPO, TXN2, TNRC6B, PHF5A, PMM1, KIAA0586, AHCY, NAL…	221	104	102	91	0	6	8	pink	0	0	0	0	0	1	11.0521	13.3508	11.3892	0	8.69565	0
CHKB	ENSG00000100288	kMEcyan	TRMU, PPPDE2, MIB1, TAZ, MKS1, KATNAL1, COG4, NBN, PIGL, MED13, MTMR11, PRKAR1A, ZMYND11, AGPS, COL4A3BP, PDE4D, CPEB4, UBE3A, CLCN2, CAMSAP2, ABCD4, PIK3CA, ST3GAL3, CUL3, NDUFA10, MRI1, RLIM, KRAS, CHL1, SYNCRIP, NAA10, NPRL2, AP4B1, SOX5, IFT27, UBE3C, NALCN, MTFMT, DMXL2, VRK3, ETHE1, POLR3B, B9D1, FOXRED1, CBL, NRXN3, MPV17, RAB3GAP1, SOS1, MARK1, ASH1L, DNAJC6, AKT3, LPHN2, KDM5B, SLC16A7, …	216	98	92	89	0	7	14	cyan	1	1	1	0	0	1	10.4145	12.0419	11.1389	0	10.1449	0
SCO2	ENSG00000130489	kMEpink	EIF3G, CHMP1A, THOC6, DPM2, SYNE1, NDUFA2, VPS13B, UNC79, CARS2, PNKP, YTHDC2, UBL7, SLC12A6, NTRK3, TSPAN17, PPOX, HAX1, ACTA1, LYST, PSEN2, EXOC6B, UNC80, ANK2, NHP2, TBC1D7, FARS2, PHIP, NDUFB11, TAF1, EBP, RPL10, FAM135B, ATM, B3GAT3, DUSP15, ANK3, UPF2, SACS, DST, EPG5, RANBP2, TRIP12, CHD1, UBN2, PEX10, SYNJ1, SON, UBR1, SQSTM1, THAP8, WDR26, SCNM1, WDFY3, ATXN7, CDK13, NIPBL, UQCRQ, CDK5, …	251	92	117	97	0	4	8	pink	0	0	1	0	0	1	9.77683	15.3141	12.1402	0	5.7971	0
ARSA	ENSG00000100299	kMEred	DAGLA, TTLL12, L3MBTL2, RANGAP1, TELO2, PORCN, TSC2, BCKDK, EIF3E, MED25, GPI, TAF6, RAI1, MOGS, AMPD2, CTSD, GRN, PNPLA6, GLO1, MBOAT7, AHDC1, APBA2, TUBGCP6, NDUFA5, ACTN4, PLXNA3, UBA1, CC2D1A, DHX30, B4GALNT1, BIN1, SGSM3, POMT2, HDAC10, MLXIPL, TAZ, NPRL3, TAF1C, RAB2A, DMPK, AKT2, BRAT1, TMEM106B, KCNT1, LZTS2, SHOC2, RAB23, AGPS, PPP2CA, SPAST, UBE3A, PAPOLG, PTBP2, CAMSAP2, ELOVL4, STRADA…	222	85	81	85	0	9	6	red	0	1	0	1	0	1	9.03294	10.6021	10.6383	0	13.0435	0
CPT1B	ENSG00000205560	kMEcyan	TUBGCP6, CYP2D7P1, NRAS, LAT, LTB4R, GALT, DLG1, CHKB-CPT1B, RTEL1, RABL2B, SLC25A24, POMGNT1, RBM27, UNC13D, HDAC6, AAAS, CYP2D6, CHKB, KIAA0930, FAM118A, POMT2, TRMU, PPPDE2, MLXIPL, NINL, MIB1, TAZ, MKS1, KATNAL1, COG4, TAF1C, NBN, AKT2, TMEM106B, SHOC2, PIGL, MED13, MTMR11, PRKAR1A, GABRA4, CEP164, ZMYND11, RAB23, AGPS, PDE4D, PPP2CA, CPEB4, UBE3A, CLCN2, GPD2, PAPOLG, DCAF17, CAMSAP2, ELOVL4…	206	85	68	70	0	9	14	cyan	0	0	0	0	0	1	9.03294	8.90052	8.76095	0	13.0435	0
PRR5	ENSG00000186654	kMEpink, kMEsalmon	CLASP1, MTOR, HUWE1, TRRAP, TUBB3, SAMD11, CARD9, CTA-250D10.15, MCAT, PQBP1, CORO1A, PRUNE2, NDUFS8, C12orf57, KPTN, PEX16, CLPP, ITPA, KLF16, SCO2, EIF3G, CHMP1A, DLG4, DPM2, PTPRT, NF1, SCN8A, LRBA, MBD5, NDUFS3, GPX1, PRKDC, DDHD2, FTL, NRCAM, KRIT1, NUP50, COMT, ADAM22, BTAF1, WAC, TXN2, TNRC6B, PMM1, KIAA0586, AHCY, HERC1, DMXL2, UBR5, LIN7B, RNASEH2A, MPDZ, ATRNL1, KCNA1, MED23, ZBTB24, RA…	165	78	65	74	0	3	8	pink	0	0	0	0	0	1	8.28905	8.50785	9.26158	0	4.34783	0
RP3-402G11.5	ENSG00000073169	kMEbrown, kMEred	SREBF2, ATAD3A, SZT2, FAM116B, CSNK1E, XX-C283C717.1, PTPN23, CAD, PIGQ, CNOT3, STX1B, CELSR3, TOP3B, PPP6R2, LMF2, TTLL12, L3MBTL2, RANGAP1, TELO2, TSC2, BCKDK, MED25, TAF6, MOGS, AMPD2, PNPLA6, GLO1, TUBGCP6, PLXNA3, CC2D1A, DHX30, BIN1, C1orf70, TRIM33, ZNF517, OPA1, COL11A2, CPT1B, CYP2D7P1, RNPS1, TSN, NRAS, LAT, RP4-669P10.16, DLG1, RTEL1, GNAS, RBM27, HDAC6, AAAS, RAB18, LZTR1, CYP2D6, ARS…	207	77	83	76	0	7	6	red	0	0	0	0	0	1	8.18278	10.8639	9.51189	0	10.1449	0
PANX2	ENSG00000073150	kMEgreenyellow	SLC6A17, RUSC2, L1CAM, SREBF2, SRCAP, CHD5, IQSEC2, KDM5C, KIF1A, DAGLA, MKL1, SDHA, ATAD3A, FAM116B, SYT3, CSNK1E, SHANK3, PTPN23, CIC, DLGAP4, PIGQ, CNOT3, GNA11, STX1B, PPP6R2, SBF1, TTLL12, CACNA1I, L3MBTL2, RANGAP1, ZC3H7B, TELO2, DNAJC5, GMEB2, CD99L2, TSC2, SLC7A5, FBXO31, MED25, GPI, ATP1A3, TAF6, RAI1, CNTNAP1, AMBRA1, ATN1, MOGS, AMPD2, DLGAP3, GRN, PNPLA6, PRR12, AHDC1, APBA2, SMARCA4,…	160	76	47	63	0	4	11	greenyellow	0	0	0	0	0	1	8.07651	6.15183	7.88486	0	5.7971	0
MAPK11	ENSG00000185386	kMEbrown	SZT2, CAD, PIGQ, TOP3B, LMF2, MOGS, GLO1, TUBGCP6, CC2D1A, ACADVL, MAPK12, RP3-402G11.5, TRIM33, OPA1, COL11A2, CPT1B, RNPS1, NRAS, GALT, DLG1, CHKB-CPT1B, RTEL1, SLC25A24, POMGNT1, RBM27, AAAS, RAB18, ARSA, TRMU, HDAC10, MLXIPL, MIB1, TAZ, KATNAL1, NPRL3, TAF1C, NBN, RAB2A, TMEM106B, KCNT1, SHOC2, MED13, PRKAR1A, GABRA4, ZMYND11, RAB23, AGPS, PDE4D, PPP2CA, CPEB4, SPAST, UBE3A, GPD2, PAPOLG, DCA…	157	73	59	52	0	6	3	brown	0	0	0	0	0	1	7.7577	7.72251	6.50814	0	8.69565	0
MAPK12	ENSG00000188130	kMEbrown, kMEpink, kMEred	FAM116B, PIGQ, LMF2, TELO2, BCKDK, MOGS, CC2D1A, C1orf70, RP3-402G11.5, TRIM33, ZNF517, OPA1, CPT1B, RNPS1, NRAS, GALT, DLG1, CHKB-CPT1B, RTEL1, SLC25A24, POMGNT1, RBM27, LZTR1, CHKB, ARSA, SGSM3, TRMU, HDAC10, MIB1, TAZ, KATNAL1, COG4, NPRL3, NBN, DMPK, BRAT1, TMEM106B, SHOC2, MED13, PRKAR1A, ZMYND11, AGPS, COL4A3BP, PDE4D, CPEB4, SPAST, UBE3A, CLCN2, PAPOLG, CAMSAP2, PIK3CA, ST3GAL3, IDUA, CUL3…	200	70	94	80	0	6	6	red	1	0	0	0	0	1	7.43889	12.3037	10.0125	0	8.69565	0
CYB5R3	ENSG00000100243	kMEgreenyellow	IQSEC2, KIF1A, DAGLA, LMF2, TTLL12, RANGAP1, TELO2, GMEB2, PORCN, TSC2, SLC7A5, BCKDK, MED25, TAF6, ENG, ATN1, MOGS, AMPD2, CTSD, GRN, PNPLA6, MBOAT7, PRR12, AHDC1, APBA2, SMARCA4, KDM4B, UBA1, CC2D1A, DHX30, AGAP2, BIN1, ABCD1, GRIK5, SLC4A3, TRAF7, ARSA, NPRL3, BRAT1, ERCC2, DVL1, NDUFS7, STK11, MAP2K2, KLF16, CHADL, MAN2B1, GYS1, PIGT, PEPD, POLR3H, NAGLU, MVK, B4GALT7, THRA, MAPK8IP2, ACO2, A…	155	56	57	59	0	4	11	greenyellow	0	0	0	0	0	1	5.95112	7.46073	7.38423	0	5.7971	0
TRMU	ENSG00000100416	kMEcyan	TUBGCP6, PPPDE2, MLXIPL, MIB1, TAZ, MKS1, KATNAL1, TAF1C, NBN, RAB2A, AKT2, TMEM106B, SHOC2, PIGL, MED13, MTMR11, PRKAR1A, GABRA4, CEP164, ZMYND11, RAB23, AGPS, PDE4D, PPP2CA, CPEB4, SPAST, UBE3A, CLCN2, GPD2, PAPOLG, CAMSAP2, ABCD4, PIK3CA, STRADA, IDUA, CUL3, ADCY4, NDUFA10, MRI1, RLIM, KRAS, CHL1, CAPRIN1, USP15, DCUN1D1, NAA10, NPRL2, SOX5, SCN2A, VARS2, EXOC6, RB1, RRM2B, PPOX, XPR1, FBXO28,…	138	52	54	53	0	7	14	cyan	0	0	0	0	0	1	5.52604	7.06806	6.63329	0	10.1449	0
HDAC10	ENSG00000100429	kMEred	TELO2, BCKDK, MED25, TAF6, MOGS, AMPD2, TUBGCP6, CC2D1A, TRAF7, MIB1, KATNAL1, COG4, NPRL3, TAF1C, DMPK, AKT2, BRAT1, TMEM106B, SHOC2, PRKAR1A, AGPS, CPEB4, CAMSAP2, PIK3CA, ST3GAL3, IDUA, GTPBP3, RLIM, KRAS, DCUN1D1, NAA10, CORO1A, ERCC2, DVL1, NDUFS8, NDUFS7, NCAPH2, STK11, MAP2K2, SCO2, THOC6, DPM2, SLC25A39, GALE, GSS, EMD, SEPSECS, MVK, B4GALT7, PEX6, THRA, PNKP, PRKAA1, COG6, DDX11, VARS2, …	143	45	65	54	0	3	6	red	0	0	0	0	0	1	4.78215	8.50785	6.75845	0	4.34783	0
KIAA0930	ENSG00000100364	kMEred	TSC2, MOGS, GLO1, TUBGCP6, NDUFA5, INO80, PLXNA3, CC2D1A, BIN1, POMT2, NINL, TAZ, TAF1C, RAB2A, DMPK, AKT2, TMEM106B, LZTS2, GABRA4, CEP164, PPP2CA, CLCN2, ELOVL4, ABCD4, STRADA, IDUA, ADCY4, DOCK6, GTPBP3, PNPLA7, HCCS, KRAS, ARHGEF10, YWHAE, CEP104, KIAA1267, PHF21A, CDK5RAP2, VARS2, IFT172, KIAA0556, POLG, COL6A1, TMCO1, SETDB1, POGZ, TPM3, CALM2, KIAA0226, SLC26A1, GIGYF1, INPP5E, PGAP2, DLAT…	119	40	46	46	0	4	6	red	0	0	0	0	0	1	4.2508	6.02094	5.7572	0	5.7971	0
PRR5-ARHGAP8	ENSG00000248405	kMEpink	MCAT, PQBP1, CORO1A, PPP2R1A, PRUNE2, NDUFS8, C12orf57, KPTN, PEX16, CLPP, ITPA, KLF16, SCO2, EIF3G, CHMP1A, DLG4, DPM2, DDHD2, KRIT1, COMT, ADAM22, BTAF1, TXN2, PMM1, AHCY, LIN7B, RNASEH2A, ATRNL1, KCNA1, ZBTB24, RAD50, ASH1L, MLL, TTC21B, ARFGEF2, MPDU1, GAMT, APOE, UNC79, TNNT1, GABRG2, SIL1, USP45, AHI1, RBP4, ARHGAP24, TSPAN17, ARHGDIA, LYST, SCN1A, UNC80, NHP2, NDUFB11, TAF1, EBP, NSDHL, FA…	108	40	45	51	0	2	8	pink	0	0	0	0	0	1	4.2508	5.89005	6.38298	0	2.89855	0
MCAT	ENSG00000100294	kMEgreenyellow, kMEpink	TELO2, PIK3R2, GRIK5, SLC4A3, SGSM3, EEF1A2, PQBP1, CORO1A, ERCC2, PPP2R1A, CDK6, NDUFS8, C12orf57, NDUFS7, NCAPH2, STK11, KPTN, PEX16, CLPP, ITPA, MAP2K2, SCO2, EIF3G, CHMP1A, THOC6, DLG4, DPM2, PEPD, TXN2, TNRC6B, PMM1, KIAA0586, AHCY, UBR5, LIN7B, MPDZ, RAD50, BIRC6, ASH1L, MTR, MLL, TAF1L, GIPC1, THOC2, SNRPB, MPDU1, GAMT, NDUFA2, VPS13B, BAZ2B, EMD, B4GALT7, PNKP, UBL7, KATNB1, TSPAN17, ARHG…	114	34	54	53	0	2	11	greenyellow	0	0	0	0	0	1	3.61318	7.06806	6.63329	0	2.89855	0
NCAPH2	ENSG00000025770	kMEgreenyellow, kMEpink	TRAF7, ST3GAL3, STK11, KPTN, PEX16, CLPP, ITPA, MAP2K2, SCO2, EIF3G, CHMP1A, THOC6, DPM2, PEPD, GIPC1, ASL, MPDU1, GAMT, NDUFA2, B4GALT7, THRA, PNKP, NR1D1, UBL7, KATNB1, TSPAN17, PEX14, PPOX, LYST, PSEN2, NHP2, NDUFB11, RPL10, DGKZ, B3GAT3, PEX10, CTBP1, RECQL4, THAP8, IGSF8, WDFY3, ATXN7, CDK5, C7orf55, APBB1, PHB, ROGDI, GPX4, CDT1, PDZD4, NDUFV1, RBPJ, THAP11, CSDC2, RNASEH2C, HRAS, COX8A, AC…	125	34	58	47	0	2	8	pink	0	0	0	0	0	1	3.61318	7.59162	5.88235	0	2.89855	0
ARHGAP8	ENSG00000241484	kMEpink	PQBP1, CORO1A, PRUNE2, NDUFS8, C12orf57, KPTN, PEX16, CLPP, ITPA, KLF16, SCO2, CHMP1A, DLG4, DPM2, DDHD2, KRIT1, COMT, ADAM22, TXN2, PMM1, AHCY, LIN7B, RNASEH2A, ATRNL1, KCNA1, ZBTB24, RAD50, ASH1L, MLL, TTC21B, ARFGEF2, MPDU1, GAMT, APOE, UNC79, PRR5-ARHGAP8, TNNT1, GABRG2, SIL1, USP45, RBP4, ARHGAP24, TSPAN17, ARHGDIA, LYST, SCN1A, UNC80, NHP2, NDUFB11, EBP, NSDHL, FAM135B, B3GAT3, MPP7, ITPR1,…	97	33	41	45	0	2	8	pink	0	0	0	0	0	1	3.50691	5.36649	5.63204	0	2.89855	0
MLC1	ENSG00000100427	kMEgreen, kMEsalmon	APOE, ZNF423, GLI3, ATP1A2, PARD3B, ARHGAP31, FGFRL1, HFE, LAMA1, MID1, CHRDL1, ABHD5, EYA1, CD38, SLC1A2, KAT2B, DOCK7, PPP1R3C, CXCR4, SARDH, MASP1, MCCC2, PSAT1, GLUL, KCTD3, OTX1, TUBB2B, YAP1, SLC13A5, RIT1, ZNF385B, GLRA1, MSN, ERLIN2, NTRK2, GLUD1, ADD3, FREM2, SLC7A11, EPS8, GJA1, CPT2, MEGF11, ALDH4A1, CBS, NFIA, GPR98, ALDH7A1, GJB2, HEPACAM, GPT2, FGFR3, SDC2, EMX2, MTM1, MCC, GATM, AQ…	91	30	37	35	0	7	5	green	0	1	0	1	0	1	3.1881	4.84293	4.38048	0	10.1449	0
FAM118A	ENSG00000100376	kMEcyan	TUBGCP6, POMT2, MLXIPL, NINL, TAZ, MKS1, TAF1C, AKT2, KCNT1, MTMR11, CEP164, CLCN2, ABCD4, STRADA, IDUA, ADCY4, PNPLA7, KRAS, KIAA1267, SLC7A6OS, KIAA0556, TPM3, AMT, GIGYF1, PGAP2, DLAT, FLCN, PCNT, ERCC3, TK2, MBD6, COQ4, COG7, GUSB, STAT2, TRABD, ABCC8, PIGG, BBS1, MTHFR, WDR73, CTC1, PACS2, TSEN54, RRP7B, ACADVL, C15orf62, MAN2A2, SZT2, COL11A2, PCDHA9, PCDHA8, PCDHA7, PCDHA5, PCDHA4, PCDHA2,…	74	26	21	28	0	2	14	cyan	0	0	0	0	0	1	2.76302	2.74869	3.50438	0	2.89855	0
RABL2B	ENSG00000079974	kMEcyan	TUBGCP6, POMGNT1, RBM27, UNC13D, AAAS, CHKB, FAM118A, POMT2, TRMU, PPPDE2, MLXIPL, MIB1, TAZ, MKS1, KATNAL1, TAF1C, AKT2, PIGL, MED13, MTMR11, PRKAR1A, CEP164, AGPS, CPEB4, CLCN2, CAMSAP2, ABCD4, STRADA, IDUA, ADCY4, NDUFA10, MRI1, KRAS, CWF19L1, NPRL2, AP4B1, FOXRED1, COQ6, VARS2, PPOX, GMPPA, AMT, KIAA2022, GIGYF1, PGAP2, TMEM138, DLAT, MMAA, GUCY1A2, HOMER1, CACNA2D1, FLCN, GNAQ, DHRS1, FTCD, …	85	21	34	36	0	4	14	cyan	0	0	0	0	0	1	2.23167	4.45026	4.50563	0	5.7971	0
RP1-257I20.13	ENSG00000213790	kMEmagenta	SRCAP, HUWE1, TCF20, RBX1, EP300, CHD8, CHD5, IQSEC2, KDM5C, HERC2, KIF1A, UNC13A, PRRC2B, MYH10, DAGLA, PLXNA4, RP4-796I17.5, JRK, PTPN23, UBE2A, CACNA2D2, CAD, CNOT3, SLC9A1, ABL1, STX1B, CELSR3, SPECC1L, DEPDC5, CACNA1I, RANGAP1, BRD1, GMEB2, CLCN6, TSC2, SLC7A5, EIF3E, MED25, DNM1, ENG, RAI1, CNTNAP1, CHD4, CCNG1, CRBN, ARID1A, SLC12A5, GLO1, PRR12, AHDC1, APBA2, SMARCA4, TUBGCP6, LRRC4, NDUF…	258	128	94	110	0	6	9	magenta	0	0	0	0	0	1	13.6026	12.3037	13.7672	0	8.69565	NA
CHKB-CPT1B	ENSG00000254413	kMEcyan	RTEL1, RABL2B, SLC25A24, POMGNT1, RBM27, UNC13D, AAAS, CHKB, FAM118A, TRMU, PPPDE2, MIB1, TAZ, MKS1, KATNAL1, COG4, TAF1C, NBN, SHOC2, PIGL, MED13, MTMR11, PRKAR1A, GABRA4, ZMYND11, RAB23, AGPS, COL4A3BP, PDE4D, CPEB4, UBE3A, CLCN2, PAPOLG, CAMSAP2, ABCD4, PIK3CA, CUL3, ADCY4, NDUFA10, MRI1, RLIM, KRAS, CHL1, SYNCRIP, CAPRIN1, NAA10, HMBS, PCDHA6, CWF19L1, NPRL2, AP4B1, SOX5, PAK3, SMARCA2, GSK3B…	170	68	73	65	0	7	14	cyan	0	0	0	0	0	1	7.22635	9.55497	8.13517	0	10.1449	NA
RRP7B	ENSG00000182841	kMEcyan	SZT2, TUBGCP6, MAPK11, ACADVL, C15orf62, RP3-402G11.5, TRIM33, OPA1, COL11A2, CPT1B, CYP2D7P1, NRAS, LAT, GALT, DLG1, CHKB-CPT1B, RTEL1, RABL2B, SLC25A24, POMGNT1, RBM27, UNC13D, HDAC6, AAAS, RAB18, CYP2D6, CHKB, FAM118A, POMT2, TRMU, PPPDE2, MLXIPL, MIB1, TAZ, MKS1, KATNAL1, TAF1C, NBN, RAB2A, AKT2, TMEM106B, SHOC2, PIGL, MED13, MTMR11, PRKAR1A, GABRA4, CEP164, ZMYND11, RAB23, AGPS, PDE4D, PPP2C…	151	63	54	50	0	7	14	cyan	0	0	0	0	0	1	6.69501	7.06806	6.25782	0	10.1449	NA
CYP2D7P1	ENSG00000205702	kMEcyan, kMEred	CAD, TOP3B, GLO1, TUBGCP6, CC2D1A, NRAS, LAT, LTB4R, GALT, FARP2, CHKB-CPT1B, RTEL1, RABL2B, SLC25A24, RBM27, UNC13D, HDAC6, AAAS, RAB18, MYO9B, CYP2D6, CHKB, ARSA, KIAA0930, FAM118A, POMT2, TRMU, MLXIPL, NINL, MIB1, TAZ, MKS1, KATNAL1, TAF1C, NBN, RAB2A, AKT2, TMEM106B, KCNT1, SHOC2, PIGL, MED13, MTMR11, PRKAR1A, GABRA4, CEP164, PDHX, ZMYND11, RAB23, AGPS, PDE4D, PPP2CA, CPEB4, SPAST, UBE3A, CLC…	150	57	53	53	0	7	14	cyan	0	0	0	0	0	1	6.05739	6.93717	6.63329	0	10.1449	NA
RP11-398F12.1	ENSG00000231711	kMEcyan	TUBGCP6, CHKB-CPT1B, RTEL1, UNC13D, AAAS, MYO9B, POMT2, TAZ, TAF1C, AKT2, MTMR11, CEP164, RAB23, AGPS, UBE3A, CLCN2, CAMSAP2, ELOVL4, ABCD4, CUL3, PNPLA7, KRAS, CAPRIN1, PCDHA13, PCDHAC1, PCDHA11, PCDHA10, PCDHA12, PCDHA3, PCDHA6, PCDHAC2, EXOC6, XPR1, AMT, EPHA5, KIAA2022, GIGYF1, PGAP2, TMEM138, DLAT, MMAA, CAMK4, CACNA2D1, FLCN, GNAQ, MBD6, COQ4, COG7, FSTL5, ACSL4, NLGN1, GUSB, STAT2, PTEN, N…	75	33	22	30	0	3	14	cyan	0	0	0	0	0	1	3.50691	2.87958	3.75469	0	4.34783	NA

## Sheet: Table S2
Table S2. List of known genes associated with five neurological phenotypes, including autism spectrum disorder (ASD), intellectual disability (ID), seizures, language impairment and hypotonia.
Genes - ASD	Genes - ID	Genes - Seizures	Genes - Hypotonia	Genes - Language impairment
ABCA10	AAAS	AAAS	ABAT	ABCC4
ABCA13	AASS	AARS	ABCD4	ADCY4
ABCA7	ABCC8	AASS	ABL1	ALDH5A1
ACE	ABCC9	ABAT	ACADS	AMMECR1
ACHE	ABCD1	ABCC8	ACADVL	APOE
ADA	ABCD4	ABHD12	ACTA1	APP
ADARB1	ABHD5	ACADS	ADCY5	AQP4
ADCY3	ACAT1	ACADSB	ADNP	ATP2C2
ADCY5	ACO2	ACMSD	AHDC1	AVPR1A
ADK	ACSF3	ACO2	AHI1	BCL2
ADNP	ACSL4	ACOT7	ALDH5A1	BDNF
ADORA3	ACTB	ACOX1	AMMECR1	BRAF
ADSL	ACTG1	ACSF3	AMT	C9orf72
AFF2	ACVR1	ACTB	AP4B1	CACNA1C
AFF4	ACY1	ACTG1	AP4E1	CCKAR
AGAP1	ADAR	ACVR1	AP4M1	CFTR
AGAP2	ADAT3	ACY1	AP4S1	CIDEB
AGBL4	ADGRG1	ADAM22	ARID1B	CMIP
AGMO	ADNP	ADD3	ARL13B	CNTNAP2
AGO1	ADSL	ADK	ARSA	COMT
AGTR2	AFF2	ADNP	ASNS	DAOA
AHDC1	AFF4	ADORA2A	ASPA	DCX
AHI1	AGA	ADRA2 B	ATAD3A	DHRS1
AKAP9	AGK	ADRA2B	ATP1A3	DHX30
ALDH1A3	AGPAT2	ADSL	ATP2B3	DRD2
ALDH5A1	AHCY	AFG3L2	ATP8A2	DTNBP1
AMPD1	AHDC1	AGL	ATRX	ELP4
AMT	AHI1	AGPS	ATXN1	FMR1
ANK2	AIFM1	AGTR2	ATXN7	FOXE1
ANK3	AIMP1	AHI1	B9D1	FOXG1
ANKRD11	AKT1	AIFM1	BCL11A	FOXP1
ANXA1	AKT3	AIMP1	BCS1L	FOXP2
AP1S2	ALDH18A1	AKT2	BTD	GATM
APBA2	ALDH3A2	AKT3	CACNA1D	gene_symbol
APBB1	ALDH4A1	ALDH18A1	CAMKMT	GJB2
APC	ALDH5A1	ALDH4A1	CAPZB	GNB5
APH1A	ALDH7A1	ALDH7A1	CASK	GRIN2B
ARHGAP15	ALDOB	ALG1	CC2D2A	GRN
ARHGAP24	ALG1	ALG11	CCDC174	GSTT1
ARHGAP32	ALG12	ALG12	CDKL5	HERC2
ARHGAP33	ALG13	ALG13	CDKN1C	HFE
ARHGAP5	ALG2	ALG2	CEP104	INHBA
ARHGEF10	ALG3	ALG3	CEP120	KRAS
ARHGEF9	ALG6	ALG6	CEP290	KRT18P13
ARID1B	ALX1	ALG9	CEP41	LRRK2
ARNT2	ALX3	AMACR	CFL2	LTB4R
ARX	ALX4	AMER1	CHD2	MAGEL2
ABAT	AMPD2	AMPD2	CHRNA7	MAOA
ACTN4	AMT	AMT	CLPB	MAPT
ACY1	ANK3	ANK3	CNTNAP1	MECP2
ADAMTS18	ANKRD11	ANKH	COA7	MKRN3
ADORA2A	ANO10	ANKLE2	COA8	MPO
ADRB2	AP1S2	ANO10	COL5A1	NDN
AGO3	AP3B1	ANOS1	COL6A1	NFXL1
AGO4	AP4B1	AP1S2	COL6A2	NLRP3
ALG6	AP4M1	AP3D1	COL6A3	NOP9
ALOX5AP	AP4S1	AP4B1	COQ2	NOS3
AMBRA1	APOPT1	APOE4	COQ4	NPAP1
ANKS1B	APTX	APOPT1	COQ6	NR4A2
APP	ARFGEF2	APP	COQ7	OPRM1
ARHGAP11B	ARG1	ARFGEF2	COQ8A	PCDH19
ASAP2	ARHGAP11A	ARG1	COQ9	PLAU
ASH1L	ARHGAP31	ARHGDIA	COX10	PRKN
ASMT	ARHGEF9	ARHGEF15	COX14	PSEN1
ASPM	ARID1A	ARHGEF9	COX15	PSEN2
AR	ARID1B	ARID1A	COX20	PTEN
ASS1	ARL13B	ARID1B	COX6B1	PTPN11
ASTN2	ARL6	ARNT2	COX8A	PWAR1
ASXL3	ARSA	ARV1	CPLANE1	PWRN1
ATG7	ARSB	ARX	CPLX1	SETBP1
ATP10A	ARSE	ASAH1	CSPP1	SGCE
ATP1A3	ARX	ASNS	CTBP1	SHBG
ATP2B2	ASAH1	ASPM	D2HGDH	SIM1
ATP6V0A2	ASL	ASXL1	DEL2P21	SNORD115-1
ATP8A1	ASNS	ATIC	DEL9P	SNORD116-1
ATRNL1	ASPA	ATN1	DGUOK	SNRPN
ATRX	ASPM	ATP13A2	DMPK	SOD1
ATXN7	ASS1	ATP1A2	DOCK3	SRCAP
AUTS2	ASXL1	ATP1A3	EBF3	TCF4
AVP	ASXL3	ATP5A1	EBP	TM4SF20
AVPR1A	ATIC	ATP6	EHMT1	TMEM106B
AVPR1B	ATM	ATP6AP1	ELN	TXN
AZGP1	ATP13A2	ATP6AP2	ELP1	UBE3A
BAIAP2	ATP1A2	ATP6V0A2	ETHE1	ZEB2
BAZ2B	ATP2A2	ATP6V0C	EXOSC3	ZNF385D
BBS4	ATP5E	ATP7A	FAM126A
BCKDK	ATP6AP2	ATP8	FASTKD2
BCL11A	ATP6V0A2	ATP8A2	FBXL4
BCL2	ATP7A	ATXN10	FGFR3
BDNF	ATP8A2	AUH	FGFRL1
BIRC6	ATR	AUTS2	FH
BRAF	ATRX	AVPR2	FKTN
BRCA2	AUH	B3GNT1	FLCN
BRD4	AUTS2	B4GAT1	GAA
BRINP1	AVPR2	BCAP31	GABRG2
BST1	B3GAT3	BCKDHA	GALE
BTAF1	B4GALNT1	BCKDK	GAMT
C12orf57	B4GALT7	BCL10	GATAD2B
C15orf62	BBS1	BDNF	GBE1
C3orf58	BBS10	BMP4	GCSH
C4B	BBS12	BMP5	GJC2
CA6	BBS2	BRAF	GLDC
CACNA1A	BBS4	BRAT1	GNAO1
CACNA1C	BBS5	BRCA2	GNB1
BICDL1	BBS7	BRD2	GNB5
ATP1A1	BBS9	BRWD3	GNE
BCAS1	BCAP31	BSCL2	GRIN2B
BIN1	BCKDHA	BSN	HCFC1
CACNA1B	BCKDHB	C12orf57	HDAC4
CACNA1D	BCKDK	C16orf62	HECW2
CACNA1E	BCOR	C18orf25	HEPACAM
CACNA1F	BCS1L	C19orf61	HERC2
CACNA1G	BLM	C2orf25	HNRNPH2
CACNA1H	BRAF	C3	HPRT1
CACNA1I	BRF1	C7orf55	HRAS
CACNA2D3	BRWD3	CACNA1A	HYMAI
CACNB2	BSCL2	CACNA1D	IARS
CADM1	BSND	CACNA1G	INPP5E
CADPS2	BTD	CACNA1H	INSR
CAMK2A	BUB1B	CACNA2D1	IPW
CAMK2B	C12orf57	CACNA2D2	KANSL1
CAMSAP2	C12orf65	CACNB4	KAT6B
CAMTA1	C2CD3	CACNG2	KBTBD13
CAPN12	CA8	CAD	KCNB1
CAPRIN1	CAMTA1	CALM2	KCNK9
CARD11	CANT1	CALN1	KCNT1
CASC4	CASC5	CAMTA1	KDM6A
CASK	CASK	CARD9	KIAA0556
CC2D1A	CBL	CARS2	KIAA0586
CCDC88C	CBS	CASK	KIF5A
CCDC91	CC2D2A	CASR	KIF7
CCT4	CCBE1	CAV3	KLHL40
CD276	CCDC88C	CBL	KLHL41
CD38	CD96	CC2D2A	KMT2D
CD44	CDH15	CCDC88A	LAMA2
CDC42BPB	CDK5RAP2	CCDC88C	LETM1
CDH10	CDK6	CCM1	LIAS
CDH11	CDKL5	CD46	LMBRD1
CDH8	CDON	CD59	LMOD3
CDH9	CDT1	CDK5	LOC108004531
CDK13	CENPJ	CDKL5	LOC108004532
CDKL5	CEP135	CELF4	LOC108281113
CDKN1B	CEP152	CELSR3	LOC108281114
CECR2	CEP290	CENPE	LOC108281115
CELF4	CERS1	CENPJ	LOC108449888
CELF6	CHAMP1	CENPW	LOC108449897
CEP135	CHD2	CEP164	LRP5
CEP290	CHD7	CEP290	MAGEL2
CEP41	CHD8	CERS1	MAN1B1
CGNL1	CHKB	CHD1L	MAOA
CHD1	CHMP1A	CHD2	MAOB
CHD2	CKAP2L	CHD3	MECP2
CHD5	CLCN4	CHD4	MED12
CHD7	CLCNKA	CHD8	MED13L
CHD8	CLCNKB	CHKB	MEF2C
CACNA2D1	CLIC2	CHL1	MIPEP
CASZ1	CLN3	CHN1	MKRN3
CBS	CLN5	CHRDL1	MKRN3-AS1
CCNG1	CLN6	CHRFAM7A	MKS1
CCNK	CLN8	CHRNA2	MLC1
CDH13	CLPB	CHRNA4	MLXIPL
CHD3	CNNM2	CHRNA7	MMACHC
CHKB	CNTNAP2	CHRNB2	MMADHC
CHMP1A	COA3	CHRNB3	MPV17
CHRM3	COG6	CLCN2	MPZ
CHRNA7	COG8	CLCN2a	MT-ATP6
CHRNB3	COL11A2	CLCN4	MTM1
CHST5	COL4A1	CLCN6	MTR
CIB2	COL4A2	CLIC2	MTRR
CIC	COL4A5	CLN3	MYH7
CLASP1	COLEC11	CLP1	NALCN
CLN8	COQ2	CLPB	NDN
CLSTN2	COX10	CLPP	NEB
CLSTN3	COX14	CLSTN1	NOTCH3
CLTCL1	COX15	CNNM2	NPAP1
CMIP	COX20	CNTN2	NPC1
CNGB3	COX6B1	CNTNAP2	NPC2
CNKSR2	COX8A	COG4	NPHP1
CNOT3	CPS1	COG6	NRXN1
CNR1	CRADD	COG7	NSD1
CNR2	CRBN	COG8	NSD2
CNTN4	CREBBP	COL18A1	OCRL
CNTN5	CSPP1	COL2A1	OFD1
CNTN6	CTCF	COL4A1	OGDH
CNTNAP2	CTDP1	COL4A2	OTUD6B
CNTNAP4	CTNNB1	COL4A3BP	PAX6
CNTNAP5	CTSA	COL6A2	PAXBP1
COL28A1	CTSD	COL6A3	PCCA
CPT2	CUL4B	COQ2	PCCB
CREBBP	CWF19L1	COQ4	PDE6D
CSMD1	CYP24A1	COQ6	PDSS1
CSNK1D	CYP27A1	COQ8A	PDSS2
CSNK1E	D2HGDH	COQ9	PET100
CTCF	DAG1	CORO1A	PEX1
CTNNA3	DARS2	COX1	PEX12
CTNNB1	DBT	COX3	PEX16
CTNND2	DCAF17	CP	PEX5
CTTNBP2	DCHS1	CPA6	PEX6
CUL3	DCX	CPS1	PIGA
CUL7	DDHD2	CPT2	PIGG
CUX1	DDX11	CRB2	PIGN
CNTN3	DDX3X	CREBBP	PIGT
CNTNAP3	DDX59	CRH	PIK3CA
CUX2	DEAF1	CRHR1	PLA2G6
CX3CR1	DHCR24	CRLF1	PLOD1
CXCR3	DHCR7	CSF1R	PLP1
CYFIP1	DHFR	CSNK1G1	PMM2
CYLC2	DHTKD1	CSPP1	POLG
CYP27A1	DKC1	CSTB	PPP2R5D
DAB1	DLAT	CTC1	PRDX1
DAGLA	DLD	CTH	PREPL
DAPK1	DLG3	CTNND2	PRF1
DAPP1	DMD	CUL4B	PRKAA1
DCTN5	DMPK	CUX1	PRPS1
DDX3X	DMXL2	CXCR4	PRUNE1
DDX53	DNA2	CYP26C1	PURA
DEAF1	DNAJC19	CYP27B1	PWAR1
DENR	DNM1	CYTB	PWRN1
DEPDC5	DNMT3B	D2HGDH	RAB18
CADM2	DOCK6	DARS2	RAB3GAP1
CADPS	DPAGT1	DCX	RAB3GAP2
CAMK4	DPM1	DEAF1	RERE
CBLN1	DPYD	DEPDC5	RPGRIP1L
CD99L2	DPYS	DGKD	RUSC2
CDH22	DYNC1H1	DHCR24	RYR1
CPEB4	DYRK1A	DHFR	SATB2
CRHR2	EBP	DHTKD1	SCN8A
CTNNA2	EDA	DIAPH1	SCO1
CYP11B1	EDC3	DIP2C	SDHA
DCUN1D1	EEF1A2	DKC1	SELENON
DCX	EFTUD2	DLD	SERAC1
DDC	EGF	DLG2	SHANK3
DDX11	EHMT1	DLG3	SIL1
DGKK	EIF2AK3	DMBX1	SLC12A5
DGKZ	ELOVL4	DMD	SLC16A2
DHCR7	EMD	DNAJC5	SLC25A3
DHX30	ENTPD1	DNAJC6	SLC2A10
DIAPH3	EP300	DNM1	SLC39A14
DIP2A	ERCC2	DNM3	SLC3A1
DIP2C	ERCC3	DNMT1	SLC52A2
DISC1	ERCC5	DNMT3A	SLC6A3
DIXDC1	ERCC6	DOCK6	SLC6A9
DLG1	ERCC8	DOCK7	SLC7A7
DLG4	ERLIN2	DOCK8	SLC9A6
DLGAP1	ESCO2	DOLK	SNORD115-1
DLGAP2	ETHE1	DPAGT1	SNORD116-1
DLX6	EXOSC3	DPM1	SNRPN
DMD	EYA1	DPM2	SPR
DMPK	EZH2	DPYD	SPTBN4
DMXL2	FA2H	DPYS	STIM1
DNAH10	FAM126A	DXS423E	STX11
DNAH17	FAM177A1	DYNC1H1	STXBP2
DNAH3	FAM20A	DYRK1A	SUCLA2
DNER	FAR1	EARS2	SUCLG1
DNM1L	FASTKD2	EBP	SUMF1
DNMT3A	FBN1	EEF1A2	SURF1
DOCK1	FBXO31	EFHC1	SYNE1
DOCK10	FGD1	EFTUD2	TACO1
DOCK4	FGF14	EGF	TAZ
DOCK8	FGFR1	EHMT1	TBC1D20
DPP10	FGFR2	EIF2C4	TBC1D24
DPP4	FGFR3	EIF3E	TBCK
DPP6	FH	ELMO1	TBL1XR1
DPYD	FKRP	EMX2	TCTN1
DPYSL2	FKTN	ENG	TCTN2
DPYSL3	FLNA	EPG5	TCTN3
DRD2	FLVCR1	EPHA5	TH
DRD3	FMN2	EPHB2	THAP11
DSCAM	FMR1	EPM2A	TK2
DST	FOLR1	ERBB4	TMEM138
DUSP15	FOXG1	ERCC6	TMEM216
DUSP22	FOXP1	ERMARD	TMEM231
DVL3	FOXP2	EXOC6B	TMEM237
DYDC1	FRAS1	EXOSC3	TMEM67
DYDC2	FREM2	EXT2	TMEM70
DYNC1H1	FTCD	F2	TNNT1
DYRK1A	FTO	FADD	TPM2
EBF3	FUCA1	FAM111A	TPM3
EEF1A2	GABRA1	FAR1	TRAPPC9
EFR3A	GAD1	FARP2	TTC21B
EHMT1	GALE	FARS2	TWNK
DLGAP3	GALT	FASN	UBA1
DLX1	GAMT	FAT4	UBE3A
DLX2	GATAD2B	FBXO28	UBE3B
DLX3	GATM	FGD1	UNC13D
DNAJC19	GCH1	FGF12	UNC80
DOLK	GCSH	FGF8	VPS11
DRD1	GDI1	FGFR2	VPS13B
DVL1	GFAP	FGFR3	VPS26C
EGR2	GJA1	FIG4	WAC
EIF3G	GJB1	FKTN	WHCR
EIF4E	GJC2	FLG	ZFP57
EIF4EBP2	GK	FLNA	ZNF143
ELAVL2	GLB1	FLT4	ZNF423
ELAVL3	GLDC	FMN2
ELP4	GLI2	FMR1
EML1	GLI3	FOLR1
EN2	GLUD1	FOXG1
EP300	GLYCTK	FOXRED1
EP400	GM2A	FRRS1L
EPC2	GMPPA	FSTL5
EMSY	GMPPB	FTL
EPHA6	GNAO1	FTO
EPHB2	GNAS	FTSJ1
EPHB6	GNB1	GABBR1
EPPK1	GNPAT	GABBR2
EPS8	GNPTAB	GABRA1
ERBB4	GNPTG	GABRA6
ERG	GNS	GABRB1
ERMN	GORAB	GABRB2
ESR1	GPC3	GABRB3
ESR2	GPC6	GABRD
ESRRB	GPI	GABRG2
ETFB	GPT2	GAL
EXOC6B	GRIA3	GALC
EXT1	GRIK2	GAS2L2
F13A1	GRIN1	GATA6
FABP3	GRIN2A	GATAD2B
FABP5	GRIN2B	GBE1
FABP7	GRIP1	GCH1
FAM19A2	GSS	GCK
FAM19A3	GTF2H5	GDI1
FAM47A	GUCY2D	GFAP
FAM92B	GUSB	GFM1
FAN1	HAL	GIPC1
FAT1	HAX1	GJD2
FBN1	HCCS	GK
FBXO33	HCFC1	GLDC
ERBIN	HCN1	GLI2
FBXO40	HDAC6	GLRA1
FCRL6	HDAC8	GLUL
FEZF2	HEPACAM	GLYCTK
FGA	HERC2	GMEB2
FGD1	HESX1	GMPPB
FGFBP3	HEXA	GNA11
FHIT	HGSNAT	GNAO1
FLT1	HLCS	GNAQ
FMR1	HMBS	GNB1
FOLH1	HMGB3	GNPAT
FOXG1	HOXA1	GOSR2
FOXP1	HPD	GPHN
FOXP2	HPRT1	GPR56
FRK	HRAS	GPR98
DLGAP4	HSD17B10	GPSM2
ELOVL2	HSPD1	GPT2
EXOC3	HUWE1	GPX4
EXOC5	IDS	GRIA3
EXOC6	IDUA	GRIK1
FAM135B	IER3IP1	GRIK2
FBXO11	IFIH1	GRIN1
FBXO15	IFT172	GRIN2 B
FER	IFT27	GRIN2A
FGFR2	IGF1	GRIN2B
FRMPD4	IKBKG	GRIN2D
GABBR2	IL1RAPL1	GRINA
GABRA1	INPP5E	GRIP1
GABRA3	IQSEC2	GTPBP3
GABRA4	IRX5	GUCY1A3
GABRA5	ISPD	GUF1
GABRB1	ITPR1	GYS1
GABRB3	JAG1	HADHA
GABRQ	JAM3	HAX1
GAD1	KANSL1	HCFC1
GADD45B	KAT6A	HCK
GALNT13	KAT6B	HCN1
GALNT14	KCNC3	HCN2
GAN	KCNH1	HCN4
GATM	KCNJ1	HDAC4
GDA	KCNJ10	HECW2
GGNBP2	KCNJ11	HEG1
GIGYF1	KCNJ6	HERC1
GIGYF2	KCNK9	HERC2
GLIS1	KCNQ2	HESX1
GLO1	KCNT1	HGSNAT
GLRA2	KCTD7	HIBCH
GNA14	KDM5C	HIP1
GNAS	KDM6A	HIVEP2
GNB1L	KIAA0196	HMGCS2
GPC4	KIAA1033	HNF1B
GPC6	KIAA2022	HNRNPH1
GPHN	KIF11	HNRNPU
GPR139	KIF1A	HOXD
GPR37	KIF1BP	HS2ST1
GPR85	KIF4A	HSD17B10
GRIA1	KIF5C	HSPG2
GRID1	KIF7	HTR1A
GRID2	KIRREL3	HTR2A
GRIK2	KMT2A	HTT
GRIK4	KMT2D	HUWE1
GRIK5	KPTN	IDH2
GRIN1	KRAS	IDS
GRIN2A	KYNU	IER3IP1
GRIN2B	L1CAM	IFIH1
GRIP1	L2HGDH	IFNAR2
GRM5	LAMA1	IGSF8
GRM7	LAMA2	IL10
GRM8	LAMC3	IL1B
GRPR	LAMP2	IL1RAPL1
GSK3B	LARGE	IL1RN
GUCY1A2	LARGE1	IL27RA
HCN1	LARP7	IL6
HDAC3	LBR	INO80
HDAC4	LHX3	INPP4A
HDC	LIG4	INSR
HDLBP	LINS1	IQSEC2
HECTD4	LRP2	IRF3
HECW2	LRP5	ISG15
HEPACAM	LRPPRC	ITGB1BP1
HERC2	LYST	ITPA
HIVEP3	MAF	JAM3
HNRNPH2	MAGEL2	JRK
HNRNPU	MAN1B1	KARS
HOMER1	MAN2B1	KAT6A
GABRG3	MANBA	KATNB1
GALNT8	MAOA	KCNA1
GAP43	MAP2K1	KCNA2
GAS2	MAP2K2	KCNAB1
GPD2	MASP1	KCNAB2
GPX1	MAT1A	KCNB1
GRID2IP	MBD5	KCNC1
GRIK3	MBTPS2	KCNC3
GRM1	MCCC1	KCND2
GRM4	MCCC2	KCND3
GSN	MCOLN1	KCNE1
GSTM1	MCPH1	KCNH1
GTF2I	MECP2	KCNH2
H2AFZ	MED12	KCNH5
HCFC1	MED13L	KCNJ11
HDAC6	MED17	KCNJ2
HLA-A	MED23	KCNJ5
HLA-B	MEF2C	KCNJ6
HLA-G	METTL23	KCNMA1
HMGN1	MGAT2	KCNMB3
HOXA1	MGP	KCNN3
HOXB1	MID1	KCNQ1
HRAS	MID2	KCNQ2
HS3ST5	MKKS	KCNQ3
HSD11B1	MKS1	KCNT1
HTR1B	MLC1	KCNV2
HTR2A	MLYCD	KCTD3
HTR3A	MMAA	KCTD7
HTR3C	MMACHC	KDM5C
HTR7	MMADHC	KDM6A
HUWE1	MOCS1	KIAA0442
HYDIN	MOGS	KIAA1456
ICA1	MPDU1	KIAA2022
IFNG	MPDZ	KIF11
IFNGR1	MPLKIP	KIF1A
IL17A	MTFMT	KIF2A
IL17RA	MTR	KIF3C
IL1R2	MTRR	KIF4A
IL1RAPL1	MUT	KIF5C
IL1RAPL2	MVK	KLF13
IL6	MYCN	KMT2A
ILF2	NAA10	KPNA7
IMMP2L	NAGA	KPTN
INPP1	NAGLU	KRAS
INTS6	NALCN	KRIT1
IQGAP3	NBN	L1CAM
IQSEC2	NDE1	LAMA2
IRF2BPL	NDP	LAMB1
ITGA4	NDST1	LAMC3
ITGB3	NDUFA1	LGI1
ITGB7	NDUFA10	LIAS
ITPR1	NDUFAF2	LMAN2L
JAKMIP1	NDUFS1	LMNB2
JARID2	NDUFS2	LOR
JMJD1C	NDUFS3	LPHN2
KANK1	NDUFS4	LRFN5
KAT2B	NDUFS7	LRP2
KAT6A	NDUFS8	LRPPRC
KATNAL1	NDUFV1	LRRK2
KATNAL2	NEU1	MAF
HDAC8	NF1	MAGEL2
HLA-DRB1	NFIA	MAGI2
IL16	NFIX	MAN1B1
INTS1	NHP2	MAN2A2
KCNB1	NHS	MANBA
KCNC1	NIN	MAOA
KCND2	NIPBL	MAPK10
KCND3	NKX2-1	MAPRE2
KCNJ10	NLGN4X	MAPT
KCNJ2	NOP10	MARCA2
KCNK7	NOTCH1	MATN4
KCNMA1	NPC1	MBD5
KCNQ2	NPC2	MBTPS2
KCNQ3	NR2F1	MCCC1
KCNT1	NRAS	MCCC2
KCTD13	NRXN1	MCM8
KDM4B	NSD1	MCM9
KDM5B	NSDHL	ME2
KDM5C	NSUN2	MECP2
KDM6A	NT5C2	MED12
KDM6B	NUP62	MED13L
KHDRBS2	OCLN	MED17
KIAA1586	OCRL	MED25
KIF13B	OFD1	MEF2C
KIF5C	OPHN1	METTL23
KIRREL3	ORC1	MFSD2A
KLC2	OTC	MID2
KLF16	PACS1	MKS1
KMT2A	PAFAH1B1	MLLT3
KMT2C	PAH	MLYCD
KMT2E	PAK3	MMAA
KPTN	PANK2	MMADHC
KRT26	PAX1	MOCS2
LAMA1	PAX2	MOGS
KMT5B	PAX3	MPDU1
LAMB1	PAX6	MPDZ
LAMC3	PAX8	MPP7
LEO1	PC	MRAP
LEP	PCDH19	MRI1
LILRB2	PCLO	MRPS22
LIN7B	PCNT	MSC
LRBA	PDE4D	MSX2
LRFN2	PDGFRA	MTFMT
LRFN5	PDHA1	MTHFR
LRP2	PDHX	MTMR11
LZTR1	PDP1	MTO1
MACROD2	PDSS1	MTOR
MAGEL2	PDSS2	MTR
MAOA	PEPD	MYH14
MAP2	PET100	MYH6
MAPK1	PEX1	MYO9B
MAPK3	PEX10	MYOCD
MARK1	PEX11B	MYT1L
KCNJ12	PEX12	NAA10
KCNJ15	PEX13	NADK2
KCNS3	PEX14	NANS
KDM4C	PEX16	NAPB
KHDRBS3	PEX19	NARS2
KIF14	PEX2	NAT8L
KIF21B	PEX26	NCKAP5
KIT	PEX3	ND1
KRR1	PEX5	ND4
LAT	PEX6	ND5
LMX1B	PEX7	NDE1
LPL	PGAP1	NDN
LRP2BP	PGAP2	NDP
LRPPRC	PGAP3	NDUFA2
LRRC1	PGK1	NDUFB11
LRRC4	PGM3	NEB
LRRC7	PHF6	NECAP1
LZTS2	PHF8	NEDD4
MAGED1	PHGDH	NEDD4L
MAL	PIEZO2	NELL1
MAOB	PIGL	NEU1
MAPK12	PIGN	NF1
MBD1	PIGO	NGFRAP1
MBD3	PIGT	NGLY1
MBD4	PIGV	NHLRC1
MBD5	PIGW	NHS
LNPK	PIK3CA	NID1
MAPK8IP2	PIK3R2	NIN
MBD6	PLA2G6	NIPA1
MBOAT7	PLCB1	NIPA2
MCM4	PLK4	NKAIN3
MCM6	PLP1	NLGN1
MCPH1	PMM2	NOD2
MDGA2	PNKP	NOL11
MECP2	PNP	NOL3
MED12	PNPLA6	NONO
MED13	POC1A	NOTCH1
MED13L	POGZ	NPC1
MEF2C	POLG	NPC1L1
MEGF10	POLR3A	NPRL2
MEGF11	POLR3B	NPRL3
MET	POMGNT1	NR2F1
MFRP	POMT1	NRAS
MIB1	POMT2	NRG2
MKL2	PORCN	NRG3
MNT	POU1F1	NRXN1
MOCOS	PPOX	NSD1
MPP6	PPP2R1A	NSDHL
MSANTD2	PPP2R5D	OCA2
MSN	PPT1	OCLN
MSNP1AS	PQBP1	OFD1
MSR1	PRKAR1A	OPA1
MTF1	PRODH	OPHN1
MTHFR	PRPS1	OPLAH
MTOR	PRSS12	OPRM1
MTR	PSAP	OR10H2
MTX2	PSMB8	ORAI1
MUC12	PSPH	OTC
MUC4	PTCH1	OTX2
MYH4	PTDSS1	PAFAH1B1
MYO16	PTEN	PAK3
MYO1A	PTPN11	PARK2
MYO1E	PTRH2	PARN
MYO5A	PTS	PC
MYO5C	PUF60	PCDH12
MYO9B	PURA	PCDH15
KMO	PUS1	PCDH19
MC4R	PYCR1	PCDH7
MCC	QDPR	PCDHB13
MEIS2	RAB18	PCDHB4
MYH10	RAB23	PCDHG
MYOZ1	RAB39B	PCLO
MYT1L	RAB3GAP1	PDE10A
NAA15	RAB3GAP2	PDHA1
NAALADL2	RAB40AL	PDHX
NACC1	RAD21	PDSS2
NAV2	RAD50	PDX1
NBEA	RAF1	PDYN
NCKAP1	RAI1	PEX13
NCKAP5	RARS2	PEX14
NCKAP5L	RBBP8	PEX19
NCOR1	RBM10	PEX2
NEFL	RBM28	PEX3
NEO1	RBPJ	PEX5
NF1	RECQL4	PEX7
MIR137	RFT1	PGAP1
NEXMIF	RIT1	PGAP2
NFIA	RLIM	PGAP3
NFIX	RNASEH2A	PGK1
NINL	RNASEH2B	PGM3
NIPA1	RNASEH2C	PHF6
NIPA2	RNASET2	PHF8
NIPBL	RNF113A	PHGDH
NLGN1	RNF125	PHOX2B
NLGN2	RNU4ATAC	PIGA
NLGN3	ROGDI	PIGG
NLGN4X	ROR2	PIGL
NOS1AP	RPE65	PIGN
NOS2	RPGRIP1L	PIGO
NR1D1	RPS6KA3	PIGQ
NR2F1	RRM2B	PIGT
NR3C2	RTEL1	PIGV
NR4A2	RTTN	PIGW
NRCAM	RUBCN	PIGY
NRP2	SACS	PIK3AP1
NRXN1	SALL1	PIK3R2
NRXN2	SAR1B	PLCB1
NRXN3	SARDH	PLEKHG2
NSD1	SASS6	PLP1
NTNG1	SATB2	PLXNB2
NTRK1	SBDS	PMP22
NTRK2	SCN1A	PNKP
NTRK3	SCN2A	PNPO
NUAK1	SCN8A	PNPT1
NUP133	SCO1	PODXL
NXPH1	SCO2	POGZ
OCRL	SDCCAG8	POLG2
ODF3L2	SDHA	POMC
OFD1	SEMA3E	POMGNT1
OPHN1	SEPSECS	POMK
OR1C1	SERAC1	POMT1
OR2T10	SERPINA1	POMT2
OR52M1	SETBP1	PPP1R15B
NSMCE3	SETD5	PPP1R3C
NDUFA5	SFXN4	PPP2R1A
NEGR1	SGSH	PPP2R5D
NELL1	SHANK3	PQBP1
NFE2L3	SHH	PRDM8
NFIB	SHOC2	PRICKLE1
NLGN4Y	SHROOM4	PRICKLE2
NOS1	SIL1	PRKDC
NOTCH2NL	SIM1	PRKX
NPAS2	SIX3	PRNP
NR1H2	SKI	PRODH
NRG1	SLC12A1	PROK2
NUDCD2	SLC12A6	PROS1
NXF5	SLC16A2	PRRC2B
OGT	SLC17A5	PRRT2
OPRM1	SLC1A1	PSAP
OR2M4	SLC25A15	PSAT1
OTUD7A	SLC25A22	PSEN1
OTX1	SLC26A4	PSEN2
OXT	SLC2A1	PSMB8
OXTR	SLC33A1	PSPH
P2RX4	SLC35A2	PTCH1
P2RX5	SLC35A3	PTEN
P4HA2	SLC35C1	PTH
PACS1	SLC46A1	PTPN23
PACS2	SLC6A17	PUF60
PAFAH1B1	SLC6A3	PURA
PAH	SLC6A8	PUS3
PARD3B	SLC7A7	QARS
PAX5	SLC9A6	QDPR
PAX6	SLC9A9	RAB18
PCCA	SMAD4	RAB39B
PCCB	SMARCA2	RAI1
PCDH10	SMARCA4	RANBP2
PCDH11X	SMARCB1	RANGAP1
PCDH15	SMARCE1	RAPGEF6
PCDH19	SMC1A	RAPSN
PCDH8	SMC3	RB1
PCDH9	SMOC1	RBFOX1
PCDHA1	SMPD1	RBFOX3
PCDHA10	SMS	RBM10
PCDHA11	SNAP29	RBP4
PCDHA12	SNIP1	RBPJ
PCDHA13	SNRPB	RD3
PCDHA2	SNX14	RELN
PCDHA3	SOBP	RFT1
PCDHA4	SOS1	RFX3
PCDHA5	SOX10	RMND1
PATJ	SOX11	RNF213
PAK2	SOX2	ROGDI
PAPOLG	SPAST	RORB
PBX1	SPATA5	RPL10
PCDHA6	SPECC1L	RTN4R
PCDHA7	SPG11	RTTN
PCDHA8	SPG20	RYR1
PCDHA9	SPR	RYR3
PCDHGA11	SPRED1	SASS6
PDCD1	SPTAN1	SATB2
PDE4B	SRCAP	SCA2
PDZD4	SRD5A3	SCARB2
PECR	SRPX2	SCN1 B
PER1	ST3GAL3	SCN1A
PER2	ST3GAL5	SCN1B
PGLYRP2	STAMBP	SCN2A
PHF2	STIL	SCN3A
PHF3	STRA6	SCN4A
PHIP	STT3A	SCN5A
PHRF1	STT3B	SCN8A
PIK3R2	STXBP1	SCN9A
PINX1	SUCLA2	SCN9Ab
PITX1	SUCLG1	SCNM1
PLCB1	SUMF1	SCO2
PLCD1	SUOX	SDHD
PLN	SYN1	SEC24D
PLXNA3	SYNE1	SEMA5B
PLXNA4	SYNGAP1	SEPSECS
PLXNB1	SYP	SERPINI1
PNPLA7	TACO1	SETBP1
POGZ	TAF2	SETD2
POLA2	TAT	SETD5
POMT1	TBC1D20	SEZ6
POT1	TBC1D24	SGCE
POU3F2	TBC1D7	SGK223
PPM1D	TBCE	SHANK1
PPP1R3F	TBL1XR1	SHANK3
PPP2R1B	TBX1	SHROOM4
PPP2R5D	TBX22	SIK1
PREX1	TCF4	SKI
PRICKLE1	TCN2	SLC12A5
PRICKLE2	TCTN3	SLC12A6
PRKCB	TECR	SLC13A5
PRKD1	TERT	SLC19A3
PRKDC	TFAP2A	SLC1A1
PRODH	TFAP2B	SLC1A2
PRPF39	TGFBR1	SLC1A3
PRR12	TGFBR2	SLC20A2
PRUNE2	TGIF1	SLC25A1
PSD3	THOC2	SLC25A12
PSMD10	THOC6	SLC25A15
PSMD12	THRB	SLC25A2
PRKN	TMCO1	SLC25A20
PTBP2	TMEM165	SLC25A22
PTCHD1	TMEM216	SLC26A1
PTEN	TMEM231	SLC2A1
PTGER3	TMEM237	SLC30A3
PTK7	TMEM240	SLC33A1
PTPN11	TMEM67	SLC35A2
PTPRB	TMLHE	SLC35A3
PYHIN1	TNNT2	SLC39A8
QRICH1	TPP1	SLC46A1
RAB11FIP5	TPTE	SLC4A10
RAB2A	TRAPPC11	SLC4A3
RAB39B	TRAPPC9	SLC6A1
PDE1C	TREX1	SLC6A3
PDE4A	TRIM37	SLC6A4
PDK2	TRMT10A	SLC6A8
PEX7	TSC1	SLC7A11
PHF21A	TSC2	SLC7A6OS
PHF8	TSEN54	SLC8A1
POMGNT1	TSHB	SLC9A1
PPFIA1	TSHR	SLC9A6
PPP2CA	TSPAN7	SLC9A9
PRKCA	TTC19	SLCO1B7
PRSS38	TTC8	SMARCA2
PTPRC	TTI2	SMARCA4
PTPRT	TUBA1A	SMARCB1
PXDN	TUBA8	SMARCE1
RAB19	TUBB2B	SMC1A
RAB43	TUBB3	SMS
RAC1	TUBB4A	SNAP25
RAD21L1	TUBGCP6	SNIP1
RAI1	TUSC3	SNRPN
RALA	TWIST1	SOBP
RALGAPB	TWNK	SON
RANBP17	UBE2A	SOX2
RAPGEF4	UBE3A	SOX5
RASSF5	UBE3B	SPATA5
RB1CC1	UBR1	SPTAN1
RBFOX1	UMPS	SPTLC2
RBM27	UPB1	SQSTM1
RBM8A	UPF3B	SRGAP2
RBMS3	UQCRQ	SRPX2
REEP3	UROC1	SSR4
RELN	USP9X	ST3GAL3
RERE	VLDLR	ST3GAL5
RFWD2	VPS13B	ST5
RFX3	VPS35	ST7
RGS7	VPS53	ST8SIA2
RHEB	VRK1	STAMBP
RIMS1	WDR45	STAT1
RIMS3	WDR62	STAT2
RLIM	WDR73	STK11
RNF135	WDR81	STRADA
RNF38	WFS1	STT3A
ROBO1	WNT5A	STT3B
ROBO2	WWOX	STX1 B
RORA	XPA	STX1B
RPL10	XPNPEP3	STXBP1
RPS6KA2	XYLT1	STYXL1
RPS6KA3	YAP1	SUCO
SAE1	ZBTB16	SV2A
SATB2	ZBTB18	SVIL
SBF1	ZBTB20	SYN1
SCFD2	ZBTB24	SYN2
SCN1A	ZC3H14	SYNGAP1
RP11-1407O15.2	ZC4H2	SYP
PCDHAC1	ZDHHC9	SYT2
PCDHAC2	ZEB2	SZT2
PHB	ZFYVE26	TAF1
PIK3CG	ZIC2	TAP1
PLAUR	ZMYND11	TBC1D24
PON1	ZNF711	TBCD
RNPS1	ZNF81	TBL1XR1
SAMD11	ZSWIM6	TCF4
SASH1		TDP1
SCN2A		TELO2
SCN4A		TENM2
SCN5A		THAP1
SCN7A		THOC2
SCN8A		THRB
PLPPR4		TICAM1
PPP1R1B		TK2
PTGS2		TMEM139
PVALB		TMLHE
RAD21		TNFAIP6
RASD1		TNK2
RHOXF1		TOR1A
RIT2		TRAF3
RPP25		TRAPPC11
SCN9A		TRAPPC9
SCP2		TRIM8
SDC2		TRMT10A
SEMA5A		TRMT44
SETBP1		TRNR1
SETD1B		TRPM1
SETD2		TRPM6
SETD5		TSC1
SETDB1		TSC2
SETDB2		TSEN15
SEZ6L2		TSEN2
SGSH		TSEN54
SGSM3		TSNARE1
SH3KBP1		TSPAN7
SHANK1		TSPYL4
SHANK2		TTN
SHANK3		TUBA1A
SHOX		TUBA3E
SIK1		TUBA8
SIN3A		TUBB2A
SLC12A5		TUBB2B
SLC16A3		TUBB3
SLC16A7		TUBB4A
SLC1A1		TUBG1
SLC1A2		TXN2
SLC22A9		UBA5
SLC25A24		UBE2A
SLC25A39		UBE3A
SLC27A4		UBR5
SLC29A4		UPB1
SLC30A5		USP9X
SLC38A10		VARS2
SLC45A1		VPS35
SLC4A10		VPS53
SLC6A1		WDR19
SLC6A3		WDR45
SLC6A4		WDR62
SDK1		WDR73
SET		WHSC1
SF3B1		WWOX
SLC24A2		XK
SLC35A3		XPNPEP3
SLC6A8		XPR1
SLC7A3		YAP1
SLC7A5		YWHAE
SLC7A7		ZBTB18
SLC9A6		ZC4H2
SLC9A9		ZDHHC15
SLCO1B3		ZEB2
SMAD4		ZFP57
SMARCA2		ZFYVE20
SMARCA4		ZMYND11
SMARCC2		ZMYND8
SMC1A		ZNF12
SMC3		ZNF182
SMG6		ZNF44
SNAP25		ZSWIM6
SND1
SNRPN
SNTG2
SNX14
SOX5
SPARCL1
SPAST
SPP2
SRCAP
SRGAP3
SRRM4
SRSF11
SSPO
SSRP1
ST7
STAG1
STAT1
STX1A
STXBP1
STXBP5
SUCLG2
SYAP1
SYN1
SYN2
SYN3
SYNE1
SYNGAP1
SYNJ1
TAF1
TAF1C
TAF1L
TAF6
TANC2
TAOK2
TBC1D23
TBC1D31
TBC1D5
TBL1XR1
SLC22A15
SLC25A12
SLC25A14
SLC25A27
SLC30A3
SLC33A1
SLC35B1
SLIT3
SLITRK5
SNX19
SNX5
SOD1
SPEN
SRD5A2
ST8SIA2
STK39
STYK1
SYNCRIP
SYT1
SYT17
SYT3
TBC1D7
TBL1X
TBR1
TBX1
TCF20
TCF4
SEMA3F
SERPINE1
SH3RF2
SLC22A3
SLC39A11
TCF7L2
TECTA
TERF2
TERT
TET2
TGM3
THBS1
TLK2
TM4SF19
TM4SF20
TMLHE
TNIP2
TNRC6B
TOP1
TOP3B
TERB2
TPH2
TRAPPC6B
TRAPPC9
TRIO
TRIP12
TRPC6
TRPM1
TSC1
TSC2
TSHZ3
TSPAN17
TSPAN7
TTI2
TTN
TUBGCP5
TYR
UBE3A
UBE3B
UBE3C
UBL7
UBN2
UBR5
UBR7
UNC13A
UNC79
UNC80
UPB1
UPF2
UPF3B
USH2A
USP15
TSPOAP1
TDO2
TH
THAP8
THRA
TMEM231
TNN
TOMM20
TPO
TRAF7
TRRAP
USP45
USP7
USP9Y
UTRN
VIL1
VIP
VPS13B
VSIG4
WAC
WASF1
WDFY3
TRIM33
TSN
TTC25
UBA6
UBE2H
UCN3
VASH1
VDR
VLDLR
VRK3
WDFY4
WDR26
WDR93
WNK3
WNT1
WNT2
WWOX
XIRP1
XPC
XPO1
YTHDC2
YWHAE
YY1
ZBTB16
ZBTB20
ZC3H4
ZMYND11
YEATS2
ZNF18
ZNF292
ZNF385B
ZNF407
ZNF462
ZNF517
ZNF548
ZNF559
ZNF626
ZNF713
ZNF774
ZNF8
ZNF804A
ZNF827
ZSWIM5
ZSWIM6
ZWILCH

## Sheet: Table S3
Table S3. List of genes in the 22q13.2-q13.33 region.
Gene
MAPK8IP2
TYMP
NCAPH2
TBC1D22A
PHF21B
PANX2
RP3-402G11.5
GTSE1
TTC38
GRAMD4
CELSR1
FBLN1
RABL2B
NUP50
NHP2L1
CCDC134
CENPM
CYP2D6
TCF20
POLDIP3
PPP6R2
SBF1
CYB5R3
LMF2
PACSIN2
TTLL1
CHKB
MCAT
ARSA
TSPO
TTLL12
PNPLA3
SAMM50
KIAA0930
SLC25A17
FAM118A
ST13
RBX1
EP300
L3MBTL2
CHADL
RANGAP1
ZC3H7B
PHF5A
ACO2
POLR3H
TRMU
PMM1
PPPDE2
CERK
BRD1
ZBED4
MLC1
HDAC10
TUBGCP6
A4GALT
MCHR1
RIBC2
SCO2
SULT4A1
ATXN10
KIAA1644
SCUBE1
TNFRSF13C
TEF
TRABD
SERHL
CSDC2
DNAJB7
FAM109B
ODF3B
RRP7B
ALG12
C22orf32
SERHL2
TOB2
RP5-821D11.7
CRELD2
C22orf46
AC002055.4
NDUFA6
MAPK11
PRR5
MPPED1
PPARA
EFCAB6
WNT7B
MAPK12
LDOC1L
PARVB
RRP7A
XPNPEP3
XRCC6
PLXNB2
MKL1
MIR4763
PIM3
SREBF2
NAGA
CTA-384D8.20
CPT1B
FAM116B
C22orf40
CYP2D7P1
CTA-250D10.15
MIRLET7B
RP1-257I20.13
SLC25A5P1
SYCE3
FAM19A5
MIR1281
MIR1249
RP4-796I17.5
CTA-250D10.19
CTA-217C2.1
RP4-669P10.19
XX-C283C717.1
Z83851.1
AL022476.2
RP5-996D20.3
RP11-398F12.1
RP4-669P10.16
RP1-85F18.6
AL049757.3
Z82214.2
SHISA8
RP6-109B7.4
RP4-756G23.5
NFAM1
RP4-669P10.18
ARHGAP8
RP6-109B7.3
ARFGAP3
PRR5-ARHGAP8
ATP5L2
SHANK3
CHKB-CPT1B
Z83840.1
CITF22-92A6.1

## Sheet: Table S4
Table S4. Combined list of genes for the co-expression network analysis.
Ensembl	Gene_id	Gene	Entrez	ASD	ID	Seizures	Hypotonia	LangImp	X22q13
ENSG00000000419	8736	DPM1	8813	0	1	1	0	0	0
ENSG00000001617	6369	SEMA3F	6405	1	0	0	0	0	0
ENSG00000001631	884	KRIT1	889	0	0	1	0	0	0
ENSG00000003147	3362	ICA1	3382	1	0	0	0	0	0
ENSG00000004468	947	CD38	952	1	0	0	0	0	0
ENSG00000004777	77694	ARHGAP33	115703	1	0	0	0	0	0
ENSG00000004848	81766	ARX	170302	1	1	1	0	0	0
ENSG00000004866	7936	ST7	7982	1	0	1	0	0	0
ENSG00000004961	3035	HCCS	3052	0	1	0	0	0	0
ENSG00000005339	1378	CREBBP	1387	1	1	1	0	0	0
ENSG00000005381	4327	MPO	4353	0	0	0	0	1	0
ENSG00000005882	5132	PDK2	5164	1	0	0	0	0	0
ENSG00000005893	3895	LAMP2	3920	0	1	0	0	0	0
ENSG00000005955	55696	GGNBP2	79893	1	0	0	0	0	0
ENSG00000006016	9118	CRLF1	9244	0	0	1	0	0	0
ENSG00000006071	6793	ABCC8	6833	0	1	1	0	0	0
ENSG00000006283	8834	CACNA1G	8913	1	0	1	0	0	0
ENSG00000006377	1738	DLX6	1750	1	0	0	0	0	0
ENSG00000006451	5866	RALA	5898	1	0	0	0	0	0
ENSG00000006530	35039	AGK	55750	0	1	0	0	0	0
ENSG00000006607	9711	FARP2	9855	0	0	1	0	0	0
ENSG00000006695	1343	COX10	1352	0	1	0	1	0	0
ENSG00000007168	5016	PAFAH1B1	5048	1	1	1	0	0	0
ENSG00000007171	4812	NOS2	4843	1	0	0	0	0	0
ENSG00000007372	5048	PAX6	5080	1	1	0	1	0	0
ENSG00000007402	9127	CACNA2D2	9254	0	0	1	0	0	0
ENSG00000007541	8968	PIGQ	9091	0	0	1	0	0	0
ENSG00000008056	6813	SYN1	6853	1	1	1	0	0	0
ENSG00000008083	3695	JARID2	3720	1	0	0	0	0	0
ENSG00000008086	6752	CDKL5	6792	1	1	1	1	0	0
ENSG00000008277	32934	ADAM22	53616	0	0	1	0	0	0
ENSG00000008300	1938	CELSR3	1951	0	0	1	0	0	0
ENSG00000008311	10012	AASS	10157	0	1	1	0	0	0
ENSG00000008441	4758	NFIX	4784	1	1	0	0	0	0
ENSG00000008735	23296	MAPK8IP2	23542	1	0	0	0	0	1
ENSG00000009335	9546	UBE3C	9690	1	0	0	0	0	0
ENSG00000009830	29687	POMT2	29954	0	1	1	0	0	0
ENSG00000009950	30567	MLXIPL	51085	0	0	0	1	0	0
ENSG00000010404	3403	IDS	3423	0	1	1	0	0	0
ENSG00000010704	3059	HFE	3077	0	0	0	0	1	0
ENSG00000010818	3079	HIVEP2	3097	0	0	1	0	0	0
ENSG00000011021	1176	CLCN6	1185	0	0	1	0	0	0
ENSG00000011143	34192	MKS1	54903	0	1	1	1	0	0
ENSG00000011198	30581	ABHD5	51099	0	1	0	0	0	0
ENSG00000011295	34191	TTC19	54902	0	1	0	0	0	0
ENSG00000011422	5297	PLAUR	5329	1	0	0	0	0	0
ENSG00000011677	2540	GABRA3	2556	1	0	0	0	0	0
ENSG00000012174	30841	MBTPS2	51360	0	1	1	0	0	0
ENSG00000012963	34437	UBR7	55148	1	0	0	0	0	0
ENSG00000013306	31109	SLC25A39	51629	1	0	0	0	0	0
ENSG00000013375	5206	PGM3	5238	0	1	1	0	0	0
ENSG00000013503	34992	POLR3B	55703	0	1	0	0	0	0
ENSG00000013573	1651	DDX11	1663	1	1	0	0	0	0
ENSG00000014138	23402	POLA2	23649	1	0	0	0	0	0
ENSG00000014914	10745	MTMR11	10903	0	0	1	0	0	0
ENSG00000014919	1346	COX15	1355	0	1	0	1	0	0
ENSG00000015133	133396	CCDC88C	440193	1	1	1	0	0	0
ENSG00000015171	10613	ZMYND11	10771	1	1	1	0	0	0
ENSG00000017427	3459	IGF1	3479	0	1	0	0	0	0
ENSG00000018510	8474	AGPS	8540	0	0	1	0	0	0
ENSG00000018625	474	ATP1A2	477	0	1	1	0	0	0
ENSG00000021574	6643	SPAST	6683	1	1	0	0	0	0
ENSG00000021645	9234	NRXN3	9369	1	0	0	0	0	0
ENSG00000021826	1364	CPS1	1373	0	1	1	0	0	0
ENSG00000022355	2538	GABRA1	2554	1	1	1	0	0	0
ENSG00000023228	4693	NDUFS1	4719	0	1	0	0	0	0
ENSG00000023287	9677	RB1CC1	9821	1	0	0	0	0	0
ENSG00000025708	1878	TYMP	1890	0	0	0	0	0	1
ENSG00000025770	29516	NCAPH2	29781	0	0	0	0	0	1
ENSG00000026297	8566	RNASET2	8635	0	1	0	0	0	0
ENSG00000026508	955	CD44	960	1	0	0	0	0	0
ENSG00000027001	4260	MIPEP	4285	0	0	0	1	0	0
ENSG00000027697	3439	IFNGR1	3459	1	0	0	0	0	0
ENSG00000027847	11124	B4GALT7	11285	0	1	0	0	0	0
ENSG00000029993	3129	HMGB3	3149	0	1	0	0	0	0
ENSG00000030582	2879	GRN	2896	0	0	0	0	1	0
ENSG00000031081	36787	ARHGAP31	57514	0	1	0	0	0	0
ENSG00000032444	10750	PNPLA6	10908	0	1	0	0	0	0
ENSG00000033011	35337	ALG1	56052	0	1	1	0	0	0
ENSG00000033122	36827	LRRC7	57554	1	0	0	0	0	0
ENSG00000033178	34525	UBA6	55236	1	0	0	0	0	0
ENSG00000034053	318	APBA2	321	1	0	0	0	0	0
ENSG00000034693	8438	PEX3	8504	0	1	1	0	0	0
ENSG00000036054	35062	TBC1D23	55773	1	0	0	0	0	0
ENSG00000036257	8391	CUL3	8452	1	0	0	0	0	0
ENSG00000037280	2308	FLT4	2324	0	0	1	0	0	0
ENSG00000037474	34177	NSUN2	54888	0	1	0	0	0	0
ENSG00000037757	58455	MRI1	84245	0	0	1	0	0	0
ENSG00000038002	172	AGA	175	0	1	0	0	0	0
ENSG00000038382	7161	TRIO	7204	1	0	0	0	0	0
ENSG00000039650	11123	PNKP	11284	0	1	1	0	0	0
ENSG00000040608	41602	RTN4R	65078	0	0	1	0	0	0
ENSG00000040731	1003	CDH10	1008	1	0	0	0	0	0
ENSG00000040933	3606	INPP4A	3631	0	0	1	0	0	0
ENSG00000041515	22781	MYO16	23026	1	0	0	0	0	0
ENSG00000042088	35064	TDP1	55775	0	0	1	0	0	0
ENSG00000042429	9303	MED17	9440	0	1	1	0	0	0
ENSG00000043093	33458	DCUN1D1	54165	1	0	0	0	0	0
ENSG00000043355	7503	ZIC2	7546	0	1	0	0	0	0
ENSG00000044090	9676	CUL7	9820	1	0	0	0	0	0
ENSG00000046651	8416	OFD1	8481	1	1	1	1	0	0
ENSG00000047188	41411	YTHDC2	64848	1	0	0	0	0	0
ENSG00000047457	1347	CP	1356	0	0	1	0	0	0
ENSG00000047578	23002	KIAA0556	23247	0	0	0	1	0	0
ENSG00000047579	58273	DTNBP1	84062	0	0	0	0	1	0
ENSG00000047597	7461	XK	7504	0	0	1	0	0	0
ENSG00000048140	26010	TSPAN17	26262	1	0	0	0	0	0
ENSG00000048342	36818	CC2D2A	57545	0	1	1	1	0	0
ENSG00000048392	29974	RRM2B	50484	0	1	0	0	0	0
ENSG00000049167	1152	ERCC8	1161	0	1	0	0	0	0
ENSG00000049540	1991	ELN	2006	0	0	0	1	0	0
ENSG00000049618	36765	ARID1B	57492	1	1	1	1	0	0
ENSG00000049759	23082	NEDD4L	23327	0	0	1	0	0	0
ENSG00000049769	59739	PPP1R3F	89801	1	0	0	0	0	0
ENSG00000050030	109873	KIAA2022	340533	0	0	1	0	0	0
ENSG00000050344	9459	NFE2L3	9603	1	0	0	0	0	0
ENSG00000050555	10173	LAMC3	10319	1	1	1	0	0	0
ENSG00000050628	5701	PTGER3	5733	1	0	0	0	0	0
ENSG00000052850	37989	ALX4	60529	0	1	0	0	0	0
ENSG00000053918	3759	KCNQ1	3784	0	0	1	0	0	0
ENSG00000054282	10648	SDCCAG8	10806	0	1	0	0	0	0
ENSG00000054611	25522	TBC1D22A	25771	0	0	0	0	0	1
ENSG00000054983	2565	GALC	2581	0	0	1	0	0	0
ENSG00000055118	3732	KCNH2	3757	0	0	1	0	0	0
ENSG00000056487	76622	PHF21B	112885	0	0	0	0	0	1
ENSG00000058404	812	CAMK2B	816	1	0	0	0	0	0
ENSG00000059573	5800	ALDH18A1	5832	0	1	1	0	0	0
ENSG00000060069	9027	CTDP1	9150	0	1	0	0	0	0
ENSG00000060140	34648	STYK1	55359	1	0	0	0	0	0
ENSG00000060642	34939	PIGV	55650	0	1	1	0	0	0
ENSG00000061676	10629	NCKAP1	10787	1	0	0	0	0	0
ENSG00000061938	10042	TNK2	10188	0	0	1	0	0	0
ENSG00000063015	79037	SEZ6	124925	0	0	1	0	0	0
ENSG00000064270	9770	ATP2C2	9914	0	0	0	0	1	0
ENSG00000064309	30420	CDON	50937	0	1	0	0	0	0
ENSG00000064313	6833	TAF2	6873	0	1	0	0	0	0
ENSG00000064601	5444	CTSA	5476	0	1	0	0	0	0
ENSG00000064687	10200	ABCA7	10347	1	0	0	0	0	0
ENSG00000064787	8471	BCAS1	8537	1	0	0	0	0	0
ENSG00000065000	8864	AP3D1	8943	0	0	1	0	0	0
ENSG00000065427	3710	KARS	3735	0	0	1	0	0	0
ENSG00000065526	22768	SPEN	23013	1	0	0	0	0	0
ENSG00000065883	8552	CDK13	8621	1	0	0	0	0	0
ENSG00000065989	5109	PDE4A	5141	1	0	0	0	0	0
ENSG00000066032	1485	CTNNA2	1496	1	0	0	0	0	0
ENSG00000066279	92030	ASPM	259266	1	1	1	0	0	0
ENSG00000066468	2248	FGFR2	2263	1	1	1	0	0	0
ENSG00000066629	1994	EML1	2009	1	0	0	0	0	0
ENSG00000067141	4730	NEO1	4756	1	0	0	0	0	0
ENSG00000067715	6817	SYT1	6857	1	0	0	0	0	0
ENSG00000067836	55444	ROGDI	79641	0	1	1	0	0	0
ENSG00000067840	36868	PDZD4	57595	1	0	0	0	0	0
ENSG00000067842	489	ATP2B3	492	0	0	0	1	0	0
ENSG00000068024	9615	HDAC4	9759	1	0	1	1	0	0
ENSG00000068078	2246	FGFR3	2261	0	1	1	1	0	0
ENSG00000068366	2167	ACSL4	2182	0	1	0	0	0	0
ENSG00000068438	23891	FTSJ1	24140	0	0	1	0	0	0
ENSG00000068793	22946	CYFIP1	23191	1	0	0	0	0	0
ENSG00000068796	3771	KIF2A	3796	0	0	1	0	0	0
ENSG00000069248	35035	NUP133	55746	1	0	0	0	0	0
ENSG00000069329	35026	VPS35	55737	0	1	1	0	0	0
ENSG00000069424	8448	KCNAB2	8514	0	0	1	0	0	0
ENSG00000069431	9915	ABCC9	10060	0	1	0	0	0	0
ENSG00000069482	30565	GAL	51083	0	0	1	0	0	0
ENSG00000069535	4104	MAOB	4129	1	0	0	1	0	0
ENSG00000069667	6063	RORA	6095	1	0	0	0	0	0
ENSG00000069869	4708	NEDD4	4734	0	0	1	0	0	0
ENSG00000069966	10534	GNB5	10681	0	0	0	1	1	0
ENSG00000070047	36934	PHRF1	57661	1	0	0	0	0	0
ENSG00000070366	23048	SMG6	23293	1	0	0	0	0	0
ENSG00000070367	10493	EXOC5	10640	1	0	0	0	0	0
ENSG00000070371	8167	CLTCL1	8218	1	0	0	0	0	0
ENSG00000070444	4309	MNT	4335	1	0	0	0	0	0
ENSG00000070614	3320	NDST1	3340	0	1	0	0	0	0
ENSG00000070669	437	ASNS	440	0	1	1	1	0	0
ENSG00000070808	811	CAMK2A	815	1	0	0	0	0	0
ENSG00000071242	6163	RPS6KA2	6196	1	0	0	0	0	0
ENSG00000071246	22602	VASH1	22846	1	0	0	0	0	0
ENSG00000071553	534	ATP6AP1	537	0	0	1	0	0	0
ENSG00000071655	32933	MBD3	53615	1	0	0	0	0	0
ENSG00000072121	23258	ZFYVE26	23503	0	1	0	0	0	0
ENSG00000072210	221	ALDH3A2	224	0	1	0	0	0	0
ENSG00000072364	26870	AFF4	27125	1	1	0	0	0	0
ENSG00000072501	8191	SMC1A	8243	1	1	1	0	0	0
ENSG00000072506	3011	HSD17B10	3028	0	1	1	0	0	0
ENSG00000072682	8874	P4HA2	8974	1	0	0	0	0	0
ENSG00000072778	34	ACADVL	37	0	0	0	1	0	0
ENSG00000072864	34109	NDE1	54820	0	1	1	0	0	0
ENSG00000073150	35945	PANX2	56666	0	0	0	0	0	1
ENSG00000073169	57884	RP3-402G11.5	83642	0	0	0	0	0	1
ENSG00000073464	1174	CLCN4	1183	0	1	1	0	0	0
ENSG00000073578	6353	SDHA	6389	0	1	0	1	0	0
ENSG00000073584	6565	SMARCE1	6605	0	1	1	0	0	0
ENSG00000073756	5711	PTGS2	5743	1	0	0	0	0	0
ENSG00000074047	2719	GLI2	2736	0	1	1	0	0	0
ENSG00000074054	23087	CLASP1	23332	1	0	0	0	0	0
ENSG00000074181	4823	NOTCH3	4854	0	0	0	1	0	0
ENSG00000074582	614	BCS1L	617	0	1	0	1	0	0
ENSG00000074590	9747	NUAK1	9891	1	0	0	0	0	0
ENSG00000075043	3760	KCNQ2	3785	1	1	1	0	0	0
ENSG00000075218	30992	GTSE1	51512	0	0	0	0	0	1
ENSG00000075234	34309	TTC38	55020	0	0	0	0	0	1
ENSG00000075239	35	ACAT1	38	0	1	0	0	0	0
ENSG00000075240	22906	GRAMD4	23151	0	0	0	0	0	1
ENSG00000075275	9476	CELSR1	9620	0	0	0	0	0	1
ENSG00000075415	5218	SLC25A3	5250	0	0	0	1	0	0
ENSG00000075624	57	ACTB	60	0	1	1	0	0	0
ENSG00000075702	94292	WDR62	284403	0	1	1	0	0	0
ENSG00000075711	1727	DLG1	1739	1	0	0	0	0	0
ENSG00000076003	4150	MCM6	4175	1	0	0	0	0	0
ENSG00000076201	25679	PTPN23	25930	0	0	1	0	0	0
ENSG00000076351	76652	SLC46A1	113235	0	1	1	0	0	0
ENSG00000076685	22733	NT5C2	22978	0	1	0	0	0	0
ENSG00000076716	2224	GPC4	2239	1	0	0	0	0	0
ENSG00000076944	6773	STXBP2	6813	0	0	0	1	0	0
ENSG00000077044	8461	DGKD	8527	0	0	1	0	0	0
ENSG00000077063	58208	CTTNBP2	83992	1	0	0	0	0	0
ENSG00000077264	5031	PAK3	5063	0	1	1	0	0	0
ENSG00000077279	1629	DCX	1641	1	1	1	0	1	0
ENSG00000077549	828	CAPZB	832	0	0	0	1	0	0
ENSG00000077721	7276	UBE2A	7319	0	1	1	0	0	0
ENSG00000077782	2245	FGFR1	2260	0	1	0	0	0	0
ENSG00000077809	2952	GTF2I	2969	1	0	0	0	0	0
ENSG00000077942	2177	FBLN1	2192	0	0	0	0	0	1
ENSG00000078018	4108	MAP2	4133	1	0	0	0	0	0
ENSG00000078070	36201	MCCC1	56922	0	1	1	0	0	0
ENSG00000078328	34004	RBFOX1	54715	1	0	1	0	0	0
ENSG00000078369	2765	GNB1	2782	0	1	1	1	0	0
ENSG00000079215	6471	SLC1A3	6507	0	0	1	0	0	0
ENSG00000079432	22907	CIC	23152	1	0	0	0	0	0
ENSG00000079482	4951	OPHN1	4983	1	1	1	0	0	0
ENSG00000079841	22754	RIMS1	22999	1	0	0	0	0	0
ENSG00000079974	10999	RABL2B	11158	0	0	0	0	0	1
ENSG00000080224	94508	EPHA6	285220	1	0	0	0	0	0
ENSG00000080298	5959	RFX3	5991	1	0	1	0	0	0
ENSG00000080503	6556	SMARCA2	6595	1	1	1	0	0	0
ENSG00000080561	10885	MID2	11043	0	1	1	0	0	0
ENSG00000080603	10689	SRCAP	10847	1	1	0	0	1	0
ENSG00000080815	5631	PSEN1	5663	0	0	1	0	1	0
ENSG00000080845	22595	DLGAP4	22839	1	0	0	0	0	0
ENSG00000081014	23186	AP4E1	23431	0	0	0	1	0	0
ENSG00000081189	4183	MEF2C	4208	1	1	1	1	0	0
ENSG00000081237	5756	PTPRC	5788	1	0	0	0	0	0
ENSG00000081307	55679	UBA5	79876	0	0	1	0	0	0
ENSG00000081479	4011	LRP2	4036	1	1	1	0	0	0
ENSG00000081803	60316	CADPS2	93664	1	0	0	0	0	0
ENSG00000081818	35414	PCDHB4	56131	0	0	1	0	0	0
ENSG00000081842	35425	PCDHA6	56142	1	0	0	0	0	0
ENSG00000082212	4175	ME2	4200	0	0	1	0	0	0
ENSG00000082458	1729	DLG3	1741	0	1	1	0	0	0
ENSG00000082684	33728	SEMA5B	54437	0	0	1	0	0	0
ENSG00000082701	2915	GSK3B	2932	1	0	0	0	0	0
ENSG00000082898	7471	XPO1	7514	1	0	0	0	0	0
ENSG00000083123	591	BCKDHB	594	0	1	0	0	0	0
ENSG00000083168	7947	KAT6A	7994	1	1	1	0	0	0
ENSG00000083444	5319	PLOD1	5351	0	0	0	1	0	0
ENSG00000083454	4994	P2RX5	5026	1	0	0	0	0	0
ENSG00000083842	7511	ZNF8	7554	1	0	0	0	0	0
ENSG00000083857	2180	FAT1	2195	1	0	0	0	0	0
ENSG00000084731	3772	KIF3C	3797	0	0	1	0	0	0
ENSG00000084754	3013	HADHA	3030	0	0	1	0	0	0
ENSG00000084774	786	CAD	790	0	0	1	0	0	0
ENSG00000085063	961	CD59	966	0	0	1	0	0	0
ENSG00000085224	543	ATRX	546	1	1	0	1	0	0
ENSG00000085491	29690	SLC25A24	29957	1	0	0	0	0	0
ENSG00000085788	23014	DDHD2	23259	0	1	0	0	0	0
ENSG00000085840	4966	ORC1	4998	0	1	0	0	0	0
ENSG00000085998	34913	POMGNT1	55624	1	1	1	0	0	0
ENSG00000086205	2330	FOLH1	2346	1	0	0	0	0	0
ENSG00000086758	9930	HUWE1	10075	1	1	1	0	0	0
ENSG00000086848	55599	ALG9	79796	0	0	1	0	0	0
ENSG00000087085	40	ACHE	43	1	0	0	0	0	0
ENSG00000087086	2496	FTL	2512	0	0	1	0	0	0
ENSG00000087258	2758	GNAO1	2775	0	1	1	1	0	0
ENSG00000087299	55746	L2HGDH	79944	0	1	0	0	0	0
ENSG00000087460	2761	GNAS	2778	1	1	0	0	0	0
ENSG00000087470	9914	DNM1L	10059	1	0	0	0	0	0
ENSG00000088035	29662	ALG6	29929	1	1	1	0	0	0
ENSG00000088038	4818	CNOT3	4849	1	0	0	0	0	0
ENSG00000088256	2750	GNA11	2767	0	0	1	0	0	0
ENSG00000088305	1777	DNMT3B	1789	0	1	0	0	0	0
ENSG00000088538	1783	DOCK3	1795	0	0	0	1	0	0
ENSG00000088682	36295	COQ9	57017	0	0	1	1	0	0
ENSG00000089006	26876	SNX5	27131	1	0	0	0	0	0
ENSG00000089250	4811	NOS1	4842	1	0	0	0	0	0
ENSG00000089818	25726	NECAP1	25977	0	0	1	0	0	0
ENSG00000090020	6512	SLC9A1	6548	0	0	1	0	0	0
ENSG00000090061	8735	CCNK	8812	1	0	0	0	0	0
ENSG00000090581	58773	GNPTG	84572	0	1	0	0	0	0
ENSG00000090674	36468	MCOLN1	57192	0	1	0	0	0	0
ENSG00000090861	13	AARS	16	0	0	1	0	0	0
ENSG00000090889	23888	KIF4A	24137	0	1	1	0	0	0
ENSG00000090924	41420	PLEKHG2	64857	0	0	1	0	0	0
ENSG00000091009	33730	RBM27	54439	1	0	0	0	0	0
ENSG00000091129	4866	NRCAM	4897	1	0	0	0	0	0
ENSG00000091136	3887	LAMB1	3912	1	0	1	0	0	0
ENSG00000091137	5140	SLC26A4	5172	0	1	0	0	0	0
ENSG00000091140	1726	DLD	1738	0	1	1	0	0	0
ENSG00000091428	10911	RAPGEF4	11069	1	0	0	0	0	0
ENSG00000091483	2256	FH	2271	0	1	0	1	0	0
ENSG00000092054	4599	MYH7	4625	0	0	0	1	0	0
ENSG00000092621	25976	PHGDH	26227	0	1	1	0	0	0
ENSG00000092929	83636	UNC13D	201294	0	0	0	1	0	0
ENSG00000092964	1796	DPYSL2	1808	1	0	0	0	0	0
ENSG00000093000	10604	NUP50	10762	0	0	0	0	0	1
ENSG00000093010	1303	COMT	1312	0	0	0	0	1	0
ENSG00000094631	9869	HDAC6	10013	1	1	0	0	0	0
ENSG00000094914	8035	AAAS	8086	0	1	1	0	0	0
ENSG00000095380	33479	NANS	54187	0	0	1	0	0	0
ENSG00000095485	34569	CWF19L1	55280	0	1	0	0	0	0
ENSG00000095564	8924	BTAF1	9044	1	0	0	0	0	0
ENSG00000095787	30803	WAC	51322	1	0	0	1	0	0
ENSG00000096093	77179	EFHC1	114327	0	0	1	0	0	0
ENSG00000097007	22	ABL1	25	0	0	0	1	0	0
ENSG00000097021	11167	ACOT7	11332	0	0	1	0	0	0
ENSG00000099246	22687	RAB18	22931	0	1	1	1	0	0
ENSG00000099331	4624	MYO9B	4650	1	0	1	0	0	0
ENSG00000099365	76608	STX1B	112755	0	0	1	0	0	0
ENSG00000099797	9383	TECR	9524	0	1	0	0	0	0
ENSG00000099822	607	HCN2	610	0	0	1	0	0	0
ENSG00000099860	4590	GADD45B	4616	1	0	0	0	0	0
ENSG00000099940	9207	SNAP29	9342	0	1	0	0	0	0
ENSG00000099949	8165	LZTR1	8216	1	0	0	0	0	0
ENSG00000099954	27187	CECR2	27443	1	0	0	0	0	0
ENSG00000099956	6559	SMARCB1	6598	0	1	1	0	0	0
ENSG00000100014	23139	SPECC1L	23384	0	1	0	0	0	0
ENSG00000100030	5562	MAPK1	5594	1	0	0	0	0	0
ENSG00000100033	5593	PRODH	5625	1	1	1	0	0	0
ENSG00000100038	8861	TOP3B	8940	1	0	0	0	0	0
ENSG00000100075	6540	SLC25A1	6576	0	0	1	0	0	0
ENSG00000100138	4778	NHP2L1	4809	0	0	0	0	0	1
ENSG00000100146	6623	SOX10	6663	0	1	0	0	0	0
ENSG00000100147	55682	CCDC134	79879	0	0	0	0	0	1
ENSG00000100150	9537	DEPDC5	9681	1	0	1	0	0	0
ENSG00000100162	54859	CENPM	79019	0	0	0	0	0	1
ENSG00000100197	1553	CYP2D6	1565	0	0	0	0	0	1
ENSG00000100207	6902	TCF20	6942	1	0	0	0	0	1
ENSG00000100227	58481	POLDIP3	84271	0	0	0	0	0	1
ENSG00000100239	9557	PPP6R2	9701	0	0	0	0	0	1
ENSG00000100241	6271	SBF1	6305	1	0	0	0	0	1
ENSG00000100243	1715	CYB5R3	1727	0	0	0	0	0	1
ENSG00000100258	60024	LMF2	91289	0	0	0	0	0	1
ENSG00000100266	11091	PACSIN2	11252	0	0	0	0	0	1
ENSG00000100271	25558	TTLL1	25809	0	0	0	0	0	1
ENSG00000100288	1112	CHKB	1120	1	1	1	0	0	1
ENSG00000100294	27094	MCAT	27349	0	0	0	0	0	1
ENSG00000100299	407	ARSA	410	0	1	0	1	0	1
ENSG00000100300	702	TSPO	706	0	0	0	0	0	1
ENSG00000100304	22925	TTLL12	23170	0	0	0	0	0	1
ENSG00000100344	56140	PNPLA3	80339	0	0	0	0	0	1
ENSG00000100346	8832	CACNA1I	8911	1	0	0	0	0	0
ENSG00000100347	25562	SAMM50	25813	0	0	0	0	0	1
ENSG00000100348	25577	TXN2	25828	0	0	1	0	0	0
ENSG00000100354	22867	TNRC6B	23112	1	0	0	0	0	0
ENSG00000100359	27097	SGSM3	27352	1	0	0	0	0	0
ENSG00000100360	10862	IFT27	11020	0	1	0	0	0	0
ENSG00000100362	5784	PVALB	5816	1	0	0	0	0	0
ENSG00000100364	23068	KIAA0930	23313	0	0	0	0	0	1
ENSG00000100372	10331	SLC25A17	10478	0	0	0	0	0	1
ENSG00000100376	34296	FAM118A	55007	0	0	0	0	0	1
ENSG00000100380	6727	ST13	6767	0	0	0	0	0	1
ENSG00000100387	9834	RBX1	9978	0	0	0	0	0	1
ENSG00000100393	2018	EP300	2033	1	1	0	0	0	1
ENSG00000100395	57988	L3MBTL2	83746	0	0	0	0	0	1
ENSG00000100399	80879	CHADL	150356	0	0	0	0	0	1
ENSG00000100401	5873	RANGAP1	5905	0	0	1	0	0	1
ENSG00000100403	23019	ZC3H7B	23264	0	0	0	0	0	1
ENSG00000100410	59034	PHF5A	84844	0	0	0	0	0	1
ENSG00000100412	47	ACO2	50	0	1	1	0	0	1
ENSG00000100413	82709	POLR3H	171568	0	0	0	0	0	1
ENSG00000100416	34976	TRMU	55687	0	0	0	0	0	1
ENSG00000100417	5340	PMM1	5372	0	0	0	0	0	1
ENSG00000100418	27096	PPPDE2	27351	0	0	0	0	0	1
ENSG00000100422	41354	CERK	64781	0	0	0	0	0	1
ENSG00000100425	23527	BRD1	23774	0	0	0	0	0	1
ENSG00000100426	9745	ZBED4	9889	0	0	0	0	0	1
ENSG00000100427	22964	MLC1	23209	0	1	0	1	0	1
ENSG00000100429	58150	HDAC10	83933	0	0	0	0	0	1
ENSG00000100478	10995	AP4S1	11154	0	1	0	1	0	0
ENSG00000100503	30681	NIN	51199	0	1	1	0	0	0
ENSG00000100578	9642	KIAA0586	9786	0	0	0	1	0	0
ENSG00000100596	9376	SPTLC2	9517	0	0	1	0	0	0
ENSG00000100722	55685	ZC3H14	79882	0	1	0	0	0	0
ENSG00000100726	9750	TELO2	9894	0	0	1	0	0	0
ENSG00000100749	7400	VRK1	7443	0	1	0	0	0	0
ENSG00000100811	7485	YY1	7528	1	0	0	0	0	0
ENSG00000100852	391	ARHGAP5	394	1	0	0	0	0	0
ENSG00000100888	36953	CHD8	57680	1	1	1	0	0	0
ENSG00000100983	2920	GSS	2937	0	1	0	0	0	0
ENSG00000100997	25839	ABHD12	26090	0	0	1	0	0	0
ENSG00000101004	22736	NINL	22981	1	0	0	0	0	0
ENSG00000101040	23367	ZMYND8	23613	0	0	1	0	0	0
ENSG00000101126	23149	ADNP	23394	1	1	1	1	0	0
ENSG00000101152	56132	DNAJC5	80331	0	0	1	0	0	0
ENSG00000101204	1129	CHRNA4	1137	0	0	1	0	0	0
ENSG00000101210	1904	EEF1A2	1917	1	1	1	0	0	0
ENSG00000101216	25954	GMEB2	26205	0	0	1	0	0	0
ENSG00000101327	5141	PDYN	5173	0	0	1	0	0	0
ENSG00000101336	3038	HCK	3055	0	0	1	0	0	0
ENSG00000101384	179	JAG1	182	0	1	0	0	0	0
ENSG00000101444	188	AHCY	191	0	1	0	0	0	0
ENSG00000101489	36132	CELF4	56853	1	0	1	0	0	0
ENSG00000101680	94215	LAMA1	284217	1	1	0	0	0	0
ENSG00000101695	34230	RNF125	54941	0	1	0	0	0	0
ENSG00000101752	36807	MIB1	57534	1	0	0	0	0	0
ENSG00000101773	5900	RBBP8	5932	0	1	0	0	0	0
ENSG00000101843	5684	PSMD10	5716	1	0	0	0	0	0
ENSG00000101849	6867	TBL1X	6907	1	0	0	0	0	0
ENSG00000101871	4256	MID1	4281	0	1	0	0	0	0
ENSG00000101883	81420	RHOXF1	158800	1	0	0	0	0	0
ENSG00000101901	55671	ALG13	79868	0	1	1	0	0	0
ENSG00000101935	9805	AMMECR1	9949	0	0	0	1	1	0
ENSG00000101938	60108	CHRDL1	91851	0	0	1	0	0	0
ENSG00000101958	2725	GLRA2	2742	1	0	0	0	0	0
ENSG00000101986	212	ABCD1	215	0	1	0	0	0	0
ENSG00000102003	6815	SYP	6855	0	1	1	0	0	0
ENSG00000102030	8207	NAA10	8260	0	1	1	0	0	0
ENSG00000102078	8897	SLC25A14	9016	1	0	0	0	0	0
ENSG00000102081	2316	FMR1	2332	1	1	1	0	1	0
ENSG00000102100	7312	SLC35A2	7355	0	1	1	0	0	0
ENSG00000102103	9939	PQBP1	10084	0	1	1	0	0	0
ENSG00000102119	1995	EMD	2010	0	1	0	0	0	0
ENSG00000102125	6861	TAZ	6901	0	0	0	1	0	0
ENSG00000102144	5198	PGK1	5230	0	1	1	0	0	0
ENSG00000102172	6571	SMS	6611	0	1	1	0	0	0
ENSG00000102181	57934	CD99L2	83692	1	0	0	0	0	0
ENSG00000102290	27073	PCDH11X	27328	1	0	0	0	0	0
ENSG00000102302	2230	FGD1	2245	1	1	1	0	0	0
ENSG00000102312	41403	PORCN	64840	0	1	0	0	0	0
ENSG00000102359	27031	SRPX2	27286	0	1	1	0	0	0
ENSG00000102383	81431	ZDHHC15	158866	0	0	1	0	0	0
ENSG00000102452	92009	NALCN	259232	0	1	0	1	0	0
ENSG00000102466	2244	FGF14	2259	0	1	0	0	0	0
ENSG00000102468	3336	HTR2A	3356	1	0	1	0	0	0
ENSG00000102743	10021	SLC25A15	10166	0	1	1	0	0	0
ENSG00000102755	2305	FLT1	2321	1	0	0	0	0	0
ENSG00000102781	58267	KATNAL1	84056	1	0	0	0	0	0
ENSG00000102786	26260	INTS6	26512	1	0	0	0	0	0
ENSG00000102805	1194	CLN5	1203	0	1	0	0	0	0
ENSG00000102879	10992	CORO1A	11151	0	0	1	0	0	0
ENSG00000102882	5563	MAPK3	5595	1	0	0	0	0	0
ENSG00000102924	865	CBLN1	869	1	0	0	0	0	0
ENSG00000102935	22845	ZNF423	23090	0	0	0	1	0	0
ENSG00000102974	10517	CTCF	10664	1	1	0	0	0	0
ENSG00000103051	25588	COG4	25839	0	0	1	0	0	0
ENSG00000103061	58349	SLC7A6OS	84138	0	0	1	0	0	0
ENSG00000103089	54991	FA2H	79152	0	1	0	0	0	0
ENSG00000103148	8080	NPRL3	8131	0	0	1	0	0	0
ENSG00000103150	23172	MLYCD	23417	0	1	1	0	0	0
ENSG00000103168	8894	TAF1C	9013	1	0	0	0	0	0
ENSG00000103197	7206	TSC2	7249	1	1	1	0	0	0
ENSG00000103257	8089	SLC7A5	8140	1	0	0	0	0	0
ENSG00000103264	55594	FBXO31	79791	0	1	0	0	0	0
ENSG00000103356	78997	EARS2	124454	0	0	1	0	0	0
ENSG00000103449	6265	SALL1	6299	0	1	0	0	0	0
ENSG00000103489	40764	XYLT1	64131	0	1	0	0	0	0
ENSG00000103494	23077	RPGRIP1L	23322	0	1	0	1	0	0
ENSG00000103507	10149	BCKDK	10295	1	1	1	0	0	0
ENSG00000103528	31240	SYT17	51760	1	0	0	0	0	0
ENSG00000103544	36298	C16orf62	57020	0	0	1	0	0	0
ENSG00000103657	8846	HERC1	8925	0	0	1	0	0	0
ENSG00000103707	78946	MTFMT	123263	0	1	1	0	0	0
ENSG00000103855	56155	CD276	80381	1	0	0	0	0	0
ENSG00000103995	22750	CEP152	22995	0	1	0	0	0	0
ENSG00000104044	4917	OCA2	4948	0	0	1	0	0	0
ENSG00000104093	23067	DMXL2	23312	1	1	0	0	0	0
ENSG00000104133	56009	SPG11	80208	0	1	0	0	0	0
ENSG00000104218	55651	CSPP1	79848	0	1	1	1	0	0
ENSG00000104313	2123	EYA1	2138	0	1	0	0	0	0
ENSG00000104320	4657	NBN	4683	0	1	0	0	0	0
ENSG00000104388	5830	RAB2A	5862	1	0	0	0	0	0
ENSG00000104408	3621	EIF3E	3646	0	0	1	0	0	0
ENSG00000104517	30847	UBR5	51366	1	0	1	0	0	0
ENSG00000104635	23271	SLC39A14	23516	0	0	0	1	0	0
ENSG00000104723	7944	TUSC3	7991	0	1	0	0	0	0
ENSG00000104725	NA	NEFL	NA	1	0	0	0	0	0
ENSG00000104728	9495	ARHGEF10	9639	1	0	0	0	0	0
ENSG00000104738	4148	MCM4	4173	1	0	0	0	0	0
ENSG00000104763	424	ASAH1	427	0	1	1	0	0	0
ENSG00000104774	4100	MAN2B1	4125	0	1	0	0	0	0
ENSG00000104812	2980	GYS1	2997	0	0	1	0	0	0
ENSG00000104833	10235	TUBB4A	10382	0	1	1	0	0	0
ENSG00000104863	40763	LIN7B	64130	1	0	0	0	0	0
ENSG00000104884	2053	ERCC2	2068	0	1	0	0	0	0
ENSG00000104889	10388	RNASEH2A	10535	0	1	0	0	0	0
ENSG00000104936	1748	DMPK	1760	1	1	0	1	0	0
ENSG00000104973	57537	MED25	81857	0	0	1	0	0	0
ENSG00000104998	9326	IL27RA	9466	0	0	1	0	0	0
ENSG00000105048	7095	TNNT1	7138	0	0	0	1	0	0
ENSG00000105053	30712	VRK3	51231	1	0	0	0	0	0
ENSG00000105220	2804	GPI	2821	0	1	0	0	0	0
ENSG00000105221	205	AKT2	208	0	0	1	0	0	0
ENSG00000105357	55587	MYH14	79784	0	0	1	0	0	0
ENSG00000105379	2094	ETFB	2109	1	0	0	0	0	0
ENSG00000105409	475	ATP1A3	478	1	0	1	1	0	0
ENSG00000105464	2889	GRIN2D	2906	0	0	1	0	0	0
ENSG00000105568	5486	PPP2R1A	5518	0	1	1	0	0	0
ENSG00000105647	5264	PIK3R2	5296	1	1	1	0	0	0
ENSG00000105711	6289	SCN1B	6324	0	0	1	0	0	0
ENSG00000105737	2884	GRIK5	2901	1	0	0	0	0	0
ENSG00000105755	23229	ETHE1	23474	0	1	0	1	0	0
ENSG00000105810	1016	CDK6	1021	0	1	0	0	0	0
ENSG00000105926	31158	MPP6	51678	1	0	0	0	0	0
ENSG00000105953	4935	OGDH	4967	0	0	0	1	0	0
ENSG00000105976	4208	MET	4233	1	0	0	0	0	0
ENSG00000105989	7429	WNT2	7472	1	0	0	0	0	0
ENSG00000106009	85813	BRAT1	221927	0	0	1	0	0	0
ENSG00000106089	6764	STX1A	6804	1	0	0	0	0	0
ENSG00000106113	1386	CRHR2	1395	1	0	0	0	0	0
ENSG00000106123	2036	EPHB6	2051	1	0	0	0	0	0
ENSG00000106290	6838	TAF6	6878	1	0	0	0	0	0
ENSG00000106344	34420	RBM28	55131	0	1	0	0	0	0
ENSG00000106366	5022	SERPINE1	5054	1	0	0	0	0	0
ENSG00000106460	33955	TMEM106B	54664	0	0	0	0	1	0
ENSG00000106462	2131	EZH2	2146	0	1	0	0	0	0
ENSG00000106477	61002	CEP41	95681	1	0	0	1	0	0
ENSG00000106571	2720	GLI3	2737	0	1	0	0	0	0
ENSG00000106615	5977	RHEB	6009	1	0	0	0	0	0
ENSG00000106633	2629	GCK	2645	0	0	1	0	0	0
ENSG00000106688	6469	SLC1A1	6505	1	1	1	0	0	0
ENSG00000106692	2203	FKTN	2218	0	1	1	1	0	0
ENSG00000106714	55739	CNTNAP3	79937	1	0	0	0	0	0
ENSG00000106772	81393	PRUNE2	158471	1	0	0	0	0	0
ENSG00000106799	7004	TGFBR1	7046	0	1	0	0	0	0
ENSG00000106976	1747	DNM1	1759	0	1	1	0	0	0
ENSG00000106991	2007	ENG	2022	0	0	1	0	0	0
ENSG00000107077	22836	KDM4C	23081	1	0	0	0	0	0
ENSG00000107099	57386	DOCK8	81704	1	0	1	0	0	0
ENSG00000107104	22944	KANK1	23189	1	0	0	0	0	0
ENSG00000107105	1978	ELAVL2	1993	1	0	0	0	0	0
ENSG00000107147	36855	KCNT1	57582	1	1	1	1	0	0
ENSG00000107186	8702	MPDZ	8777	0	1	1	0	0	0
ENSG00000107371	30493	EXOSC3	51010	0	1	1	1	0	0
ENSG00000107404	1843	DVL1	1855	1	0	0	0	0	0
ENSG00000107518	25782	ATRNL1	26033	1	0	0	0	0	0
ENSG00000107815	35931	C10orf2	56652	0	1	0	0	0	0
ENSG00000107816	58646	LZTS2	84445	1	0	0	0	0	0
ENSG00000108001	90129	EBF3	253738	1	0	0	1	0	0
ENSG00000108055	9003	SMC3	9126	1	1	0	0	0	0
ENSG00000108061	7987	SHOC2	8036	0	1	0	0	0	0
ENSG00000108231	9087	LGI1	9211	0	0	1	0	0	0
ENSG00000108381	440	ASPA	443	0	1	0	1	0	0
ENSG00000108395	4565	TRIM37	4591	0	1	0	0	0	0
ENSG00000108433	9428	GOSR2	9570	0	0	1	0	0	0
ENSG00000108439	34452	PNPO	55163	0	0	1	0	0	0
ENSG00000108474	9347	PIGL	9487	0	1	1	0	0	0
ENSG00000108510	9825	MED13	9969	1	0	0	0	0	0
ENSG00000108551	31135	RASD1	51655	1	0	0	0	0	0
ENSG00000108557	10585	RAI1	10743	1	1	1	0	0	0
ENSG00000108641	26822	B9D1	27077	0	0	0	1	0	0
ENSG00000108733	5161	PEX12	5193	0	1	0	1	0	0
ENSG00000108784	4643	NAGLU	4669	0	1	0	0	0	0
ENSG00000108797	8440	CNTNAP1	8506	0	0	0	1	0	0
ENSG00000108883	9208	EFTUD2	9343	0	1	1	0	0	0
ENSG00000108946	5541	PRKAR1A	5573	0	1	0	0	0	0
ENSG00000108950	34046	FAM20A	54757	0	1	0	0	0	0
ENSG00000108953	7488	YWHAE	7531	1	0	1	0	0	0
ENSG00000109099	5344	PMP22	5376	0	0	1	0	0	0
ENSG00000109158	2541	GABRA4	2557	1	0	0	0	0	0
ENSG00000109323	4101	MANBA	4126	0	1	1	0	0	0
ENSG00000109339	5570	MAPK10	5602	0	0	1	0	0	0
ENSG00000109501	7423	WFS1	7466	0	1	0	0	0	0
ENSG00000109618	30573	SEPSECS	51091	0	1	1	0	0	0
ENSG00000109685	7425	WHSC1	7468	0	0	1	0	0	0
ENSG00000109743	679	BST1	683	1	0	0	0	0	0
ENSG00000109771	35094	LRP2BP	55805	1	0	0	0	0	0
ENSG00000109906	7660	ZBTB16	7704	1	1	0	0	0	0
ENSG00000109911	26357	ELP4	26610	1	0	0	0	1	0
ENSG00000109927	6965	TECTA	7007	1	0	0	0	0	0
ENSG00000110060	57724	PUS3	83480	0	0	1	0	0	0
ENSG00000110074	34861	FOXRED1	55572	0	0	1	0	0	0
ENSG00000110076	9244	NRXN2	9379	1	0	0	0	0	0
ENSG00000110195	2332	FOLR1	2348	0	1	1	0	0	0
ENSG00000110274	22653	CEP164	22897	0	0	1	0	0	0
ENSG00000110395	863	CBL	867	0	1	1	0	0	0
ENSG00000110435	8001	PDHX	8050	0	1	1	0	0	0
ENSG00000110436	6470	SLC1A2	6506	1	0	1	0	0	0
ENSG00000110497	34915	AMBRA1	55626	1	0	0	0	0	0
ENSG00000110717	4702	NDUFS8	4728	0	1	0	0	0	0
ENSG00000110921	4572	MVK	4598	0	1	0	0	0	0
ENSG00000111249	23071	CUX2	23316	1	0	0	0	0	0
ENSG00000111262	3711	KCNA1	3736	0	0	1	0	0	0
ENSG00000111276	1021	CDKN1B	1027	1	0	0	0	0	0
ENSG00000111341	4231	MGP	4256	0	1	0	0	0	0
ENSG00000111615	10944	KRR1	11103	1	0	0	0	0	0
ENSG00000111642	1100	CHD4	1108	0	0	1	0	0	0
ENSG00000111670	54997	GNPTAB	79158	0	1	0	0	0	0
ENSG00000111676	1810	ATN1	1822	0	0	1	0	0	0
ENSG00000111678	76653	C12orf57	113246	1	1	1	0	0	0
ENSG00000111877	90190	MCM9	254394	0	0	1	0	0	0
ENSG00000111961	23083	SASH1	23328	1	0	0	0	0	0
ENSG00000112175	649	BMP5	653	0	0	1	0	0	0
ENSG00000112210	31195	RAB23	51715	0	1	0	0	0	0
ENSG00000112232	83700	KHDRBS2	202559	1	0	0	0	0	0
ENSG00000112234	25984	FBXL4	26235	0	0	0	1	0	0
ENSG00000112282	9302	MED23	9439	0	1	0	0	0	0
ENSG00000112290	8857	WASF1	8936	1	0	0	0	0	0
ENSG00000112294	7869	ALDH5A1	7915	1	1	0	1	1	0
ENSG00000112320	34373	SOBP	55084	0	1	1	0	0	0
ENSG00000112357	5159	PEX7	5191	1	1	1	0	0	0
ENSG00000112365	9697	ZBTB24	9841	0	1	0	0	0	0
ENSG00000112367	9752	FIG4	9896	0	0	1	0	0	0
ENSG00000112425	7911	EPM2A	7957	0	0	1	0	0	0
ENSG00000112541	10688	PDE10A	10846	0	0	1	0	0	0
ENSG00000112640	5496	PPP2R5D	5528	1	1	1	1	0	0
ENSG00000112655	5722	PTK7	5754	1	0	0	0	0	0
ENSG00000112679	36219	DUSP22	56940	1	0	0	0	0	0
ENSG00000112902	8917	SEMA5A	9037	1	0	0	0	0	0
ENSG00000113100	1002	CDH9	1007	1	0	0	0	0	0
ENSG00000113163	9942	COL4A3BP	10087	0	0	1	0	0	0
ENSG00000113273	408	ARSB	411	0	1	0	0	0	0
ENSG00000113327	2550	GABRG2	2566	0	0	1	1	0	0
ENSG00000113328	895	CCNG1	900	1	0	0	0	0	0
ENSG00000113448	5112	PDE4D	5144	0	1	0	0	0	0
ENSG00000113522	9966	RAD50	10111	0	1	0	0	0	0
ENSG00000113555	30775	PCDH12	51294	0	0	1	0	0	0
ENSG00000113575	5483	PPP2CA	5515	1	0	0	0	0	0
ENSG00000113657	1797	DPYSL3	1809	1	0	0	0	0	0
ENSG00000113742	56116	CPEB4	80315	1	0	0	0	0	0
ENSG00000113805	5035	CNTN3	5067	1	0	0	0	0	0
ENSG00000113851	30667	CRBN	51185	0	1	0	0	0	0
ENSG00000113966	58311	ARL6	84100	0	1	0	0	0	0
ENSG00000114054	5064	PCCB	5096	1	0	0	1	0	0
ENSG00000114062	7294	UBE3A	7337	1	1	1	1	1	0
ENSG00000114166	8773	KAT2B	8850	1	0	0	0	0	0
ENSG00000114251	7431	WNT5A	7474	0	1	0	0	0	0
ENSG00000114279	2242	FGF12	2257	0	0	1	0	0	0
ENSG00000114374	8234	USP9Y	8287	1	0	0	0	0	0
ENSG00000114388	10494	NPRL2	10641	0	0	1	0	0	0
ENSG00000114480	2616	GBE1	2632	0	0	1	1	0	0
ENSG00000114491	7329	UMPS	7372	0	1	0	0	0	0
ENSG00000114859	1172	CLCN2	1181	0	0	1	0	0	0
ENSG00000114861	26831	FOXP1	27086	1	1	0	0	1	0
ENSG00000114923	6472	SLC4A3	6508	0	0	1	0	0	0
ENSG00000114956	1704	DGUOK	1716	0	0	0	1	0	0
ENSG00000114988	57264	LMAN2L	81562	0	0	1	0	0	0
ENSG00000115138	5411	POMC	5443	0	0	1	0	0	0
ENSG00000115159	2803	GPD2	2820	1	0	0	0	0	0
ENSG00000115170	87	ACVR1	90	0	1	1	0	0	0
ENSG00000115194	7736	SLC30A3	7781	1	0	1	0	0	0
ENSG00000115204	4332	MPV17	4358	0	0	0	1	0	0
ENSG00000115232	3651	ITGA4	3676	1	0	0	0	0	0
ENSG00000115267	40768	IFIH1	64135	0	1	1	0	0	0
ENSG00000115275	7795	MOGS	7841	0	1	1	0	0	0
ENSG00000115286	119456	NDUFS7	374291	0	1	0	0	0	0
ENSG00000115355	34993	CCDC88A	55704	0	0	1	0	0	0
ENSG00000115415	6732	STAT1	6772	1	0	1	0	0	0
ENSG00000115421	41433	PAPOLG	64895	1	0	0	0	0	0
ENSG00000115425	35113	PECR	55825	1	0	0	0	0	0
ENSG00000115484	10428	CCT4	10575	1	0	0	0	0	0
ENSG00000115507	4981	OTX1	5013	1	0	0	0	0	0
ENSG00000115524	23206	SF3B1	23451	1	0	0	0	0	0
ENSG00000115525	8790	ST3GAL5	8869	0	1	1	0	0	0
ENSG00000115677	3052	HDLBP	3069	1	0	0	0	0	0
ENSG00000115760	36721	BIRC6	57448	1	0	0	0	0	0
ENSG00000115827	55869	DCAF17	80067	0	1	0	0	0	0
ENSG00000115839	22686	RAB3GAP1	22930	0	1	0	1	0	0
ENSG00000115840	8538	SLC25A12	8604	1	0	1	0	0	0
ENSG00000115844	1734	DLX2	1746	1	0	0	0	0	0
ENSG00000115904	6614	SOS1	6654	0	1	0	0	0	0
ENSG00000116096	6657	SPR	6697	0	1	0	1	0	0
ENSG00000116117	78651	PARD3B	117583	1	0	0	0	0	0
ENSG00000116133	1706	DHCR24	1718	0	1	1	0	0	0
ENSG00000116141	4114	MARK1	4139	1	0	0	0	0	0
ENSG00000116171	6307	SCP2	6342	1	0	0	0	0	0
ENSG00000116198	9587	CEP104	9731	0	0	0	1	0	0
ENSG00000116254	25787	CHD5	26038	1	0	0	0	0	0
ENSG00000116337	268	AMPD2	271	0	1	1	0	0	0
ENSG00000116539	35158	ASH1L	55870	1	0	0	0	0	0
ENSG00000116544	37326	DLGAP3	58512	1	0	0	0	0	0
ENSG00000116641	59596	DOCK7	85440	0	0	1	0	0	0
ENSG00000116675	9685	DNAJC6	9829	0	0	1	0	0	0
ENSG00000116745	6089	RPE65	6121	0	1	0	0	0	0
ENSG00000116754	9162	SRSF11	9295	1	0	0	0	0	0
ENSG00000116761	1480	CTH	1491	0	0	1	0	0	0
ENSG00000116852	22801	KIF21B	23046	1	0	0	0	0	0
ENSG00000116906	8382	GNPAT	8443	0	1	1	0	0	0
ENSG00000116962	4780	NID1	4811	0	0	1	0	0	0
ENSG00000116984	4522	MTR	4548	1	1	1	1	0	0
ENSG00000117009	8498	KMO	8564	1	0	0	0	0	0
ENSG00000117016	9639	RIMS3	9783	1	0	0	0	0	0
ENSG00000117020	9856	AKT3	10000	0	1	1	0	0	0
ENSG00000117114	23021	LPHN2	23266	0	0	1	0	0	0
ENSG00000117139	10607	KDM5B	10765	1	0	0	0	0	0
ENSG00000117308	2566	GALE	2582	0	1	0	1	0	0
ENSG00000117335	4154	CD46	4179	0	0	1	0	0	0
ENSG00000117362	30589	APH1A	51107	1	0	0	0	0	0
ENSG00000117394	6477	SLC2A1	6513	0	1	1	0	0	0
ENSG00000117450	5020	PRDX1	5052	0	0	0	1	0	0
ENSG00000117569	37188	PTBP2	58155	1	0	0	0	0	0
ENSG00000117593	34446	DARS2	55157	0	1	1	0	0	0
ENSG00000117594	3270	HSD11B1	3290	1	0	0	0	0	0
ENSG00000117620	23198	SLC35A3	23443	1	1	1	0	0	0
ENSG00000117713	8236	ARID1A	8289	0	1	1	0	0	0
ENSG00000117984	1498	CTSD	1509	0	1	0	0	0	0
ENSG00000118004	54829	COLEC11	78989	0	1	0	0	0	0
ENSG00000118007	10128	STAG1	10274	1	0	0	0	0	0
ENSG00000118046	6754	STK11	6794	0	0	1	0	0	0
ENSG00000118058	4272	MLL	4297	0	1	0	0	0	0
ENSG00000118162	10974	KPTN	11133	1	1	1	0	0	0
ENSG00000118194	7096	TNNT2	7139	0	1	0	0	0	0
ENSG00000118197	57723	DDX59	83479	0	1	0	0	0	0
ENSG00000118200	23026	CAMSAP2	23271	1	0	0	0	0	0
ENSG00000118246	22624	FASTKD2	22868	0	1	0	1	0	0
ENSG00000118257	8751	NRP2	8828	1	0	0	0	0	0
ENSG00000118402	6745	ELOVL4	6785	0	1	0	0	0	0
ENSG00000118432	1259	CNR1	1268	1	0	0	0	0	0
ENSG00000118482	23224	PHF3	23469	1	0	0	0	0	0
ENSG00000118596	9070	SLC16A7	9194	1	0	0	0	0	0
ENSG00000118873	25531	RAB3GAP2	25782	0	1	0	1	0	0
ENSG00000119042	23069	SATB2	23314	1	1	1	1	0	0
ENSG00000119121	80143	TRPM6	140803	0	0	1	0	0	0
ENSG00000119125	9471	GDA	9615	1	0	0	0	0	0
ENSG00000119185	9140	ITGB1BP1	9270	0	0	1	0	0	0
ENSG00000119335	6382	SET	6418	1	0	0	0	0	0
ENSG00000119523	59535	ALG2	85365	0	1	1	0	0	0
ENSG00000119655	10430	NPC2	10577	0	1	0	1	0	0
ENSG00000119669	40840	IRF2BPL	64207	1	0	0	0	0	0
ENSG00000119688	5794	ABCD4	5826	0	1	0	1	0	0
ENSG00000119723	30487	COQ6	51004	0	0	1	1	0	0
ENSG00000119772	1776	DNMT3A	1788	1	0	1	0	0	0
ENSG00000119866	32815	BCL11A	53335	1	0	0	1	0	0
ENSG00000119899	26251	SLC17A5	26503	0	1	0	0	0	0
ENSG00000119938	5475	PPP1R3C	5507	0	0	1	0	0	0
ENSG00000119977	25872	TCTN3	26123	0	1	0	1	0	0
ENSG00000120071	94160	KIAA1267	284058	0	1	0	0	0	0
ENSG00000120088	1385	CRHR1	1394	0	0	1	0	0	0
ENSG00000120149	4462	MSX2	4488	0	0	1	0	0	0
ENSG00000120370	60171	GORAB	92344	0	1	0	0	0	0
ENSG00000120451	124990	SNX19	399979	1	0	0	0	0	0
ENSG00000120457	3737	KCNJ5	3762	0	0	1	0	0	0
ENSG00000120725	40975	SIL1	64374	0	1	0	1	0	0
ENSG00000120903	1127	CHRNA2	1135	0	0	1	0	0	0
ENSG00000121073	10091	SLC35B1	10237	1	0	0	0	0	0
ENSG00000121297	36889	TSHZ3	57616	1	0	0	0	0	0
ENSG00000121680	9273	PEX16	9409	0	1	0	1	0	0
ENSG00000121769	2155	FABP3	2170	1	0	0	0	0	0
ENSG00000121879	5258	PIK3CA	5290	0	1	0	1	0	0
ENSG00000121897	10861	LIAS	11019	0	0	1	1	0	0
ENSG00000121933	137	ADORA3	140	1	0	0	0	0	0
ENSG00000121957	29634	GPSM2	29899	0	0	1	0	0	0
ENSG00000121966	7806	CXCR4	7852	0	0	1	0	0	0
ENSG00000122126	4921	OCRL	4952	1	1	0	1	0	0
ENSG00000122335	59137	SERAC1	84947	0	1	0	1	0	0
ENSG00000122507	26986	BBS9	27241	0	1	0	0	0	0
ENSG00000122584	29743	NXPH1	30010	1	0	0	0	0	0
ENSG00000122591	58866	FAM126A	84668	0	1	0	1	0	0
ENSG00000122641	3599	INHBA	3624	0	0	0	0	1	0
ENSG00000122691	7248	TWIST1	7291	0	1	0	0	0	0
ENSG00000122728	79744	TAF1L	138474	1	0	0	0	0	0
ENSG00000122861	5296	PLAU	5328	0	0	0	0	1	0
ENSG00000122877	1946	EGR2	1959	1	0	0	0	0	0
ENSG00000122971	32	ACADS	35	0	0	1	1	0	0
ENSG00000123066	23144	MED13L	23389	1	1	1	1	0	0
ENSG00000123106	34586	CCDC91	55297	1	0	0	0	0	0
ENSG00000123159	10597	GIPC1	10755	0	0	1	0	0	0
ENSG00000123453	1745	SARDH	1757	0	1	0	0	0	0
ENSG00000123473	6455	STIL	6491	0	1	0	0	0	0
ENSG00000123552	59202	USP45	85015	1	0	0	0	0	0
ENSG00000123560	5322	PLP1	5354	0	1	1	1	0	0
ENSG00000123607	55612	TTC21B	79809	0	0	0	1	0	0
ENSG00000123610	7087	TNFAIP6	7130	0	0	1	0	0	0
ENSG00000123636	29727	BAZ2B	29994	1	0	0	0	0	0
ENSG00000123700	3734	KCNJ2	3759	1	0	1	0	0	0
ENSG00000124126	36853	PREX1	57580	1	0	0	0	0	0
ENSG00000124140	36741	SLC12A5	57468	1	0	1	1	0	0
ENSG00000124155	31084	PIGT	51604	0	1	1	1	0	0
ENSG00000124198	10417	ARFGEF2	10564	0	1	1	0	0	0
ENSG00000124275	4526	MTRR	4552	0	1	0	1	0	0
ENSG00000124299	5152	PEPD	5184	0	1	0	0	0	0
ENSG00000124313	22851	IQSEC2	23096	1	1	1	0	0	0
ENSG00000124356	10470	STAMBP	10617	0	1	1	0	0	0
ENSG00000124406	10249	ATP8A1	10396	1	0	0	0	0	0
ENSG00000124479	4667	NDP	4693	0	1	1	0	0	0
ENSG00000124486	8187	USP9X	8239	0	1	1	0	0	0
ENSG00000124491	2147	F13A1	2162	1	0	0	0	0	0
ENSG00000124493	2897	GRM4	2914	1	0	0	0	0	0
ENSG00000124587	5158	PEX6	5190	0	1	0	1	0	0
ENSG00000124615	4311	MOCS1	4337	0	1	0	0	0	0
ENSG00000124767	2722	GLO1	2739	1	0	0	0	0	0
ENSG00000124788	6276	ATXN1	6310	0	0	0	1	0	0
ENSG00000125124	580	BBS2	583	0	1	0	0	0	0
ENSG00000125257	10111	ABCC4	10257	0	0	0	0	1	0
ENSG00000125351	41627	UPF3B	65109	1	1	0	0	0	0
ENSG00000125352	7693	RNF113A	7737	0	1	0	0	0	0
ENSG00000125356	4668	NDUFA1	4694	0	1	0	0	0	0
ENSG00000125378	648	BMP4	652	0	0	1	0	0	0
ENSG00000125505	54982	MBOAT7	79143	1	0	0	0	0	0
ENSG00000125618	7803	PAX8	7849	0	1	0	0	0	0
ENSG00000125656	8141	CLPP	8192	0	0	1	0	0	0
ENSG00000125675	2875	GRIA3	2892	0	1	1	0	0	0
ENSG00000125676	36463	THOC2	57187	0	1	1	0	0	0
ENSG00000125695	60168	STRADA	92335	0	0	1	0	0	0
ENSG00000125730	714	C3	718	0	0	1	0	0	0
ENSG00000125779	55827	PANK2	80025	0	1	0	0	0	0
ENSG00000125814	40551	NAPB	63908	0	0	1	0	0	0
ENSG00000125835	6588	SNRPB	6628	0	1	0	0	0	0
ENSG00000125863	8144	MKKS	8195	0	1	0	0	0	0
ENSG00000125875	79311	TBC1D20	128637	0	1	0	1	0	0
ENSG00000125877	3679	ITPA	3704	0	0	1	0	0	0
ENSG00000125885	58716	MCM8	84515	0	0	1	0	0	0
ENSG00000126012	8190	KDM5C	8242	1	1	1	0	0	0
ENSG00000126091	6451	ST3GAL3	6487	0	1	1	0	0	0
ENSG00000126267	1331	COX6B1	1340	0	1	0	1	0	0
ENSG00000126351	7024	THRA	7067	1	0	0	0	0	0
ENSG00000126368	9430	NR1D1	9572	1	0	0	0	0	0
ENSG00000126456	3636	IRF3	3661	0	0	1	0	0	0
ENSG00000126464	36752	PRR12	57479	1	0	0	0	0	0
ENSG00000126522	432	ASL	435	0	1	0	0	0	0
ENSG00000126524	30601	SBDS	51119	0	1	0	0	0	0
ENSG00000126705	26990	AHDC1	27245	1	1	0	1	0	0
ENSG00000126934	5573	MAP2K2	5605	0	1	0	0	0	0
ENSG00000126945	3168	HNRNPH2	3188	1	0	0	1	0	0
ENSG00000126970	35193	ZC4H2	55906	0	1	1	0	0	0
ENSG00000127124	37693	HIVEP3	59269	1	0	0	0	0	0
ENSG00000127241	5616	MASP1	5648	0	1	0	0	0	0
ENSG00000127329	5755	PTPRB	5787	1	0	0	0	0	0
ENSG00000127415	3405	IDUA	3425	0	1	0	0	0	0
ENSG00000127418	33139	FGFRL1	53834	0	0	0	1	0	0
ENSG00000127616	6558	SMARCA4	6597	1	1	1	0	0	0
ENSG00000127663	22785	KDM4B	23030	1	0	0	0	0	0
ENSG00000127666	80674	TICAM1	148022	0	0	1	0	0	0
ENSG00000127688	8088	GAN	8139	1	0	0	0	0	0
ENSG00000127831	7386	VIL1	7429	1	0	0	0	0	0
ENSG00000127914	9997	AKAP9	10142	1	0	0	0	0	0
ENSG00000127946	3074	HIP1	3092	0	0	1	0	0	0
ENSG00000127952	31137	STYXL1	51657	0	0	1	0	0	0
ENSG00000127980	5157	PEX1	5189	0	1	0	1	0	0
ENSG00000127990	8831	SGCE	8910	0	0	1	0	1	0
ENSG00000128039	55447	SRD5A3	79644	0	1	0	0	0	0
ENSG00000128159	59548	TUBGCP6	85378	0	1	0	0	0	1
ENSG00000128271	132	ADORA2A	135	1	0	1	0	0	0
ENSG00000128274	NA	A4GALT	NA	0	0	0	0	0	1
ENSG00000128285	2830	MCHR1	2847	0	0	0	0	0	1
ENSG00000128408	25899	RIBC2	26150	0	0	0	0	0	1
ENSG00000128512	9588	DOCK4	9732	1	0	0	0	0	0
ENSG00000128513	25662	POT1	25913	1	0	0	0	0	0
ENSG00000128567	5388	PODXL	5420	0	0	1	0	0	0
ENSG00000128573	60634	FOXP2	93986	1	1	0	0	1	0
ENSG00000128594	40734	LRRC4	64101	1	0	0	0	0	0
ENSG00000128609	4672	NDUFA5	4698	1	0	0	0	0	0
ENSG00000128654	10504	MTX2	10651	1	0	0	0	0	0
ENSG00000128656	1115	CHN1	1123	0	0	1	0	0	0
ENSG00000128683	2555	GAD1	2571	1	1	0	0	0	0
ENSG00000128731	8845	HERC2	8924	1	1	1	1	1	0
ENSG00000128739	6598	SNRPN	6638	1	0	1	1	1	0
ENSG00000128833	35217	MYO5C	55930	1	0	0	0	0	0
ENSG00000128849	59142	CGNL1	84952	1	0	0	0	0	0
ENSG00000128908	33908	INO80	54617	0	0	1	0	0	0
ENSG00000128973	34271	CLN6	54982	0	1	0	0	0	0
ENSG00000129071	8851	MBD4	8930	1	0	0	0	0	0
ENSG00000129159	3721	KCNC1	3746	1	0	1	0	0	0
ENSG00000129214	6426	SHBG	6462	0	0	0	0	1	0
ENSG00000129255	9385	MPDU1	9526	0	1	1	0	0	0
ENSG00000129467	83447	ADCY4	196883	0	0	0	0	1	0
ENSG00000129696	55986	TTI2	80185	1	1	0	0	0	0
ENSG00000129757	1022	CDKN1C	1028	0	0	0	1	0	0
ENSG00000129911	58089	KLF16	83855	1	0	0	0	0	0
ENSG00000130005	2577	GAMT	2593	0	1	0	1	0	0
ENSG00000130035	26038	GALNT8	26290	1	0	0	0	0	0
ENSG00000130158	36845	DOCK6	57572	0	1	1	0	0	0
ENSG00000130203	345	APOE	348	0	0	0	0	1	0
ENSG00000130226	1792	DPP6	1804	1	0	0	0	0	0
ENSG00000130294	544	KIF1A	547	0	1	1	0	0	0
ENSG00000130299	58901	GTPBP3	84705	0	0	1	0	0	0
ENSG00000130402	78	ACTN4	81	1	0	0	0	0	0
ENSG00000130414	4679	NDUFA10	4705	0	1	0	0	0	0
ENSG00000130449	36961	ZSWIM6	57688	1	1	1	0	0	0
ENSG00000130477	22780	UNC13A	23025	1	0	0	0	0	0
ENSG00000130489	9853	SCO2	9997	0	0	1	0	0	1
ENSG00000130508	7791	PXDN	7837	1	0	0	0	0	0
ENSG00000130540	25579	SULT4A1	25830	0	0	0	0	0	1
ENSG00000130635	1280	COL5A1	1289	0	0	0	1	0	0
ENSG00000130638	25563	ATXN10	25814	0	0	1	0	0	1
ENSG00000130653	119615	PNPLA7	375775	1	0	0	0	0	0
ENSG00000130707	442	ASS1	445	1	1	0	0	0	0
ENSG00000130714	10438	POMT1	10585	1	1	1	0	0	0
ENSG00000130723	58922	PRRC2B	84726	0	0	1	0	0	0
ENSG00000130749	22966	ZC3H4	23211	1	0	0	0	0	0
ENSG00000130811	8597	EIF3G	8666	1	0	0	0	0	0
ENSG00000130816	1774	DNMT1	1786	0	0	1	0	0	0
ENSG00000130821	6499	SLC6A8	6535	1	1	1	0	0	0
ENSG00000130826	1724	DKC1	1736	0	1	1	0	0	0
ENSG00000130827	34847	PLXNA3	55558	1	0	0	0	0	0
ENSG00000130921	60063	C12orf65	91574	0	1	0	0	0	0
ENSG00000130935	25675	NOL11	25926	0	0	1	0	0	0
ENSG00000130985	7274	UBA1	7317	0	0	0	1	0	0
ENSG00000131018	23100	SYNE1	23345	1	1	0	1	0	0
ENSG00000131089	22984	ARHGEF9	23229	1	1	1	0	0	0
ENSG00000131095	2654	GFAP	2670	0	1	1	0	0	0
ENSG00000131165	5087	CHMP1A	5119	1	1	0	0	0	0
ENSG00000131238	5506	PPT1	5538	0	1	0	0	0	0
ENSG00000131263	30614	RLIM	51132	1	1	0	0	0	0
ENSG00000131323	7144	TRAF3	7187	0	0	1	0	0	0
ENSG00000131374	9635	TBC1D5	9779	1	0	0	0	0	0
ENSG00000131381	40778	ZFYVE20	64145	0	0	1	0	0	0
ENSG00000131398	3723	KCNC3	3748	0	1	1	0	0	0
ENSG00000131408	7333	NR1H2	7376	1	0	0	0	0	0
ENSG00000131462	7240	TUBG1	7283	0	0	1	0	0	0
ENSG00000131495	4669	NDUFA2	4695	0	0	1	0	0	0
ENSG00000131504	1717	DIAPH1	1729	0	0	1	0	0	0
ENSG00000131626	8434	PPFIA1	8500	1	0	0	0	0	0
ENSG00000131652	55065	THOC6	79228	0	1	0	0	0	0
ENSG00000131653	58441	TRAF7	84231	1	0	0	0	0	0
ENSG00000131771	58363	PPP1R1B	84152	1	0	0	0	0	0
ENSG00000131773	10509	KHDRBS3	10656	1	0	0	0	0	0
ENSG00000131778	9415	CHD1L	9557	0	0	1	0	0	0
ENSG00000131779	8722	PEX11B	8799	0	1	0	0	0	0
ENSG00000131795	9795	RBM8A	9939	1	0	0	0	0	0
ENSG00000131828	5128	PDHA1	5160	0	1	1	0	0	0
ENSG00000131844	40720	MCCC2	64087	0	1	1	0	0	0
ENSG00000131931	34434	THAP1	55145	0	0	1	0	0	0
ENSG00000131979	2627	GCH1	2643	0	1	1	0	0	0
ENSG00000132024	34151	CC2D1A	54862	1	0	0	0	0	0
ENSG00000132153	22663	DHX30	22907	1	0	0	0	1	0
ENSG00000132155	5862	RAF1	5894	0	1	0	0	0	0
ENSG00000132294	22922	EFR3A	23167	1	0	0	0	0	0
ENSG00000132326	8787	PER2	8864	1	0	0	0	0	0
ENSG00000132356	5530	PRKAA1	5562	0	0	0	1	0	0
ENSG00000132510	22890	KDM6B	23135	1	0	0	0	0	0
ENSG00000132535	1730	DLG4	1742	1	0	0	0	0	0
ENSG00000132549	81305	VPS13B	157680	1	1	0	1	0	0
ENSG00000132604	6972	TERF2	7014	1	0	0	0	0	0
ENSG00000132639	6576	SNAP25	6616	1	0	1	0	0	0
ENSG00000132763	25723	MMACHC	25974	0	1	0	1	0	0
ENSG00000132842	8480	AP3B1	8546	0	1	0	0	0	0
ENSG00000132932	31241	ATP8A2	51761	0	1	1	1	0	0
ENSG00000132965	238	ALOX5AP	241	1	0	0	0	0	0
ENSG00000133019	1123	CHRM3	1131	1	0	0	0	0	0
ENSG00000133026	4602	MYH10	4628	1	0	0	0	0	0
ENSG00000133028	6306	SCO1	6341	0	1	0	1	0	0
ENSG00000133103	36784	COG6	57511	0	1	1	0	0	0
ENSG00000133195	83630	SLC39A11	201266	1	0	0	0	0	0
ENSG00000133216	2033	EPHB2	2048	1	0	1	0	0	0
ENSG00000133424	9091	LARGE	9215	0	1	0	0	0	0
ENSG00000133665	58542	DYDC2	84332	1	0	0	0	0	0
ENSG00000133703	3820	KRAS	3845	0	1	1	0	1	0
ENSG00000133958	36851	UNC79	57578	1	0	0	0	0	0
ENSG00000134049	30606	IER3IP1	51124	0	1	1	0	0	0
ENSG00000134115	27000	CNTN6	27255	1	0	0	0	0	0
ENSG00000134121	10594	CHL1	10752	0	0	1	0	0	0
ENSG00000134138	4187	MEIS2	4212	1	0	0	0	0	0
ENSG00000134184	2927	GSTM1	2944	1	0	0	0	0	0
ENSG00000134262	10559	AP4B1	10717	0	1	1	1	0	0
ENSG00000134323	4587	MYCN	4613	0	1	0	0	0	0
ENSG00000134532	6620	SOX5	6660	1	0	1	0	0	0
ENSG00000134698	82978	EIF2C4	192670	0	0	1	0	0	0
ENSG00000134780	743	DAGLA	747	1	0	0	0	0	0
ENSG00000134851	35146	TMEM165	55858	0	1	0	0	0	0
ENSG00000134853	5124	PDGFRA	5156	0	1	0	0	0	0
ENSG00000134871	1275	COL4A2	1284	0	1	1	0	0	0
ENSG00000134899	2058	ERCC5	2073	0	1	0	0	0	0
ENSG00000134905	55390	CARS2	79587	0	0	1	0	0	0
ENSG00000134909	9599	ARHGAP32	9743	1	0	0	0	0	0
ENSG00000134910	3678	STT3A	3703	0	1	1	0	0	0
ENSG00000134982	321	APC	324	1	0	0	0	0	0
ENSG00000135046	298	ANXA1	301	1	0	0	0	0	0
ENSG00000135069	29701	PSAT1	29968	0	0	1	0	0	0
ENSG00000135124	4993	P2RX4	5025	1	0	0	0	0	0
ENSG00000135297	25570	MTO1	25821	0	0	1	0	0	0
ENSG00000135312	3331	HTR1B	3351	1	0	0	0	0	0
ENSG00000135316	10345	SYNCRIP	10492	1	0	0	0	0	0
ENSG00000135317	36507	SNX14	57231	1	1	0	0	0	0
ENSG00000135365	30798	PHF21A	51317	1	0	0	0	0	0
ENSG00000135387	4051	CAPRIN1	4076	1	0	0	0	0	0
ENSG00000135439	78291	AGAP2	116986	1	0	0	0	0	0
ENSG00000135454	2567	B4GALNT1	2583	0	1	0	0	0	0
ENSG00000135541	34095	AHI1	54806	1	1	1	1	0	0
ENSG00000135631	25805	RAB11FIP5	26056	1	0	0	0	0	0
ENSG00000135655	9814	USP15	9958	1	0	0	0	0	0
ENSG00000135677	2782	GNS	2799	0	1	0	0	0	0
ENSG00000135702	23317	CHST5	23563	1	0	0	0	0	0
ENSG00000135821	2735	GLUL	2752	0	0	1	0	0	0
ENSG00000135905	34908	DOCK10	55619	1	0	0	0	0	0
ENSG00000135917	56478	SLC19A3	80704	0	0	1	0	0	0
ENSG00000135929	1581	CYP27A1	1593	1	1	0	0	0	0
ENSG00000135999	25871	EPC2	26122	1	0	0	0	0	0
ENSG00000136099	5068	PCDH8	5100	1	0	0	0	0	0
ENSG00000136104	55424	RNASEH2B	79621	0	1	0	0	0	0
ENSG00000136143	8726	SUCLA2	8803	0	1	0	1	0	0
ENSG00000136169	58086	SETDB2	83852	1	0	0	0	0	0
ENSG00000136238	5847	RAC1	5879	1	0	0	0	0	0
ENSG00000136305	26886	CIDEB	27141	0	0	0	0	1	0
ENSG00000136352	7037	NKX2-1	7080	0	1	0	0	0	0
ENSG00000136425	10371	CIB2	10518	1	0	0	0	0	0
ENSG00000136463	30686	TACO1	51204	0	1	0	1	0	0
ENSG00000136531	6291	SCN2A	6326	1	1	1	0	0	0
ENSG00000136535	10558	TBR1	10716	1	0	0	0	0	0
ENSG00000136541	36744	ERMN	57471	1	0	0	0	0	0
ENSG00000136546	6297	SCN7A	6332	1	0	0	0	0	0
ENSG00000136636	30615	KCTD3	51133	0	0	1	0	0	0
ENSG00000136653	57835	RASSF5	83593	1	0	0	0	0	0
ENSG00000136717	271	BIN1	274	1	0	0	0	0	0
ENSG00000136810	7252	TXN	7295	0	0	0	0	1	0
ENSG00000136827	1849	TOR1A	1861	0	0	1	0	0	0
ENSG00000136854	6772	STXBP1	6812	1	1	1	0	0	0
ENSG00000136861	35044	CDK5RAP2	55755	0	1	0	0	0	0
ENSG00000136908	8741	DPM2	8818	0	0	1	0	0	0
ENSG00000136928	9426	GABBR2	9568	1	0	1	0	0	0
ENSG00000136936	7464	XPA	7507	0	1	0	0	0	0
ENSG00000137074	34129	APTX	54840	0	1	0	0	0	0
ENSG00000137075	81029	RNF38	152006	1	0	0	0	0	0
ENSG00000137267	7237	TUBB2A	7280	0	0	1	0	0	0
ENSG00000137269	34516	LRRC1	55227	1	0	0	0	0	0
ENSG00000137285	110335	TUBB2B	347733	0	1	1	0	0	0
ENSG00000137411	36452	VARS2	57176	0	0	1	0	0	0
ENSG00000137513	55534	NARS2	79731	0	0	1	0	0	0
ENSG00000137672	7182	TRPC6	7225	1	0	0	0	0	0
ENSG00000137693	10266	YAP1	10413	0	1	1	0	0	0
ENSG00000137713	5487	PPP2R1B	5519	1	0	0	0	0	0
ENSG00000137801	7015	THBS1	7057	1	0	0	0	0	0
ENSG00000137868	40853	STRA6	64220	0	1	0	0	0	0
ENSG00000137992	1617	DBT	1629	0	1	0	0	0	0
ENSG00000138002	25909	IFT172	26160	0	1	0	0	0	0
ENSG00000138031	106	ADCY3	109	1	0	0	0	0	0
ENSG00000138035	59669	PNPT1	87178	0	0	1	0	0	0
ENSG00000138078	9439	PREPL	9581	0	0	0	1	0	0
ENSG00000138079	6483	SLC3A1	6519	0	0	0	1	0	0
ENSG00000138081	56005	FBXO11	80204	1	0	0	0	0	0
ENSG00000138083	6460	SIX3	6496	0	1	0	0	0	0
ENSG00000138095	9983	LRPPRC	10128	1	1	1	0	0	0
ENSG00000138160	3807	KIF11	3832	0	1	1	0	0	0
ENSG00000138185	948	ENTPD1	953	0	1	0	0	0	0
ENSG00000138190	33827	EXOC6	54536	1	0	0	0	0	0
ENSG00000138207	5918	RBP4	5950	0	0	1	0	0	0
ENSG00000138346	1751	DNA2	1763	0	1	0	0	0	0
ENSG00000138363	468	ATIC	471	0	1	1	0	0	0
ENSG00000138411	36793	HECW2	57520	1	0	1	1	0	0
ENSG00000138622	9877	HCN4	10021	0	0	1	0	0	0
ENSG00000138629	59183	UBL7	84993	1	0	0	0	0	0
ENSG00000138639	57722	ARHGAP24	83478	1	0	0	0	0	0
ENSG00000138650	36848	PCDH10	57575	1	0	0	0	0	0
ENSG00000138686	34501	BBS7	55212	0	1	0	0	0	0
ENSG00000138759	55945	FRAS1	80144	0	1	0	0	0	0
ENSG00000138760	945	SCARB2	950	0	0	1	0	0	0
ENSG00000138778	1055	CENPE	1062	0	0	1	0	0	0
ENSG00000138821	40749	SLC39A8	64116	0	0	1	0	0	0
ENSG00000138944	59523	KIAA1644	85352	0	0	0	0	0	1
ENSG00000139174	80348	PRICKLE1	144165	1	0	1	0	0	0
ENSG00000139182	9602	CLSTN3	9746	1	0	0	0	0	0
ENSG00000139197	5798	PEX5	5830	0	1	1	1	0	0
ENSG00000139219	1271	COL2A1	1280	0	0	1	0	0	0
ENSG00000139531	6781	SUOX	6821	0	1	0	0	0	0
ENSG00000139613	6561	SMARCC2	6601	1	0	0	0	0	0
ENSG00000139687	5893	RB1	5925	0	0	1	0	0	0
ENSG00000139718	22822	SETD1B	23067	1	0	0	0	0	0
ENSG00000139726	8496	DENR	8562	1	0	0	0	0	0
ENSG00000139734	57306	DIAPH3	81624	1	0	0	0	0	0
ENSG00000139767	58731	SRRM4	84530	1	0	0	0	0	0
ENSG00000139915	81501	MDGA2	161357	1	0	0	0	0	0
ENSG00000140015	26878	KCNH5	27133	0	0	1	0	0	0
ENSG00000140157	57296	NIPA2	81614	1	0	1	0	0	0
ENSG00000140199	9846	SLC12A6	9990	0	1	1	0	0	0
ENSG00000140463	582	BBS4	585	1	1	0	0	0	0
ENSG00000140471	34469	LINS	55180	0	1	0	0	0	0
ENSG00000140488	38108	CELF6	60677	1	0	0	0	0	0
ENSG00000140521	5396	POLG	5428	0	1	0	1	0	0
ENSG00000140538	4885	NTRK3	4916	1	0	0	0	0	0
ENSG00000140557	8077	ST8SIA2	8128	1	0	1	0	0	0
ENSG00000140650	5341	PMM2	5373	0	1	0	1	0	0
ENSG00000140694	5041	PARN	5073	0	0	1	0	0	0
ENSG00000140718	54908	FTO	79068	0	1	1	0	0	0
ENSG00000140854	10154	KATNB1	10300	0	0	1	0	0	0
ENSG00000140873	82004	ADAMTS18	170692	1	0	0	0	0	0
ENSG00000140905	2637	GCSH	2653	0	1	0	1	0	0
ENSG00000140937	1004	CDH11	1009	1	0	0	0	0	0
ENSG00000140939	8888	NOL3	8996	0	0	1	0	0	0
ENSG00000140945	1007	CDH13	1012	1	0	0	0	0	0
ENSG00000141027	9467	NCOR1	9611	1	0	0	0	0	0
ENSG00000141252	34564	VPS53	55275	0	1	1	0	0	0
ENSG00000141378	31131	PTRH2	51651	0	1	0	0	0	0
ENSG00000141385	10781	AFG3L2	10939	0	0	1	0	0	0
ENSG00000141431	56587	ASXL3	80816	1	1	0	0	0	0
ENSG00000141458	4833	NPC1	4864	0	1	1	1	0	0
ENSG00000141485	94182	SLC13A5	284111	0	0	1	0	0	0
ENSG00000141522	393	ARHGDIA	396	0	0	1	0	0	0
ENSG00000141526	9000	SLC16A3	9123	1	0	0	0	0	0
ENSG00000141551	1442	CSNK1D	1453	1	0	0	0	0	0
ENSG00000141556	6864	TBCD	6904	0	0	1	0	0	0
ENSG00000141644	4127	MBD1	4152	1	0	0	0	0	0
ENSG00000141646	4064	SMAD4	4089	1	1	0	0	0	0
ENSG00000141665	83640	FBXO15	201456	1	0	0	0	0	0
ENSG00000141837	157123373	CACNA1A	100507353	1	0	1	0	0	0
ENSG00000141867	23231	BRD4	23476	1	0	0	0	0	0
ENSG00000142156	1282	COL6A1	1291	0	0	0	1	0	0
ENSG00000142168	6607	SOD1	6647	1	0	0	0	1	0
ENSG00000142173	1283	COL6A2	1292	0	0	1	1	0	0
ENSG00000142178	80847	SIK1	150094	1	0	1	0	0	0
ENSG00000142192	348	APP	351	1	0	1	0	1	0
ENSG00000142208	204	AKT1	207	0	1	0	0	0	0
ENSG00000142230	9910	SAE1	10055	1	0	0	0	0	0
ENSG00000142599	470	RERE	473	1	0	0	1	0	0
ENSG00000142655	5163	PEX14	5195	0	1	1	0	0	0
ENSG00000142731	10575	PLK4	10733	0	1	0	0	0	0
ENSG00000142798	3319	HSPG2	3339	0	0	1	0	0	0
ENSG00000142867	8836	BCL10	8915	0	0	1	0	0	0
ENSG00000143183	33790	TMCO1	54499	0	1	0	0	0	0
ENSG00000143207	40927	RFWD2	64326	1	0	0	0	0	0
ENSG00000143224	5466	PPOX	5498	0	1	0	0	0	0
ENSG00000143324	9089	XPR1	9213	0	0	1	0	0	0
ENSG00000143379	9725	SETDB1	9869	1	0	0	0	0	0
ENSG00000143442	22881	POGZ	23126	1	1	1	0	0	0
ENSG00000143473	3731	KCNH1	3756	0	1	1	0	0	0
ENSG00000143549	7127	TPM3	7170	0	0	0	1	0	0
ENSG00000143575	10309	HAX1	10456	0	1	1	0	0	0
ENSG00000143603	3757	KCNN3	3782	0	0	1	0	0	0
ENSG00000143614	36732	GATAD2B	57459	0	1	1	1	0	0
ENSG00000143621	3583	ILF2	3608	1	0	0	0	0	0
ENSG00000143622	5984	RIT1	6016	0	1	0	0	0	0
ENSG00000143631	2296	FLG	2312	0	0	1	0	0	0
ENSG00000143632	55	ACTA1	58	0	0	0	1	0	0
ENSG00000143669	1122	LYST	1130	0	1	0	0	0	0
ENSG00000143756	22974	FBXO28	23219	0	0	1	0	0	0
ENSG00000143801	5632	PSEN2	5664	0	0	1	0	1	0
ENSG00000143815	3905	LBR	3930	0	1	0	0	0	0
ENSG00000143858	79247	SYT2	127833	0	0	1	0	0	0
ENSG00000143919	55626	CAMKMT	79823	0	0	0	1	0	0
ENSG00000143933	801	CALM2	805	0	0	1	0	0	0
ENSG00000144036	22988	EXOC6B	23233	1	0	1	0	0	0
ENSG00000144061	4836	NPHP1	4867	0	0	0	1	0	0
ENSG00000144278	77529	GALNT13	114805	1	0	0	0	0	0
ENSG00000144285	6288	SCN1A	6323	1	1	1	0	0	0
ENSG00000144290	36558	SLC4A10	57282	1	0	1	0	0	0
ENSG00000144331	80949	ZNF385B	151126	1	0	0	0	0	0
ENSG00000144355	1733	DLX1	1745	1	0	0	0	0	0
ENSG00000144381	3309	HSPD1	3329	0	1	0	0	0	0
ENSG00000144406	94487	UNC80	285175	1	0	0	1	0	0
ENSG00000144455	94553	SUMF1	285362	0	1	0	1	0	0
ENSG00000144591	29659	GMPPA	29926	0	1	0	0	0	0
ENSG00000144619	81059	CNTN4	152330	1	0	0	0	0	0
ENSG00000144642	27048	RBMS3	27303	1	0	0	0	0	0
ENSG00000145016	9567	KIAA0226	9711	0	1	0	0	0	0
ENSG00000145020	272	AMT	275	1	1	1	1	0	0
ENSG00000145107	77751	TM4SF19	116211	1	0	0	0	0	0
ENSG00000145217	10703	SLC26A1	10861	0	0	1	0	0	0
ENSG00000145242	2029	EPHA5	2044	0	0	1	0	0	0
ENSG00000145331	60292	RG9MTD2	93587	0	1	0	0	0	0
ENSG00000145337	59182	PIGY	84992	0	0	1	0	0	0
ENSG00000145348	60300	TBCK	93627	0	0	0	1	0	0
ENSG00000145362	284	ANK2	287	1	0	0	0	0	0
ENSG00000145375	81677	SPATA5	166378	0	1	1	0	0	0
ENSG00000145740	41448	SLC30A5	64924	1	0	0	0	0	0
ENSG00000145794	58667	MEGF10	84466	1	0	0	0	0	0
ENSG00000145863	2543	GABRA6	2559	0	0	1	0	0	0
ENSG00000145864	2545	GABRB2	2561	0	0	1	0	0	0
ENSG00000145888	2724	GLRA1	2741	0	0	1	0	0	0
ENSG00000145912	34940	NHP2	55651	0	1	0	0	0	0
ENSG00000145979	30737	TBC1D7	51256	1	1	0	0	0	0
ENSG00000145982	10520	FARS2	10667	0	0	1	0	0	0
ENSG00000146247	34312	PHIP	55023	1	0	0	0	0	0
ENSG00000146282	36316	RARS2	57038	0	1	0	0	0	0
ENSG00000146469	7389	VIP	7432	1	0	0	0	0	0
ENSG00000146477	6544	SLC22A3	6581	1	0	0	0	0	0
ENSG00000146555	85814	SDK1	221935	1	0	0	0	0	0
ENSG00000146733	5691	PSPH	5723	0	1	1	0	0	0
ENSG00000146830	41196	GIGYF1	64599	1	0	0	0	0	0
ENSG00000146872	10853	TLK2	11011	1	0	0	0	0	0
ENSG00000146938	36775	NLGN4X	57502	1	1	0	0	0	0
ENSG00000147010	29744	SH3KBP1	30011	1	0	0	0	0	0
ENSG00000147044	8507	CASK	8573	1	1	1	1	0	0
ENSG00000147050	7360	KDM6A	7403	1	1	1	1	0	0
ENSG00000147065	4452	MSN	4478	1	0	0	0	0	0
ENSG00000147099	35157	HDAC8	55869	1	1	0	0	0	0
ENSG00000147100	6531	SLC16A2	6567	0	1	0	1	0	0
ENSG00000147118	7526	ZNF182	7569	0	0	1	0	0	0
ENSG00000147123	33830	NDUFB11	54539	0	0	1	0	0	0
ENSG00000147133	6832	TAF1	6872	1	0	1	0	0	0
ENSG00000147140	4810	NONO	4841	0	0	1	0	0	0
ENSG00000147155	10535	EBP	10682	0	1	1	1	0	0
ENSG00000147162	8410	OGT	8473	1	0	0	0	0	0
ENSG00000147180	7509	ZNF711	7552	0	1	0	0	0	0
ENSG00000147224	5599	PRPS1	5631	0	1	0	1	0	0
ENSG00000147257	2703	GPC3	2719	0	1	0	0	0	0
ENSG00000147316	55451	MCPH1	79648	1	1	0	0	0	0
ENSG00000147383	30301	NSDHL	50814	0	1	1	0	0	0
ENSG00000147402	35167	GABRQ	55879	1	0	0	0	0	0
ENSG00000147403	6102	RPL10	6134	1	0	1	0	0	0
ENSG00000147475	11001	ERLIN2	11160	0	1	0	0	0	0
ENSG00000147571	1383	CRH	1392	0	0	1	0	0	0
ENSG00000147724	30541	FAM135B	51059	1	0	0	0	0	0
ENSG00000147852	7393	VLDLR	7436	1	1	0	0	0	0
ENSG00000147862	4755	NFIB	4781	1	0	0	0	0	0
ENSG00000147894	83722	C9orf72	203228	0	0	0	0	1	0
ENSG00000148053	4884	NTRK2	4915	1	0	0	0	0	0
ENSG00000148090	546	AUH	549	0	1	1	0	0	0
ENSG00000148143	37313	ZNF462	58499	1	0	0	0	0	0
ENSG00000148180	2917	GSN	2934	1	0	0	0	0	0
ENSG00000148204	94824	CRB2	286204	0	0	1	0	0	0
ENSG00000148219	23000	ASTN2	23245	1	0	0	0	0	0
ENSG00000148290	6794	SURF1	6834	0	0	0	1	0	0
ENSG00000148384	35903	INPP5E	56623	0	1	0	1	0	0
ENSG00000148400	4820	NOTCH1	4851	0	1	1	0	0	0
ENSG00000148408	770	CACNA1B	774	1	0	0	0	0	0
ENSG00000148459	23344	PDSS1	23590	0	1	0	1	0	0
ENSG00000148606	10969	POLR3A	11128	0	1	0	0	0	0
ENSG00000148672	2729	GLUD1	2746	0	1	0	0	0	0
ENSG00000148680	3343	HTR7	3363	1	0	0	0	0	0
ENSG00000148700	117	ADD3	120	0	0	1	0	0	0
ENSG00000148730	1964	EIF4EBP2	1979	1	0	0	0	0	0
ENSG00000148737	6894	TCF7L2	6934	1	0	0	0	0	0
ENSG00000148842	34094	CNNM2	54805	0	1	1	0	0	0
ENSG00000148935	2604	GAS2	2620	1	0	0	0	0	0
ENSG00000148985	27060	PGAP2	27315	0	1	1	0	0	0
ENSG00000149091	8459	DGKZ	8525	1	0	0	0	0	0
ENSG00000149136	6709	SSRP1	6749	1	0	0	0	0	0
ENSG00000149295	1801	DRD2	1813	1	0	0	0	1	0
ENSG00000149311	469	ATM	472	0	1	0	0	0	0
ENSG00000149403	2883	GRIK4	2900	1	0	0	0	0	0
ENSG00000149483	31004	TMEM138	51524	0	0	0	1	0	0
ENSG00000149541	25978	B3GAT3	26229	0	1	0	0	0	0
ENSG00000149571	58822	KIRREL3	84623	1	1	0	0	0	0
ENSG00000149599	79340	DUSP15	128853	1	0	0	0	0	0
ENSG00000149654	41006	CDH22	64405	1	0	0	0	0	0
ENSG00000149930	9209	TAOK2	9344	1	0	0	0	0	0
ENSG00000149970	22622	CNKSR2	22866	1	0	0	0	0	0
ENSG00000149972	33237	CNTN5	53942	1	0	0	0	0	0
ENSG00000150054	80292	MPP7	143098	0	0	1	0	0	0
ENSG00000150086	2887	GRIN2B	2904	1	0	1	1	0	0
ENSG00000150275	41735	PCDH15	65217	1	0	1	0	0	0
ENSG00000150394	1001	CDH8	1006	1	0	0	0	0	0
ENSG00000150672	1728	DLG2	1740	0	0	1	0	0	0
ENSG00000150760	1781	DOCK1	1793	1	0	0	0	0	0
ENSG00000150764	59613	DIXDC1	85458	1	0	0	0	0	0
ENSG00000150768	1725	DLAT	1737	0	1	0	0	0	0
ENSG00000150787	5773	PTS	5805	0	1	0	0	0	0
ENSG00000150893	109954	FREM2	341640	0	1	0	0	0	0
ENSG00000150961	9727	SEC24D	9871	0	0	1	0	0	0
ENSG00000150995	3683	ITPR1	3708	1	1	0	0	0	0
ENSG00000151012	23410	SLC7A11	23657	0	0	1	0	0	0
ENSG00000151067	771	CACNA1C	775	1	0	0	0	1	0
ENSG00000151090	7025	THRB	7068	0	1	1	0	0	0
ENSG00000151092	35057	NGLY1	55768	0	0	1	0	0	0
ENSG00000151148	59821	UBE3B	89910	1	1	0	1	0	0
ENSG00000151150	285	ANK3	288	1	1	1	0	0	0
ENSG00000151240	22737	DIP2C	22982	1	0	1	0	0	0
ENSG00000151247	1962	EIF4E	1977	1	0	0	0	0	0
ENSG00000151327	94030	FAM177A1	283635	0	1	0	0	0	0
ENSG00000151348	2117	EXT2	2132	0	0	1	0	0	0
ENSG00000151422	2226	FER	2241	1	0	0	0	0	0
ENSG00000151461	25768	UPF2	26019	1	0	0	0	0	0
ENSG00000151491	2044	EPS8	2059	1	0	0	0	0	0
ENSG00000151552	5828	QDPR	5860	0	1	1	0	0	0
ENSG00000151611	81684	MMAA	166785	0	1	1	0	0	0
ENSG00000151612	81065	ZNF827	152485	1	0	0	0	0	0
ENSG00000151623	4281	NR3C2	4306	1	0	0	0	0	0
ENSG00000151689	3603	INPP1	3628	1	0	0	0	0	0
ENSG00000151693	8776	ASAP2	8853	1	0	0	0	0	0
ENSG00000151806	38018	GUF1	60558	0	0	1	0	0	0
ENSG00000151835	26026	SACS	26278	0	1	0	0	0	0
ENSG00000151849	35123	CENPJ	55835	0	1	1	0	0	0
ENSG00000151914	663	DST	667	1	0	0	0	0	0
ENSG00000152208	2878	GRID2	2895	1	0	0	0	0	0
ENSG00000152214	5982	RIT2	6014	1	0	0	0	0	0
ENSG00000152217	25789	SETBP1	26040	1	1	1	0	1	0
ENSG00000152223	36997	EPG5	57724	0	0	1	0	0	0
ENSG00000152234	495	ATP5A1	498	0	0	1	0	0	0
ENSG00000152242	80603	C18orf25	147339	0	0	1	0	0	0
ENSG00000152402	2960	GUCY1A2	2977	1	0	0	0	0	0
ENSG00000152413	9319	HOMER1	9456	1	0	0	0	0	0
ENSG00000152495	810	CAMK4	814	1	0	0	0	0	0
ENSG00000152583	8346	SPARCL1	8404	1	0	0	0	0	0
ENSG00000152661	2681	GJA1	2697	0	1	0	0	0	0
ENSG00000152700	30610	SAR1B	51128	0	1	0	0	0	0
ENSG00000152784	36257	PRDM8	56978	0	0	1	0	0	0
ENSG00000152818	7359	UTRN	7402	1	0	0	0	0	0
ENSG00000152822	2894	GRM1	2911	1	0	0	0	0	0
ENSG00000152910	59601	CNTNAP4	85445	1	0	0	0	0	0
ENSG00000152969	81086	JAKMIP1	152789	1	0	0	0	0	0
ENSG00000153187	3172	HNRNPU	3192	1	0	1	0	0	0
ENSG00000153201	5871	RANBP2	5903	0	0	1	0	0	0
ENSG00000153234	4898	NR4A2	4929	1	0	0	0	1	0
ENSG00000153253	6293	SCN3A	6328	0	0	1	0	0	0
ENSG00000153266	34368	FEZF2	55079	1	0	0	0	0	0
ENSG00000153291	9341	SLC25A27	9481	1	0	0	0	0	0
ENSG00000153575	77515	TUBGCP5	114791	1	0	0	0	0	0
ENSG00000153815	56561	CMIP	80790	1	0	0	0	1	0
ENSG00000153827	9186	TRIP12	9320	1	0	0	0	0	0
ENSG00000153922	1097	CHD1	1105	1	0	0	0	0	0
ENSG00000153936	9509	HS2ST1	9653	0	0	1	0	0	0
ENSG00000153956	777	CACNA2D1	781	1	0	1	0	0	0
ENSG00000154122	35455	ANKH	56172	0	0	1	0	0	0
ENSG00000154229	5546	PRKCA	5578	1	0	0	0	0	0
ENSG00000154678	5105	PDE1C	5137	1	0	0	0	0	0
ENSG00000154743	56520	TSEN2	80746	0	0	1	0	0	0
ENSG00000154767	7465	XPC	7508	1	0	0	0	0	0
ENSG00000154803	83614	FLCN	201163	0	0	0	1	0	0
ENSG00000154864	40538	PIEZO2	63895	0	1	0	0	0	0
ENSG00000154957	7523	ZNF18	7566	1	0	0	0	0	0
ENSG00000155052	79385	CNTNAP5	129684	1	0	0	0	0	0
ENSG00000155100	31113	OTUD6B	51633	0	0	0	1	0	0
ENSG00000155465	8936	SLC7A7	9056	1	1	0	1	0	0
ENSG00000155511	2873	GRIA1	2890	1	0	0	0	0	0
ENSG00000155629	78720	PIK3AP1	118788	0	0	1	0	0	0
ENSG00000155659	11161	VSIG4	11326	1	0	0	0	0	0
ENSG00000155755	41586	TMEM237	65062	0	1	0	1	0	0
ENSG00000155816	36055	FMN2	56776	0	1	1	0	0	0
ENSG00000155849	9700	ELMO1	9844	0	0	1	0	0	0
ENSG00000155886	25520	SLC24A2	25769	1	0	0	0	0	0
ENSG00000155906	34294	RMND1	55005	0	0	1	0	0	0
ENSG00000155961	77774	RAB39B	116442	1	1	1	0	0	0
ENSG00000155962	1184	CLIC2	1193	0	1	1	0	0	0
ENSG00000155966	2318	AFF2	2334	1	1	0	0	0	0
ENSG00000155974	23181	GRIP1	23426	1	1	1	0	0	0
ENSG00000155980	3773	KIF5A	3798	0	0	0	1	0	0
ENSG00000156011	23117	PSD3	23362	1	0	0	0	0	0
ENSG00000156049	9486	GNA14	9630	1	0	0	0	0	0
ENSG00000156052	2759	GNAQ	2776	0	0	1	0	0	0
ENSG00000156110	129	ADK	132	1	0	1	0	0	0
ENSG00000156113	3753	KCNMA1	3778	1	0	1	0	0	0
ENSG00000156150	254	ALX3	257	0	1	0	0	0	0
ENSG00000156298	7059	TSPAN7	7102	1	1	1	0	0	0
ENSG00000156471	9647	PTDSS1	9791	0	1	0	0	0	0
ENSG00000156531	58505	PHF6	84295	0	1	1	0	0	0
ENSG00000156564	36770	LRFN2	57497	1	0	0	0	0	0
ENSG00000156650	23277	KAT6B	23522	0	1	0	1	0	0
ENSG00000156709	9008	AIFM1	9131	0	1	1	0	0	0
ENSG00000156876	81613	SASS6	163786	0	1	1	0	0	0
ENSG00000156970	697	BUB1B	701	0	1	0	0	0	0
ENSG00000156973	5115	PDE6D	5147	0	0	0	1	0	0
ENSG00000157087	488	ATP2B2	491	1	0	0	0	0	0
ENSG00000157103	6493	SLC6A1	6529	1	0	1	0	0	0
ENSG00000157152	6814	SYN2	6854	1	0	1	0	0	0
ENSG00000157168	3066	NRG1	3084	1	0	0	0	0	0
ENSG00000157184	1367	CPT2	1376	1	0	1	0	0	0
ENSG00000157379	77713	DHRS1	115817	0	0	0	0	1	0
ENSG00000157388	772	CACNA1D	776	1	0	1	1	0	0
ENSG00000157399	412	ARSE	415	0	1	0	0	0	0
ENSG00000157404	3790	KIT	3815	1	0	0	0	0	0
ENSG00000157423	34057	HYDIN	54768	1	0	0	0	0	0
ENSG00000157445	35088	CACNA2D3	55799	1	0	0	0	0	0
ENSG00000157483	4617	MYO1E	4643	1	0	0	0	0	0
ENSG00000157540	1847	DYRK1A	1859	1	1	1	0	0	0
ENSG00000157542	3738	KCNJ6	3763	0	1	1	0	0	0
ENSG00000157554	2063	ERG	2078	1	0	0	0	0	0
ENSG00000157637	79009	SLC38A10	124565	1	0	0	0	0	0
ENSG00000157741	90159	UBN2	254048	1	0	0	0	0	0
ENSG00000157764	669	BRAF	673	1	1	1	0	1	0
ENSG00000157796	37001	WDR19	57728	0	0	1	0	0	0
ENSG00000157890	58666	MEGF11	84465	1	0	0	0	0	0
ENSG00000157911	5160	PEX10	5192	0	1	0	0	0	0
ENSG00000157933	6461	SKI	6497	0	1	1	0	0	0
ENSG00000157985	78292	AGAP1	116987	1	0	0	0	0	0
ENSG00000158089	55426	GALNT14	79623	1	0	0	0	0	0
ENSG00000158258	40717	CLSTN2	64084	1	0	0	0	0	0
ENSG00000158290	8389	CUL4B	8450	0	1	1	0	0	0
ENSG00000158321	25802	AUTS2	26053	1	1	1	0	0	0
ENSG00000158352	36750	SHROOM4	57477	0	1	1	0	0	0
ENSG00000158445	3720	KCNB1	3745	1	0	1	1	0	0
ENSG00000158458	9401	NRG2	9542	0	0	1	0	0	0
ENSG00000158615	59109	PPP1R15B	84919	0	0	1	0	0	0
ENSG00000158813	1883	EDA	1896	0	1	0	0	0	0
ENSG00000158864	4694	NDUFS2	4720	0	1	0	0	0	0
ENSG00000158887	4333	MPZ	4359	0	0	0	1	0	0
ENSG00000158987	31215	RAPGEF6	51735	0	0	1	0	0	0
ENSG00000159082	8789	SYNJ1	8867	1	0	0	0	0	0
ENSG00000159110	3435	IFNAR2	3455	0	0	1	0	0	0
ENSG00000159140	6611	SON	6651	0	0	1	0	0	0
ENSG00000159164	9756	SV2A	9900	0	0	1	0	0	0
ENSG00000159248	36643	GJD2	57369	0	0	1	0	0	0
ENSG00000159267	3123	HLCS	3141	0	1	0	0	0	0
ENSG00000159307	56075	SCUBE1	80274	0	0	0	0	0	1
ENSG00000159363	23155	ATP13A2	23400	0	1	1	0	0	0
ENSG00000159423	8590	ALDH4A1	8659	0	1	1	0	0	0
ENSG00000159459	83458	UBR1	197131	0	1	0	0	0	0
ENSG00000159640	1624	ACE	1636	1	0	0	0	0	0
ENSG00000159692	1476	CTBP1	1487	0	0	0	1	0	0
ENSG00000159921	9876	GNE	10020	0	0	0	1	0	0
ENSG00000159958	77689	TNFRSF13C	115650	0	0	0	0	0	1
ENSG00000160200	871	CBS	875	1	1	0	0	0	0
ENSG00000160213	1465	CSTB	1476	0	0	1	0	0	0
ENSG00000160282	10683	FTCD	10841	0	1	0	0	0	0
ENSG00000160299	5084	PCNT	5116	0	1	0	0	0	0
ENSG00000160305	22936	DIP2A	23181	1	0	0	0	0	0
ENSG00000160460	37004	SPTBN4	57731	0	0	0	1	0	0
ENSG00000160695	NA	VPS11	NA	0	0	0	1	0	0
ENSG00000160710	100	ADAR	103	0	1	0	0	0	0
ENSG00000160716	1133	CHRNB2	1141	0	0	1	0	0	0
ENSG00000160746	34418	ANO10	55129	0	1	1	0	0	0
ENSG00000160862	560	AZGP1	563	1	0	0	0	0	0
ENSG00000160877	76626	NACC1	112939	1	0	0	0	0	0
ENSG00000160957	NA	RECQL4	NA	0	1	0	0	0	0
ENSG00000161011	8799	SQSTM1	8878	0	0	1	0	0	0
ENSG00000161202	1845	DVL3	1857	1	0	0	0	0	0
ENSG00000161277	83494	THAP8	199745	1	0	0	0	0	0
ENSG00000161395	60267	PGAP3	93210	0	1	1	0	0	0
ENSG00000161533	48	ACOX1	51	0	0	1	0	0	0
ENSG00000161681	30427	SHANK1	50944	1	0	1	0	0	0
ENSG00000162065	36738	TBC1D24	57465	0	1	1	1	0	0
ENSG00000162105	22696	SHANK2	22941	1	0	0	0	0	0
ENSG00000162129	57272	CLPB	81570	0	1	1	1	0	0
ENSG00000162337	4016	LRP5	4041	0	1	0	1	0	0
ENSG00000162415	36916	ZSWIM5	57643	1	0	0	0	0	0
ENSG00000162426	30140	SLC45A1	50651	1	0	0	0	0	0
ENSG00000162599	4748	NFIA	4774	1	1	0	0	0	0
ENSG00000162631	22610	NTNG1	22854	1	0	0	0	0	0
ENSG00000162688	175	AGL	178	0	0	1	0	0	0
ENSG00000162711	77283	NLRP3	114548	0	0	0	0	1	0
ENSG00000162729	60264	IGSF8	93185	0	0	1	0	0	0
ENSG00000162735	5792	PEX19	5824	0	1	1	0	0	0
ENSG00000162769	28718	FLVCR1	28982	0	1	0	0	0	0
ENSG00000162923	56033	WDR26	80232	1	0	0	0	0	0
ENSG00000162928	5162	PEX13	5194	0	1	1	0	0	0
ENSG00000162946	26930	DISC1	27185	1	0	0	0	0	0
ENSG00000163093	79397	BBS5	129880	0	1	0	0	0	0
ENSG00000163156	54845	SCNM1	79005	0	0	1	0	0	0
ENSG00000163161	2056	ERCC3	2071	0	1	0	0	0	0
ENSG00000163288	2544	GABRB1	2560	1	0	1	0	0	0
ENSG00000163359	1284	COL6A3	1293	0	0	1	1	0	0
ENSG00000163393	34645	SLC22A15	55356	1	0	0	0	0	0
ENSG00000163399	473	ATP1A1	476	1	0	0	0	0	0
ENSG00000163421	38106	PROK2	60675	0	0	1	0	0	0
ENSG00000163486	23135	SRGAP2	23380	0	0	1	0	0	0
ENSG00000163513	7006	TGFBR2	7048	0	1	0	0	0	0
ENSG00000163527	83650	STT3B	201595	0	1	1	0	0	0
ENSG00000163536	5242	SERPINI1	5274	0	0	1	0	0	0
ENSG00000163541	8725	SUCLG1	8802	0	1	0	1	0	0
ENSG00000163618	8549	CADPS	8618	1	0	0	0	0	0
ENSG00000163625	22756	WDFY3	23001	1	0	0	0	0	0
ENSG00000163635	6280	ATXN7	6314	1	0	0	1	0	0
ENSG00000163637	81675	PRICKLE2	166336	1	0	1	0	0	0
ENSG00000163872	34978	YEATS2	55689	1	0	0	0	0	0
ENSG00000163873	2882	GRIK3	2899	1	0	0	0	0	0
ENSG00000163877	55556	SNIP1	79753	0	1	1	0	0	0
ENSG00000163933	60111	RFT1	91869	0	1	1	0	0	0
ENSG00000164022	9128	AIMP1	9255	0	1	1	0	0	0
ENSG00000164032	2998	H2AFZ	3015	1	0	0	0	0	0
ENSG00000164050	5332	PLXNB1	5364	1	0	0	0	0	0
ENSG00000164061	8848	BSN	8927	0	0	1	0	0	0
ENSG00000164087	25635	POC1A	25886	0	1	0	0	0	0
ENSG00000164099	8426	PRSS12	8492	0	1	0	0	0	0
ENSG00000164116	2965	GUCY1A3	2982	0	0	1	0	0	0
ENSG00000164134	55956	NAA15	80155	1	0	0	0	0	0
ENSG00000164172	4312	MOCS2	4338	0	0	1	0	0	0
ENSG00000164182	60119	NDUFAF2	91942	0	1	0	0	0	0
ENSG00000164190	25585	NIPBL	25836	1	1	0	0	0	0
ENSG00000164199	58270	GPR98	84059	0	0	1	0	0	0
ENSG00000164258	4698	NDUFS4	4724	0	1	0	0	0	0
ENSG00000164405	26834	UQCRQ	27089	0	1	0	0	0	0
ENSG00000164418	2881	GRIK2	2898	1	1	1	0	0	0
ENSG00000164434	2158	FABP7	2173	1	0	0	0	0	0
ENSG00000164494	36385	PDSS2	57107	0	1	1	1	0	0
ENSG00000164506	79620	STXBP5	134957	1	0	0	0	0	0
ENSG00000164588	110417	HCN1	348980	1	1	1	0	0	0
ENSG00000164604	33620	GPR85	54329	1	0	0	0	0	0
ENSG00000164631	7516	ZNF12	7559	0	0	1	0	0	0
ENSG00000164638	85880	SLC29A4	222962	1	0	0	0	0	0
ENSG00000164687	2156	FABP5	2171	1	0	0	0	0	0
ENSG00000164690	6433	SHH	6469	0	1	0	0	0	0
ENSG00000164751	5796	PEX2	5828	0	1	1	0	0	0
ENSG00000164754	5853	RAD21	5885	1	1	0	0	0	0
ENSG00000164778	2005	EN2	2020	1	0	0	0	0	0
ENSG00000164867	4815	NOS3	4846	0	0	0	0	1	0
ENSG00000164880	25922	INTS1	26173	1	0	0	0	0	0
ENSG00000164885	1015	CDK5	1020	0	0	1	0	0	0
ENSG00000164898	81203	C7orf55	154791	0	0	1	0	0	0
ENSG00000164904	498	ALDH7A1	501	0	1	1	0	0	0
ENSG00000164951	33993	PDP1	54704	0	1	0	0	0	0
ENSG00000164953	60008	TMEM67	91147	0	1	0	1	0	0
ENSG00000165102	79726	HGSNAT	138050	0	1	1	0	0	0
ENSG00000165186	79807	PTCHD1	139411	1	0	0	0	0	0
ENSG00000165194	36799	PCDH19	57526	1	1	1	0	1	0
ENSG00000165195	5245	PIGA	5277	0	0	1	1	0	0
ENSG00000165240	535	ATP7A	538	0	1	1	0	0	0
ENSG00000165246	22585	NLGN4Y	22829	1	0	0	0	0	0
ENSG00000165282	58916	PIGO	84720	0	1	1	0	0	0
ENSG00000165288	90163	BRWD3	254065	0	1	1	0	0	0
ENSG00000165300	25799	SLITRK5	26050	1	0	0	0	0	0
ENSG00000165349	59079	SLC7A3	84889	1	0	0	0	0	0
ENSG00000165355	90175	FBXO33	254170	1	0	0	0	0	0
ENSG00000165379	80448	LRFN5	145581	1	0	1	0	0	0
ENSG00000165410	1065	CFL2	1073	0	0	0	1	0	0
ENSG00000165474	2690	GJB2	2706	0	0	0	0	1	0
ENSG00000165476	85696	REEP3	221035	1	0	0	0	0	0
ENSG00000165478	85636	HEPACAM	220296	1	1	0	1	0	0
ENSG00000165533	78936	TTC8	123016	0	1	0	0	0	0
ENSG00000165588	4983	OTX2	5015	0	0	1	0	0	0
ENSG00000165671	40925	NSD1	64324	1	1	1	1	0	0
ENSG00000165699	7205	TSC1	7248	1	1	1	0	0	0
ENSG00000165704	3231	HPRT1	3251	0	1	0	1	0	0
ENSG00000165973	4719	NELL1	4745	1	0	1	0	0	0
ENSG00000165995	779	CACNB2	783	1	0	0	0	0	0
ENSG00000166068	81523	SPRED1	161742	0	1	0	0	0	0
ENSG00000166086	57942	JAM3	83700	0	1	1	0	0	0
ENSG00000166123	58902	GPT2	84706	0	1	1	0	0	0
ENSG00000166147	2185	FBN1	2200	1	1	0	0	0	0
ENSG00000166148	549	AVPR1A	552	1	0	0	0	1	0
ENSG00000166206	2546	GABRB3	2562	1	0	1	0	0	0
ENSG00000166311	6569	SMPD1	6609	0	1	0	0	0	0
ENSG00000166313	319	APBB1	322	1	0	0	0	0	0
ENSG00000166340	1191	TPP1	1200	0	1	0	0	0	0
ENSG00000166341	8573	DCHS1	8642	0	1	0	0	0	0
ENSG00000166444	6724	ST5	6764	0	0	1	0	0	0
ENSG00000166477	78942	LEO1	123169	1	0	0	0	0	0
ENSG00000166478	7658	ZNF143	7702	0	0	0	1	0	0
ENSG00000166501	5547	PRKCB	5579	1	0	0	0	0	0
ENSG00000166548	7041	TK2	7084	0	0	1	1	0	0
ENSG00000166603	4135	MC4R	4160	1	0	0	0	0	0
ENSG00000166681	26763	NGFRAP1	27018	0	0	1	0	0	0
ENSG00000166734	76649	CASC4	113201	1	0	0	0	0	0
ENSG00000166801	40544	FAM111A	63901	0	0	1	0	0	0
ENSG00000166813	119491	KIF7	374654	0	1	0	1	0	0
ENSG00000166833	59736	NAV2	89797	1	0	0	0	0	0
ENSG00000166847	58717	DCTN5	84516	1	0	0	0	0	0
ENSG00000166862	10222	CACNG2	10369	0	0	1	0	0	0
ENSG00000166974	10824	MAPRE2	10982	0	0	1	0	0	0
ENSG00000166987	77509	MBD6	114785	1	0	0	0	0	0
ENSG00000167074	6966	TEF	7008	0	0	0	0	0	1
ENSG00000167085	5213	PHB	5245	1	0	0	0	0	0
ENSG00000167113	30599	COQ4	51117	0	0	1	1	0	0
ENSG00000167114	10841	SLC27A4	10999	1	0	0	0	0	0
ENSG00000167186	10083	COQ7	10229	0	0	0	1	0	0
ENSG00000167216	57717	KATNAL2	83473	1	0	0	0	0	0
ENSG00000167281	80543	RBFOX3	146713	0	0	1	0	0	0
ENSG00000167323	6746	STIM1	6786	0	0	0	1	0	0
ENSG00000167371	76591	PRRT2	112476	0	0	1	0	0	0
ENSG00000167468	2862	GPX4	2879	0	0	1	0	0	0
ENSG00000167513	57302	CDT1	81620	0	1	0	0	0	0
ENSG00000167522	28858	ANKRD11	29123	1	1	0	0	0	0
ENSG00000167548	8034	MLL2	8085	0	1	0	0	0	0
ENSG00000167552	7800	TUBA1A	7846	0	1	1	0	0	0
ENSG00000167566	36974	NCKAP5L	57701	1	0	0	0	0	0
ENSG00000167632	57938	TRAPPC9	83696	1	1	1	1	0	0
ENSG00000167716	79049	WDR81	124997	0	1	0	0	0	0
ENSG00000167792	4697	NDUFV1	4723	0	1	0	0	0	0
ENSG00000168000	26327	BSCL2	26580	0	1	1	0	0	0
ENSG00000168014	25754	C2CD3	26005	0	1	0	0	0	0
ENSG00000168036	1488	CTNNB1	1499	1	1	0	0	0	0
ENSG00000168040	8697	FADD	8772	0	0	1	0	0	0
ENSG00000168116	36964	KIAA1586	57691	1	0	0	0	0	0
ENSG00000168137	34498	SETD5	55209	1	1	1	0	0	0
ENSG00000168214	3495	RBPJ	3516	0	1	1	0	0	0
ENSG00000168216	35077	LMBRD1	55788	0	0	0	1	0	0
ENSG00000168237	79502	GLYCTK	132158	0	1	1	0	0	0
ENSG00000168280	3775	KIF5C	3800	1	1	1	0	0	0
ENSG00000168282	4222	MGAT2	4247	0	1	0	0	0	0
ENSG00000168286	36491	THAP11	57215	0	0	0	1	0	0
ENSG00000168288	26994	MMADHC	27249	0	1	1	1	0	0
ENSG00000168303	79682	C7orf11	136647	0	1	0	0	0	0
ENSG00000168329	1513	CX3CR1	1524	1	0	0	0	0	0
ENSG00000168389	59069	MFSD2A	84879	0	0	1	0	0	0
ENSG00000168394	6850	TAP1	6890	0	0	1	0	0	0
ENSG00000168434	60122	COG7	91949	0	0	1	0	0	0
ENSG00000168538	38115	C4orf41	60684	0	1	0	0	0	0
ENSG00000168575	6539	SLC20A2	6575	0	0	1	0	0	0
ENSG00000168769	34079	TET2	54790	1	0	0	0	0	0
ENSG00000168778	55670	TCTN2	79867	0	0	0	1	0	0
ENSG00000168827	59624	GFM1	85476	0	0	1	0	0	0
ENSG00000168843	36163	FSTL5	56884	0	0	1	0	0	0
ENSG00000168884	54994	TNIP2	79155	1	0	0	0	0	0
ENSG00000168924	3929	LETM1	3954	0	0	0	1	0	0
ENSG00000168944	81110	CEP120	153241	0	0	0	1	0	0
ENSG00000168959	2898	GRM5	2915	1	0	0	0	0	0
ENSG00000168993	10657	CPLX1	10815	0	0	0	1	0	0
ENSG00000169032	5572	MAP2K1	5604	0	1	0	0	0	0
ENSG00000169045	3167	HNRNPH1	3187	0	0	1	0	0	0
ENSG00000169057	4179	MECP2	4204	1	1	1	1	1	0
ENSG00000169071	4889	ROR2	4920	0	1	0	0	0	0
ENSG00000169083	364	AR	367	1	0	0	0	0	0
ENSG00000169118	33239	CSNK1G1	53944	0	0	1	0	0	0
ENSG00000169252	151	ADRB2	154	1	0	0	0	0	0
ENSG00000169282	7835	KCNAB1	7881	0	0	1	0	0	0
ENSG00000169306	10982	IL1RAPL1	11141	1	1	1	0	0	0
ENSG00000169359	9073	SLC33A1	9197	1	1	1	0	0	0
ENSG00000169372	8667	CRADD	8738	0	1	0	0	0	0
ENSG00000169375	25691	SIN3A	25942	1	0	0	0	0	0
ENSG00000169379	83598	ARL13B	200894	0	1	0	1	0	0
ENSG00000169427	30786	KCNK9	51305	0	1	0	1	0	0
ENSG00000169432	6300	SCN9A	6335	1	0	1	0	0	0
ENSG00000169439	6347	SDC2	6383	1	0	0	0	0	0
ENSG00000169554	9695	ZEB2	9839	0	1	1	0	1	0
ENSG00000169562	2689	GJB1	2705	0	1	0	0	0	0
ENSG00000169607	80894	CKAP2L	150468	0	1	0	0	0	0
ENSG00000169692	10408	AGPAT2	10555	0	1	0	0	0	0
ENSG00000169710	2179	FASN	2194	0	0	1	0	0	0
ENSG00000169760	22627	NLGN1	22871	1	0	1	0	0	0
ENSG00000169814	682	BTD	686	0	1	0	1	0	0
ENSG00000169851	5067	PCDH7	5099	0	0	1	0	0	0
ENSG00000169855	6059	ROBO1	6091	1	0	0	0	0	0
ENSG00000169862	1490	CTNND2	1501	1	0	1	0	0	0
ENSG00000169895	60703	SYAP1	94056	1	0	0	0	0	0
ENSG00000169918	81521	OTUD7A	161725	1	0	0	0	0	0
ENSG00000169919	2973	GUSB	2990	0	1	0	0	0	0
ENSG00000169926	31101	KLF13	51621	0	0	1	0	0	0
ENSG00000169933	9614	FRMPD4	9758	1	0	0	0	0	0
ENSG00000169992	36828	NLGN2	57555	1	0	0	0	0	0
ENSG00000170004	1099	CHD3	1107	1	0	1	0	0	0
ENSG00000170113	78953	NIPA1	123606	1	0	1	0	0	0
ENSG00000170262	35526	MRAP	56246	0	0	1	0	0	0
ENSG00000170266	2704	GLB1	2720	0	1	0	0	0	0
ENSG00000170370	2003	EMX2	2018	0	0	1	0	0	0
ENSG00000170381	9579	SEMA3E	9723	0	1	0	0	0	0
ENSG00000170396	60094	ZNF804A	91752	1	0	0	0	0	0
ENSG00000170448	81067	NFXL1	152518	0	0	0	0	1	0
ENSG00000170471	36424	RALGAPB	57148	1	0	0	0	0	0
ENSG00000170485	4831	NPAS2	4862	1	0	0	0	0	0
ENSG00000170579	9104	DLGAP1	9229	1	0	0	0	0	0
ENSG00000170581	6733	STAT2	6773	0	0	1	0	0	0
ENSG00000170584	79605	NUDCD2	134492	1	0	0	0	0	0
ENSG00000170638	56106	TRABD	80305	0	0	0	0	0	1
ENSG00000170745	3765	KCNS3	3790	1	0	0	0	0	0
ENSG00000170775	2844	GPR37	2861	1	0	0	0	0	0
ENSG00000170836	8427	PPM1D	8493	1	0	0	0	0	0
ENSG00000170921	25864	TANC2	26115	1	0	0	0	0	0
ENSG00000171045	83709	TSNARE1	203062	0	0	1	0	0	0
ENSG00000171100	4508	MTM1	4534	0	0	0	1	0	0
ENSG00000171105	3618	INSR	3643	0	0	1	1	0	0
ENSG00000171121	26839	KCNMB3	27094	0	0	1	0	0	0
ENSG00000171189	2880	GRIK1	2897	0	0	1	0	0	0
ENSG00000171206	57285	TRIM8	81603	0	0	1	0	0	0
ENSG00000171298	2532	GAA	2548	0	0	0	1	0	0
ENSG00000171302	79010	CANT1	124583	0	1	0	0	0	0
ENSG00000171316	34925	CHD7	55636	1	1	0	0	0	0
ENSG00000171320	81296	ESCO2	157570	0	1	0	0	0	0
ENSG00000171385	3727	KCND3	3752	1	0	1	0	0	0
ENSG00000171444	4138	MCC	4163	1	0	0	0	0	0
ENSG00000171456	82226	ASXL1	171023	0	1	1	0	0	0
ENSG00000171587	1814	DSCAM	1826	1	0	0	0	0	0
ENSG00000171603	22639	CLSTN1	22883	0	0	1	0	0	0
ENSG00000171720	8764	HDAC3	8841	1	0	0	0	0	0
ENSG00000171723	10097	GPHN	10243	1	0	1	0	0	0
ENSG00000171735	23016	CAMTA1	23261	1	1	1	0	0	0
ENSG00000171759	5021	PAH	5053	1	1	0	0	0	0
ENSG00000171766	2612	GATM	2628	1	1	0	0	1	0
ENSG00000171791	593	BCL2	596	1	0	0	0	1	0
ENSG00000171843	4275	MLLT3	4300	0	0	1	0	0	0
ENSG00000171862	5696	PTEN	5728	1	1	1	0	1	0
ENSG00000171867	5589	PRNP	5621	0	0	1	0	0	0
ENSG00000171885	358	AQP4	361	0	0	0	0	1	0
ENSG00000171988	85697	JMJD1C	221037	1	0	0	0	0	0
ENSG00000172005	4093	MAL	4118	1	0	0	0	0	0
ENSG00000172020	2580	GAP43	2596	1	0	0	0	0	0
ENSG00000172053	5827	QARS	5859	0	0	1	0	0	0
ENSG00000172071	9314	EIF2AK3	9451	0	1	0	0	0	0
ENSG00000172250	60657	SERHL	94009	0	0	0	0	0	1
ENSG00000172260	90401	NEGR1	257194	1	0	0	0	0	0
ENSG00000172264	80085	MACROD2	140733	1	0	0	0	0	0
ENSG00000172269	1786	DPAGT1	1798	0	1	1	0	0	0
ENSG00000172340	8724	SUCLG2	8801	1	0	0	0	0	0
ENSG00000172346	26999	CSDC2	27254	0	0	0	0	0	1
ENSG00000172349	3578	IL16	3603	1	0	0	0	0	0
ENSG00000172379	9771	ARNT2	9915	1	0	1	0	0	0
ENSG00000172404	80878	DNAJB7	150353	0	0	0	0	0	1
ENSG00000172409	10820	CLP1	10978	0	0	1	0	0	0
ENSG00000172534	3037	HCFC1	3054	1	1	1	1	0	0
ENSG00000172554	33513	SNTG2	54221	1	0	0	0	0	0
ENSG00000172780	109617	RAB43	339122	1	0	0	0	0	0
ENSG00000172893	1705	DHCR7	1717	1	1	0	0	0	0
ENSG00000172915	26705	NBEA	26960	1	0	0	0	0	0
ENSG00000172922	58364	RNASEH2C	84153	0	1	0	0	0	0
ENSG00000172943	22888	PHF8	23133	1	1	1	0	0	0
ENSG00000173085	26980	COQ2	27235	0	1	1	1	0	0
ENSG00000173175	108	ADCY5	111	1	0	0	1	0	0
ENSG00000173338	9944	KCNK7	10089	1	0	0	0	0	0
ENSG00000173402	1593	DAG1	1605	0	1	0	0	0	0
ENSG00000173406	1588	DAB1	1600	1	0	0	0	0	0
ENSG00000173409	41374	ARV1	64801	0	0	1	0	0	0
ENSG00000173540	29658	GMPPB	29925	0	1	1	0	0	0
ENSG00000173575	157123203	CHD2	100507217	1	1	1	1	0	0
ENSG00000173599	5059	PC	5091	0	1	1	0	0	0
ENSG00000173706	36766	HEG1	57493	0	0	1	0	0	0
ENSG00000173726	9660	TOMM20	9804	1	0	0	0	0	0
ENSG00000173821	36947	RNF213	57674	0	0	1	0	0	0
ENSG00000174093	133604	RP11-1407O15.2	440434	1	0	0	0	0	0
ENSG00000174227	34161	PIGG	54872	0	0	1	1	0	0
ENSG00000174405	3956	LIG4	3981	0	1	0	0	0	0
ENSG00000174437	485	ATP2A2	488	0	1	0	0	0	0
ENSG00000174442	34344	ZWILCH	55055	1	0	0	0	0	0
ENSG00000174469	25796	CNTNAP2	26047	1	1	1	0	1	0
ENSG00000174483	579	BBS1	582	0	1	0	0	0	0
ENSG00000174684	10883	B3GNT1	11041	0	0	1	0	0	0
ENSG00000174720	31054	LARP7	51574	0	1	0	0	0	0
ENSG00000174721	80303	FGFBP3	143282	1	0	0	0	0	0
ENSG00000174775	3245	HRAS	3265	1	1	0	1	0	0
ENSG00000174799	9518	CEP135	9662	1	1	0	0	0	0
ENSG00000174938	26218	SEZ6L2	26470	1	0	0	0	0	0
ENSG00000174943	90150	KCTD13	253980	1	0	0	0	0	0
ENSG00000174996	41400	KLC2	64837	1	0	0	0	0	0
ENSG00000175054	542	ATR	545	0	1	0	0	0	0
ENSG00000175110	36224	MRPS22	56945	0	0	1	0	0	0
ENSG00000175115	34979	PACS1	55690	1	1	0	0	0	0
ENSG00000175161	90115	CADM2	253559	1	0	0	0	0	0
ENSG00000175198	5063	PCCA	5095	1	0	0	1	0	0
ENSG00000175283	22601	DOLK	22845	1	0	1	0	0	0
ENSG00000175445	3998	LPL	4023	1	0	0	0	0	0
ENSG00000175497	36901	DPP10	57628	1	0	0	0	0	0
ENSG00000175606	34257	TMEM70	54968	0	0	0	1	0	0
ENSG00000175745	6983	NR2F1	7025	1	1	1	0	0	0
ENSG00000175866	10311	BAIAP2	10458	1	0	0	0	0	0
ENSG00000176165	2274	FOXG1	2290	1	1	1	0	1	0
ENSG00000176225	25663	RTTN	25914	0	1	1	0	0	0
ENSG00000176340	1342	COX8A	1351	0	1	0	1	0	0
ENSG00000176619	59014	LMNB2	84823	0	0	1	0	0	0
ENSG00000176697	624	BDNF	627	1	0	1	0	1	0
ENSG00000176715	83470	ACSF3	197322	0	1	1	0	0	0
ENSG00000176771	110103	NCKAP5	344148	1	0	1	0	0	0
ENSG00000176884	2885	GRIN1	2902	1	1	1	0	0	0
ENSG00000176887	6624	SOX11	6664	0	1	0	0	0	0
ENSG00000176915	22896	ANKLE2	23141	0	0	1	0	0	0
ENSG00000177000	4498	MTHFR	4524	1	0	1	0	0	0
ENSG00000177030	10375	DEAF1	10522	1	1	1	0	0	0
ENSG00000177082	59132	WDR73	84942	0	1	1	0	0	0
ENSG00000177096	80881	FAM109B	150368	0	0	0	0	0	1
ENSG00000177189	6164	RPS6KA3	6197	1	1	0	0	0	0
ENSG00000177192	56125	PUS1	80324	0	1	0	0	0	0
ENSG00000177239	11092	MAN1B1	11253	0	1	1	1	0	0
ENSG00000177301	3712	KCNA2	3737	0	0	1	0	0	0
ENSG00000177426	7008	TGIF1	7050	0	1	0	0	0	0
ENSG00000177542	55554	SLC25A22	79751	0	1	1	0	0	0
ENSG00000177565	55521	TBL1XR1	79718	1	1	1	1	0	0
ENSG00000177663	23518	IL17RA	23765	1	0	0	0	0	0
ENSG00000177791	37343	MYOZ1	58529	1	0	0	0	0	0
ENSG00000177807	3741	KCNJ10	3766	1	1	0	0	0	0
ENSG00000177989	133981	ODF3B	440836	0	0	0	0	0	1
ENSG00000178394	3330	HTR1A	3350	0	0	1	0	0	0
ENSG00000178445	2714	GLDC	2731	0	1	1	1	0	0
ENSG00000178449	59177	C12orf62	84987	0	1	0	0	0	0
ENSG00000178537	784	SLC25A20	788	0	0	1	0	0	0
ENSG00000178538	763	CA8	767	0	1	0	0	0	0
ENSG00000178568	2051	ERBB4	2066	1	0	1	0	0	0
ENSG00000178573	4069	MAF	4094	0	1	1	0	0	0
ENSG00000178665	110420	ZNF713	349075	1	0	0	0	0	0
ENSG00000178718	34202	RPP25	54913	1	0	0	0	0	0
ENSG00000178719	2890	GRINA	2907	0	0	1	0	0	0
ENSG00000178814	NA	OPLAH	NA	0	0	1	0	0	0
ENSG00000178826	79655	TMEM139	135932	0	0	1	0	0	0
ENSG00000178860	9116	MSC	9242	0	0	1	0	0	0
ENSG00000178971	55970	CTC1	80169	0	0	1	0	0	0
ENSG00000179094	5155	PER1	5187	1	0	0	0	0	0
ENSG00000179151	55954	EDC3	80153	0	1	0	0	0	0
ENSG00000179163	2501	FUCA1	2517	0	1	0	0	0	0
ENSG00000179222	9359	MAGED1	9500	1	0	0	0	0	0
ENSG00000179295	5749	PTPN11	5781	1	1	0	0	1	0
ENSG00000179364	22996	PACS2	23241	1	0	0	0	0	0
ENSG00000179455	7637	MKRN3	7681	0	0	0	1	1	0
ENSG00000179456	10325	ZNF238	10472	0	1	0	0	0	0
ENSG00000179603	2901	GRM8	2918	1	0	0	0	0	0
ENSG00000179915	9243	NRXN1	9378	1	1	1	1	0	0
ENSG00000179941	55541	BBS10	79738	0	1	0	0	0	0
ENSG00000179950	22583	PUF60	22827	0	1	1	0	0	0
ENSG00000180104	11171	EXOC3	11336	1	0	0	0	0	0
ENSG00000180269	78987	GPR139	124274	1	0	0	0	0	0
ENSG00000180370	5030	PAK2	5062	1	0	0	0	0	0
ENSG00000180879	6708	SSR4	6748	0	0	1	0	0	0
ENSG00000180902	172103	D2HGDH	728294	0	1	1	1	0	0
ENSG00000180914	4989	OXTR	5021	1	0	0	0	0	0
ENSG00000181004	81678	BBS12	166379	0	1	0	0	0	0
ENSG00000181027	54986	FKRP	79147	0	1	0	0	0	0
ENSG00000181038	79004	METTL23	124512	0	1	1	0	0	0
ENSG00000181090	55616	EHMT1	79813	1	1	1	1	0	0
ENSG00000181192	34815	DHTKD1	55526	0	1	1	0	0	0
ENSG00000181449	6617	SOX2	6657	0	1	1	0	0	0
ENSG00000181481	58492	RNF135	84282	1	0	0	0	0	0
ENSG00000181523	6412	SGSH	6448	1	1	0	0	0	0
ENSG00000181555	28808	SETD2	29072	1	0	1	0	0	0
ENSG00000181722	25886	ZBTB20	26137	1	1	0	0	0	0
ENSG00000181744	83779	C3orf58	205428	1	0	0	0	0	0
ENSG00000181804	94500	SLC9A9	285195	1	1	1	0	0	0
ENSG00000181830	34632	SLC35C1	55343	0	1	0	0	0	0
ENSG00000182054	3398	IDH2	3418	0	0	1	0	0	0
ENSG00000182117	34794	NOP10	55505	0	1	0	0	0	0
ENSG00000182173	94135	TSEN54	283989	0	1	1	0	0	0
ENSG00000182197	2116	EXT1	2131	1	0	0	0	0	0
ENSG00000182220	10014	ATP6AP2	10159	0	1	1	0	0	0
ENSG00000182256	2551	GABRG3	2567	1	0	0	0	0	0
ENSG00000182287	8826	AP1S2	8905	1	1	1	0	0	0
ENSG00000182372	2040	CLN8	2055	1	1	0	0	0	0
ENSG00000182389	781	CACNB4	785	0	0	1	0	0	0
ENSG00000182400	78897	TRAPPC6B	122553	1	0	0	0	0	0
ENSG00000182472	80666	CAPN12	147968	1	0	0	0	0	0
ENSG00000182500	59066	ORAI1	84876	0	0	1	0	0	0
ENSG00000182578	1425	CSF1R	1436	0	0	1	0	0	0
ENSG00000182621	22991	PLCB1	23236	1	1	1	0	0	0
ENSG00000182636	4666	NDN	4692	0	0	1	1	1	0
ENSG00000182771	2877	GRID1	2894	1	0	0	0	0	0
ENSG00000182841	60086	RRP7B	91695	0	0	0	0	0	1
ENSG00000182858	54926	ALG12	79087	0	1	1	0	0	1
ENSG00000182871	56555	COL18A1	80781	0	0	1	0	0	0
ENSG00000182872	8189	RBM10	8241	0	1	1	0	0	0
ENSG00000182901	5968	RGS7	6000	1	0	0	0	0	0
ENSG00000182985	23458	CADM1	23705	1	0	0	0	0	0
ENSG00000183010	5799	PYCR1	5831	0	1	0	0	0	0
ENSG00000183023	6510	SLC8A1	6546	0	0	1	0	0	0
ENSG00000183044	15	ABAT	18	1	0	1	1	0	0
ENSG00000183098	9937	GPC6	10082	1	1	0	0	0	0
ENSG00000183117	41076	CSMD1	64478	1	0	0	0	0	0
ENSG00000183166	57940	CALN1	83698	0	0	1	0	0	0
ENSG00000183172	60084	C22orf32	91689	0	0	0	0	0	1
ENSG00000183230	28855	CTNNA3	29119	1	0	0	0	0	0
ENSG00000183287	80606	CCBE1	147372	0	1	0	0	0	0
ENSG00000183337	34169	BCOR	54880	0	1	0	0	0	0
ENSG00000183454	2886	GRIN2A	2903	1	1	1	0	0	0
ENSG00000183495	36907	EP400	57634	1	0	0	0	0	0
ENSG00000183569	90093	SERHL2	253190	0	0	0	0	0	1
ENSG00000183605	78750	SFXN4	119559	0	1	0	0	0	0
ENSG00000183785	31287	TUBA8	51807	0	1	1	0	0	0
ENSG00000183856	79266	IQGAP3	128239	1	0	0	0	0	0
ENSG00000183864	10608	TOB2	10766	0	0	0	0	0	1
ENSG00000183873	6296	SCN5A	6331	1	0	1	0	0	0
ENSG00000183943	5581	PRKX	5613	0	0	1	0	0	0
ENSG00000183978	28694	CCDC56	28958	0	1	0	0	0	0
ENSG00000184009	68	ACTG1	71	0	1	1	0	0	0
ENSG00000184068	NA	RP5-821D11.7	NA	0	0	0	0	0	1
ENSG00000184144	6860	CNTN2	6900	0	0	1	0	0	0
ENSG00000184156	3761	KCNQ3	3786	1	0	1	0	0	0
ENSG00000184164	55013	CRELD2	79174	0	0	0	0	0	1
ENSG00000184178	81072	SCFD2	152579	1	0	0	0	0	0
ENSG00000184185	3743	KCNJ12	3768	1	0	0	0	0	0
ENSG00000184208	55443	C22orf46	79640	0	0	0	0	0	1
ENSG00000184226	5069	PCDH9	5101	1	0	0	0	0	0
ENSG00000184254	217	ALDH1A3	220	1	0	0	0	0	0
ENSG00000184304	5555	PRKD1	5587	1	0	0	0	0	0
ENSG00000184319	NA	AC002055.4	NA	0	0	0	0	0	1
ENSG00000184347	6549	SLIT3	6586	1	0	0	0	0	0
ENSG00000184381	8340	PLA2G6	8398	0	1	0	1	0	0
ENSG00000184408	3726	KCND2	3751	1	0	1	0	0	0
ENSG00000184486	5422	POU3F2	5454	1	0	0	0	0	0
ENSG00000184500	5595	PROS1	5627	0	0	1	0	0	0
ENSG00000184588	5110	PDE4B	5142	1	0	0	0	0	0
ENSG00000184634	9824	MED12	9968	1	1	1	1	0	0
ENSG00000184845	1800	DRD1	1812	1	0	0	0	0	0
ENSG00000184886	94175	PIGW	284098	0	0	1	0	0	0
ENSG00000184903	58160	IMMP2L	83943	1	0	0	0	0	0
ENSG00000184983	4674	NDUFA6	4700	0	0	0	0	0	1
ENSG00000185008	6060	ROBO2	6092	1	0	0	0	0	0
ENSG00000185024	2955	BRF1	2972	0	1	0	0	0	0
ENSG00000185046	36178	ANKS1B	56899	1	0	0	0	0	0
ENSG00000185129	5781	PURA	5813	0	1	1	1	0	0
ENSG00000185246	34304	PRPF39	55015	1	0	0	0	0	0
ENSG00000185339	6908	TCN2	6948	0	1	0	0	0	0
ENSG00000185344	23299	ATP6V0A2	23545	1	1	1	0	0	0
ENSG00000185345	5039	PARK2	5071	0	0	1	0	1	0
ENSG00000185386	5568	MAPK11	5600	0	0	0	0	0	1
ENSG00000185630	5055	PBX1	5087	1	0	0	0	0	0
ENSG00000185666	8172	SYN3	8224	1	0	0	0	0	0
ENSG00000185737	10560	NRG3	10718	0	0	1	0	0	0
ENSG00000185818	109778	NAT8L	339983	0	0	1	0	0	0
ENSG00000185825	9989	BCAP31	10134	0	1	1	0	0	0
ENSG00000185838	33875	GNB1L	54584	1	0	0	0	0	0
ENSG00000185883	524	ATP6V0C	527	0	0	1	0	0	0
ENSG00000185920	5695	PTCH1	5727	0	1	1	0	0	0
ENSG00000185942	94817	NKAIN3	286183	0	0	1	0	0	0
ENSG00000185973	34506	TMLHE	55217	1	1	1	0	0	0
ENSG00000186094	59061	AGBL4	84871	1	0	0	0	0	0
ENSG00000186153	31221	WWOX	51741	1	1	1	0	0	0
ENSG00000186260	36769	MKL2	57496	1	0	0	0	0	0
ENSG00000186297	2542	GABRA5	2558	1	0	0	0	0	0
ENSG00000186472	27189	PCLO	27445	0	1	1	0	0	0
ENSG00000186487	22795	MYT1L	23040	1	0	1	0	0	0
ENSG00000186591	7285	UBE2H	7328	1	0	0	0	0	0
ENSG00000186654	34904	PRR5	55615	0	0	0	0	0	1
ENSG00000186732	754	MPPED1	758	0	0	0	0	0	1
ENSG00000186868	4112	MAPT	4137	0	0	1	0	1	0
ENSG00000186951	5433	PPARA	5465	0	0	0	0	0	1
ENSG00000186976	41373	EFCAB6	64800	0	0	0	0	0	1
ENSG00000187049	30740	TMEM216	51259	0	1	0	1	0	0
ENSG00000187091	5301	PLCD1	5333	1	0	0	0	0	0
ENSG00000187189	23025	TSPYL4	23270	0	0	1	0	0	0
ENSG00000187372	35406	PCDHB13	56123	0	0	1	0	0	0
ENSG00000187391	9719	MAGI2	9863	0	0	1	0	0	0
ENSG00000187486	3742	KCNJ11	3767	0	1	1	0	0	0
ENSG00000187498	1273	COL4A1	1282	0	1	1	0	0	0
ENSG00000187555	7828	USP7	7874	1	0	0	0	0	0
ENSG00000187566	119798	NHLRC1	378884	0	0	1	0	0	0
ENSG00000187608	9492	ISG15	9636	0	0	1	0	0	0
ENSG00000187634	80707	SAMD11	148398	1	0	0	0	0	0
ENSG00000187730	2547	GABRD	2563	0	0	1	0	0	0
ENSG00000187775	8563	DNAH17	8632	1	0	0	0	0	0
ENSG00000187796	40803	CARD9	64170	0	0	1	0	0	0
ENSG00000187957	60215	DNER	92737	1	0	0	0	0	0
ENSG00000188064	7434	WNT7B	7477	0	0	0	0	0	1
ENSG00000188130	6266	MAPK12	6300	1	0	0	0	0	1
ENSG00000188153	1278	COL4A5	1287	0	1	0	0	0	0
ENSG00000188158	4779	NHS	4810	0	1	1	0	0	0
ENSG00000188171	83499	ZNF626	199777	1	0	0	0	0	0
ENSG00000188277	158768	C15orf62	643338	1	0	0	0	0	0
ENSG00000188321	58728	ZNF559	84527	1	0	0	0	0	0
ENSG00000188603	1192	CLN3	1201	0	1	1	0	0	0
ENSG00000188636	58457	LDOC1L	84247	0	0	0	0	0	1
ENSG00000188641	1794	DPYD	1806	1	1	1	0	0	0
ENSG00000188677	29515	PARVB	29780	0	0	0	0	0	1
ENSG00000188706	30596	ZDHHC9	51114	0	1	0	0	0	0
ENSG00000188785	80628	ZNF548	147694	1	0	0	0	0	0
ENSG00000188786	4494	MTF1	4520	1	0	0	0	0	0
ENSG00000188906	78809	LRRK2	120892	0	0	1	0	1	0
ENSG00000188994	22791	ZNF292	23036	1	0	0	0	0	0
ENSG00000189056	5617	RELN	5649	1	0	1	0	0	0
ENSG00000189108	26028	IL1RAPL2	26280	1	0	0	0	0	0
ENSG00000189221	4103	MAOA	4128	1	1	1	1	1	0
ENSG00000189283	2257	FHIT	2272	1	0	0	0	0	0
ENSG00000189306	27086	RRP7A	27341	0	0	0	0	0	1
ENSG00000196090	10963	PTPRT	11122	1	0	0	0	0	0
ENSG00000196126	3105	HLA-DRB1	3123	1	0	0	0	0	0
ENSG00000196159	55436	FAT4	79633	0	0	1	0	0	0
ENSG00000196177	33	ACADSB	36	0	0	1	0	0	0
ENSG00000196218	6228	RYR1	6261	0	0	1	1	0	0
ENSG00000196220	9757	SRGAP3	9901	1	0	0	0	0	0
ENSG00000196236	40572	XPNPEP3	63929	0	1	1	0	0	1
ENSG00000196277	2900	GRM7	2917	1	0	0	0	0	0
ENSG00000196305	3356	IARS	3376	0	0	0	1	0	0
ENSG00000196338	33704	NLGN3	54413	1	0	0	0	0	0
ENSG00000196361	1980	ELAVL3	1995	1	0	0	0	0	0
ENSG00000196367	8242	TRRAP	8295	1	0	0	0	0	0
ENSG00000196391	109975	ZNF774	342132	1	0	0	0	0	0
ENSG00000196419	2531	XRCC6	2547	0	0	0	0	0	1
ENSG00000196517	6500	SLC6A9	6536	0	0	0	1	0	0
ENSG00000196547	4097	MAN2A2	4122	0	0	1	0	0	0
ENSG00000196557	8833	CACNA1H	8912	1	0	1	0	0	0
ENSG00000196569	3883	LAMA2	3908	0	1	1	1	0	0
ENSG00000196576	23407	PLXNB2	23654	0	0	1	0	0	1
ENSG00000196588	36864	MKL1	57591	0	0	0	0	0	1
ENSG00000196628	6885	TCF4	6925	1	1	1	0	1	0
ENSG00000196632	41768	WNK3	65267	1	0	0	0	0	0
ENSG00000196712	4737	NF1	4763	1	1	1	0	0	0
ENSG00000196730	1600	DAPK1	1612	1	0	0	0	0	0
ENSG00000196743	2743	GM2A	2760	0	1	0	0	0	0
ENSG00000196839	97	ADA	100	1	0	0	0	0	0
ENSG00000196876	6299	SCN8A	6334	1	1	1	1	0	0
ENSG00000196924	2300	FLNA	2316	0	1	1	0	0	0
ENSG00000196943	81507	C14orf21	161424	0	0	0	0	1	0
ENSG00000196998	10993	WDR45	11152	0	1	1	0	0	0
ENSG00000197102	1766	DYNC1H1	1778	1	1	1	0	0	0
ENSG00000197106	123092	SLC6A17	388662	0	1	0	0	0	0
ENSG00000197121	55857	PGAP1	80055	0	1	1	0	0	0
ENSG00000197157	26789	SND1	27044	1	0	0	0	0	0
ENSG00000197170	5686	PSMD12	5718	1	0	0	0	0	0
ENSG00000197182	125348	MIR4763	400931	0	0	0	0	0	1
ENSG00000197249	5233	SERPINA1	5265	0	1	0	0	0	0
ENSG00000197283	8754	SYNGAP1	8831	1	1	1	0	0	0
ENSG00000197299	638	BLM	641	0	1	0	0	0	0
ENSG00000197321	6800	SVIL	6840	0	0	1	0	0	0
ENSG00000197323	31072	TRIM33	51592	1	0	0	0	0	0
ENSG00000197363	109849	ZNF517	340385	1	0	0	0	0	0
ENSG00000197381	101	ADARB1	104	1	0	0	0	0	0
ENSG00000197386	3047	HTT	3064	0	0	1	0	0	0
ENSG00000197496	56742	SLC2A10	81031	0	0	0	1	0	0
ENSG00000197535	4618	MYO5A	4644	1	0	0	0	0	0
ENSG00000197548	10386	ATG7	10533	1	0	0	0	0	0
ENSG00000197563	23310	PIGN	23556	0	1	1	1	0	0
ENSG00000197601	58399	FAR1	84188	0	1	1	0	0	0
ENSG00000197635	1791	DPP4	1803	1	0	0	0	0	0
ENSG00000197653	83407	DNAH10	196385	1	0	0	0	0	0
ENSG00000197694	6669	SPTAN1	6709	0	1	1	0	0	0
ENSG00000197724	5221	PHF2	5253	1	0	0	0	0	0
ENSG00000197746	5628	PSAP	5660	0	1	1	0	0	0
ENSG00000197779	110248	ZNF81	347344	0	1	0	0	0	0
ENSG00000197785	34499	ATAD3A	55210	0	0	0	1	0	0
ENSG00000197822	4919	OCLN	100506658	0	1	1	0	0	0
ENSG00000197857	31190	ZNF44	51710	0	0	1	0	0	0
ENSG00000197892	23058	KIF13B	23303	1	0	0	0	0	0
ENSG00000197959	25801	DNM3	26052	0	0	1	0	0	0
ENSG00000197977	34187	ELOVL2	54898	1	0	0	0	0	0
ENSG00000198010	9103	DLGAP2	9228	1	0	0	0	0	0
ENSG00000198130	26023	HIBCH	26275	0	0	1	0	0	0
ENSG00000198198	23089	SZT2	23334	0	0	1	0	0	0
ENSG00000198211	10234	TUBB3	10381	0	0	1	0	0	0
ENSG00000198216	773	CACNA1E	777	1	0	0	0	0	0
ENSG00000198218	34159	QRICH1	54870	1	0	0	0	0	0
ENSG00000198286	58634	CARD11	84433	1	0	0	0	0	0
ENSG00000198355	128954	PIM3	415116	0	0	0	0	0	1
ENSG00000198467	7126	TPM2	7169	0	0	0	1	0	0
ENSG00000198523	5318	PLN	5350	1	0	0	0	0	0
ENSG00000198589	982	LRBA	987	1	0	0	0	0	0
ENSG00000198648	27092	STK39	27347	1	0	0	0	0	0
ENSG00000198673	109581	FAM19A2	338811	1	0	0	0	0	0
ENSG00000198689	10332	SLC9A6	10479	1	1	1	1	0	0
ENSG00000198690	22665	FAN1	22909	1	0	0	0	0	0
ENSG00000198707	55985	CEP290	80184	1	1	1	1	0	0
ENSG00000198732	40726	SMOC1	64093	0	1	0	0	0	0
ENSG00000198752	9436	CDC42BPB	9578	1	0	0	0	0	0
ENSG00000198793	2459	MTOR	2475	1	0	1	0	0	0
ENSG00000198805	4829	PNP	4860	0	1	0	0	0	0
ENSG00000198814	2694	GK	2710	0	1	1	0	0	0
ENSG00000198824	93981	CHAMP1	283489	0	1	0	0	0	0
ENSG00000198826	9680	ARHGAP11A	9824	0	1	0	0	0	0
ENSG00000198835	36441	GJC2	57165	0	1	0	1	0	0
ENSG00000198836	4944	OPA1	4976	0	0	1	0	0	0
ENSG00000198838	6230	RYR3	6263	0	0	1	0	0	0
ENSG00000198844	22655	ARHGEF15	22899	0	0	1	0	0	0
ENSG00000198853	9709	RUSC2	9853	0	0	0	1	0	0
ENSG00000198860	77791	TSEN15	116461	0	0	1	0	0	0
ENSG00000198900	7107	TOP1	7150	1	0	0	0	0	0
ENSG00000198910	3872	L1CAM	3897	0	1	1	0	0	0
ENSG00000198911	6681	SREBF2	6721	0	0	0	0	0	1
ENSG00000198929	9578	NOS1AP	9722	1	0	0	0	0	0
ENSG00000198947	1744	DMD	1756	1	1	1	0	0	0
ENSG00000198951	4642	NAGA	4668	0	1	0	0	0	1
ENSG00000198954	25877	KIAA1279	26128	0	1	0	0	0	0
ENSG00000198963	6064	RORB	6096	0	0	1	0	0	0
ENSG00000203667	77754	FAM36A	116228	0	1	0	0	0	0
ENSG00000203760	122200	CENPW	387103	0	0	1	0	0	0
ENSG00000203879	2648	GDI1	2664	0	1	1	0	0	0
ENSG00000204120	25807	GIGYF2	26058	1	0	0	0	0	0
ENSG00000204248	1293	COL11A2	1302	0	1	0	0	0	0
ENSG00000204256	6014	BRD2	6046	0	0	1	0	0	0
ENSG00000204264	5664	PSMB8	5696	0	1	1	0	0	0
ENSG00000204370	6356	SDHD	6392	0	0	1	0	0	0
ENSG00000204386	4732	NEU1	4758	0	1	1	0	0	0
ENSG00000204406	35066	MBD5	55777	1	1	1	0	0	0
[truncated: 118 more rows]
